# Supplementary material
Source: publisher figshare collection journal article supplement (https://gsapubs.figshare.com/articles/dataset/_/19176050)
Supplement: Supplementary file 1 [file 1]

## Sheet: Trinidad SS 63-125um 
	Table S2. U-Pb Isotope Data for Detrital Zircon, Trinidad Sandstone, Coarse Fraction (Very Fine Sand), Raton Basin																																	Sylvester, Souders, Liu Geology G49684
	Mineral Isotope Laser Laboratory (MILL), Texas Tech University, 20 µm spots, 2.5 J/cm2, 30 sec total ablation, 8Hz, 240 shots										Andersen (2002) Correction		U-Pb Data for Wetherill plot3					U-Pb Data for Tera-Wasserburg plot3				Th-Pb Data3		Dates (Ma)5								206Pb/238U-207Pb/235U	206Pb/238U-207Pb/206Pb			Grain dimensions
Count	File sequence	Grain-Analysis Number	Source file	Date	Duration (s)	Points	U ppm1	Th/U1	204Pb cps	206Pb/204Pb	Corrected2 Final Fraction Common Pb	Correction Used	207Pb/235U	2sprop4	206Pb/238U	2sprop4	Error Correlation Rho	238U/206Pb	2sint4	207Pb/206Pb	2sprop4	208Pb/232Th	2sprop4	207Pb/235U	2sprop4	206Pb/238U	2sprop4	207Pb/206Pb	2sprop4	208Pb/232Th	2sprop4	% Conc6	% Conc7	Preferred Age8	2sprop4	Length (mm)	Width (mm)	[Length + Width]/2
1	Trinidad_64__14	23245	8470c_TRA_Data	2018-11-04	28.117	142	693	0.369408	13	5253.85	0.0028	no	0.07	0.0027	0.0105	0.00029	0.17607	95.2381	0.93	0.04835	0.001	0.00383	0.00016	68.7	2.5	67.32	1.8	187	26	77.2	3.1	97.9913	36	67.32	1.8	109.799	43.809	76.804
2	Trinidad64_1_9	10	8583c_TRA_Data	2018-11-16	18.646	94	216.8	1.48985	607	78.0725	0.247	yes	0.0669	0.0013	0.01051	0.0002	0.99946	95.8	1.7	0.0461	1.6e-05	0.00353	0.0002	65.7	1.2	67.4	1.2	2.86	0.85	71.1	4	102.588	2356.64	67.4	1.2	95.284	23.363	59.3235
3	Trinidad_64__11	43400	8479c_TRA_Data	2018-11-04	11.642	58	460	0.654348	57	784.211	0.0028	no	0.0706	0.0023	0.01059	0.00022	0.17624	94.4287	1.7	0.0482	0.0019	0.00388	0.00016	69.3	2.2	67.9	1.4	166	44	78.3	3.3	97.9798	40.9036	67.9	1.4	59.785	52.635	56.21
4	Trinidad64_1_6	7	8583c_TRA_Data	2018-11-16	17.314	85	437.9	0.251199	30	2440	0.0054	no	0.0735	0.0031	0.01061	0.00017	0.25888	94.2507	0.95	0.0507	0.0014	0.00438	0.00014	72	2.9	68.04	1.1	223	32	88.3	2.8	94.5	30.5112	68.04	1.1	67.84	49.33	58.585
5	Trinidad_64__0	4425	8464c_TRA_Data	2018-11-04	25.332	128	390	0.392308	45	1006.67	0.0019	no	0.0698	0.002	0.0107	0.00016	0.11687	93.4579	1.1	0.0475	0.0011	0.00376	0.00016	68.5	1.9	68.6	1	159	28	75.7	3.3	100.146	43.1447	68.6	1	111.126	41.324	76.225
6	Trinidad_64__2	46503	8481c_TRA_Data	2018-11-04	26.526	134	301	0.747508	48	718.75	0.0046	no	0.0765	0.0022	0.01111	0.00018	0.21514	90.009	0.96	0.049	0.0014	0.00345	0.00024	75	2.1	71.21	1.2	217	31	69.6	4.8	94.9467	32.8157	71.21	1.2	81.327	40.181	60.754
7	Trinidad_64__1	17	8584c_TRA_Data	2018-11-16	12.97	66	152.6	1.0924	26	931.923	0.0004	no	0.071	0.0089	0.01112	0.00023	0.22222	89.9281	1.7	0.0463	0.0053	0.00376	0.00069	69.6	8.4	71.3	1.5	176	47	75.9	14	102.443	40.5114	71.3	1.5	67.564	43.322	55.443
8	Trinidad_64__2	18	8584c_TRA_Data	2018-11-16	12.04	61	142.9	0.574528	16	1431.88	0.0047	no	0.0776	0.0097	0.01125	0.00026	0.56376	88.8889	1.9	0.0499	0.0057	0.00408	0.00076	75.8	9.1	72.1	1.7	229	45	82.4	15	95.1187	31.4847	72.1	1.7	61.291	36.46	48.8755
9	Trinidad_64__0	45694	8481c_TRA_Data	2018-11-04	27.889	141	100.7	0.802383	43	274.186	0.0054	no	0.0777	0.0032	0.01133	0.00024	0.19881	88.2613	1.5	0.0495	0.0021	0.00322	0.00025	76.3	3.1	72.6	1.5	318	41	64.9	5	95.1507	22.8302	72.6	1.5	90.026	44.277	67.1515
10	Trinidad_64__1	27177	8472c_TRA_Data	2018-11-04	9.1177	46	439.4	0.355257	105	490.476	0.0039	no	0.0769	0.0027	0.01137	0.00031	0.04	87.9507	1.6	0.0492	0.0021	0.004	0.00022	75.2	2.6	72.9	2	187	36	80.6	4.4	96.9415	38.984	72.9	2	91.55	36.458	64.004
11	Trinidad_64__15	10693	8478c_TRA_Data	2018-11-04	23.288	114	153.1	0.927498	21	794.286	0.0015	no	0.0749	0.0027	0.01146	0.00018	0.073816	87.26	1.2	0.0478	0.0018	0.00379	0.00017	73.3	2.6	73.5	1.2	276	47	76.5	3.4	100.273	26.6304	73.5	1.2	108.993	36.379	72.686
12	Trinidad_64__7	13647	8485c_TRA_Data	2018-11-04	17.946	90	923	0.774648	60	1613.33	0.0013	no	0.0743	0.0028	0.01147	0.00047	0.19948	87.184	1.6	0.0471	0.0012	0.00507	0.00019	72.8	2.7	73.5	3	168	31	102.3	3.8	100.962	43.75	73.5	3	82.119	37.174	59.6465
13	Trinidad_64__2	59319	8483c_TRA_Data	2018-11-04	21.413	107	210.4	1.04087	25	1012.8	0.0231	yes	0.0732	0.0011	0.0115	0.00021	0.97718	87.4	1.2	0.046111	2.7e-05	0.00328	0.0002	71.7	1	73.7	1.3	3.4	1.4	66.1	4	102.789	2167.65	73.7	1.3	69.524	64.633	67.0785
14	Trinidad_64__8	1640	8462c_TRA_Data	2018-11-04	16.173	82	184.4	0.864967	109	191.101	0.0029	no	0.0773	0.0034	0.01152	0.00037	0.22553	86.8056	1.5	0.0485	0.0018	0.00387	0.00019	75.5	3.2	73.8	2.3	225	42	78	3.8	97.7483	32.8	73.8	2.3	120.491	42.886	81.6885
15	Trinidad_64__7	37395	8474c_TRA_Data	2018-11-04	18.817	95	3496	0.912471	3750	137.067	0.1429	yes	0.07575	0.00094	0.01189	0.00025	0.97361	84.4	1	0.046166	7.2e-05	0.003068	0.00012	74.13	0.88	76.17	1.6	6.2	3.7	61.9	2.4	102.752	1228.55	76.17	1.6	90.226	56.471	73.3485
16	Trinidad_64__3	47010	8481c_TRA_Data	2018-11-04	28.125	142	232	0.987069	33	827.273	0.003	no	0.0785	0.0024	0.01189	0.00023	0.13188	84.1043	1.2	0.0471	0.0015	0.00384	0.0003	76.6	2.3	76.2	1.5	200	34	77.5	6	99.4778	38.1	76.2	1.5	67.666	41.838	54.752
17	Trinidad_64__18	57120	8482c_TRA_Data	2018-11-04	28.118	142	130	0.66	21	750	0.0028	no	0.0788	0.0032	0.01195	0.00025	0.19252	83.682	1.3	0.0498	0.002	0.00379	0.00027	76.9	3	76.6	1.6	292	45	76.4	5.5	99.6099	26.2329	76.6	1.6	94.656	41.795	68.2255
18	Trinidad_64__6	41821	8479c_TRA_Data	2018-11-04	24.911	125	1051	2.56898	25	4932	0.00203	no	0.0801	0.0016	0.01214	0.00016	0.17808	82.3723	0.67	0.04762	0.0011	0.003765	9e-05	78.3	1.5	77.8	1	136	25	75.95	1.8	99.3614	57.2059	77.8	1	90.81	63.624	77.217
19	Trinidad_64__4	35438	8474c_TRA_Data	2018-11-04	23.94	120	59.7	2.34506	11	739.091	0.0035	no	0.0873	0.0044	0.01278	0.00032	0.076693	78.2473	1.8	0.0493	0.0027	0.00368	0.00018	84.7	4.1	81.9	2	383	60	74.3	3.6	96.6942	21.3838	81.9	2	75.086	53.609	64.3475
20	Trinidad_64__9	25	8585c_TRA_Data	2018-11-16	24.535	121	847	0.48902	1	169200	0.00251	no	0.0868	0.01	0.01303	0.00017	0.35946	76.746	0.65	0.04848	0.0053	0.00472	0.00086	84.5	9.6	83.48	1.1	145	22	95.3	17	98.7929	57.5724	83.48	1.1	108.491	36.828	72.6595
21	Trinidad_64__10	38163	8474c_TRA_Data	2018-11-04	20.532	103	5420	1.15314	11350	86.696	0.2522	yes	0.0844	0.0026	0.0132	0.00042	0.99501	76.8	2.4	0.046196	8.4e-05	0.00357	0.00022	82.2	2.4	84.5	2.7	7.7	4.3	72	4.4	102.798	1097.4	84.5	2.7	80.268	48.923	64.5955
22	Trinidad_64__5	1132	8462c_TRA_Data	2018-11-04	25.016	126	594	0.498316	45	1911.11	0.00247	no	0.0952	0.0026	0.01432	0.0004	0.30764	69.8324	0.63	0.04846	0.00082	0.00479	0.00014	92.3	2.4	91.67	2.5	150	20	96.6	2.7	99.3174	61.1133	91.67	2.5	74.326	51.847	63.0865
23	Trinidad_64__9	6073	8464c_TRA_Data	2018-11-04	25.127	127	210	0.828571	5	8120	0.0039	no	0.1297	0.0058	0.01914	0.00076	0.78397	52.2466	2.2	0.049	0.0013	0.00591	0.00031	123.5	5.2	122.2	4.8	208	29	119.1	6.2	98.9474	58.75	122.2	4.8	79.427	47.803	63.615
24	Trinidad_64__2	4018	8485c_TRA_Data	2018-11-04	23	116	862	2.13689	38	5302.63	0.00463	no	0.1596	0.0053	0.02299	0.00088	0.43512	43.4972	0.42	0.05034	0.00076	0.00749	0.00027	150.3	4.7	146.5	5.5	220	23	150.8	5.4	97.4717	66.5909	146.5	5.5	82.884	48.591	65.7375
25	Trinidad_64__1	58361	8483c_TRA_Data	2018-11-04	18.067	92	389	1.65553	86	1090.7	0.0058	no	0.1682	0.0038	0.02386	0.00036	0.23268	41.9111	0.47	0.05113	0.001	0.00837	0.00032	157.8	3.3	152	2.3	258	32	168.4	6.4	96.3245	58.9147	152	2.3	74.543	56.218	65.3805
26	Trinidad_64__14	56103	8482c_TRA_Data	2018-11-04	22.066	111	171.7	2.47758	7	6285.71	0.0027	no	0.1645	0.0048	0.02435	0.00041	0.25187	41.0678	0.46	0.0494	0.0014	0.006326	0.00041	154.4	4.2	155.1	2.6	201	31	127.5	8.2	100.453	77.1642	155.1	2.6	72.345	54.558	63.4515
27	Trinidad_64__12	10352	8478c_TRA_Data	2018-11-04	26.45	133	909	1.72277	1	214900	0.00215	no	0.1649	0.0019	0.02457	0.00024	0.35102	40.7	0.28	0.04875	0.00053	0.00691	0.00027	154.9	1.7	156.5	1.5	147	14	139.1	5.4	101.033	106.463	156.5	1.5	77.817	51.629	64.723
28	Trinidad_64__6	65079	8483c_TRA_Data	2018-11-04	15.176	77	1880	1.54787	170	2717.65	0.0137	no	0.1907	0.0041	0.0246	0.00035	0.12	40.6504	0.37	0.0565	0.0012	0.00625	0.00027	177.2	3.4	156.6	2.2	463	41	126	5.4	88.3747	33.8229	156.6	2.2	67.752	49.665	58.7085
29	Trinidad_64__8	22334	8469c_TRA_Data	2018-11-04	25.632	127	108.8	1.3704	42	728.571	0.0035	no	0.1728	0.0073	0.02535	0.00075	0.28533	39.4477	0.6	0.0494	0.0014	0.00867	0.0003	161.6	6.3	161.4	4.7	230	36	174.5	6	99.8762	70.1739	161.4	4.7	89.47	40.212	64.841
30	Trinidad_64__13	30961	8484c_TRA_Data	2018-11-04	19.661	99	4600	2.38696	4490	285.746	0.114	yes	0.167	0.012	0.0255	0.0016	0.99027	43.7	3.1	0.04707	0.00044	0.0015	0.00013	155.4	10	162.1	10	50	21	30.4	2.5	104.311	324.2	162.1	10	65.264	50.247	57.7555
31	Trinidad_64__3	28464	8472c_TRA_Data	2018-11-04	15.859	80	98.6	1.57911	3	8783.33	0.0029	no	0.1727	0.0062	0.02566	0.00069	0.33713	38.9712	0.68	0.0491	0.0018	0.00818	0.00034	161.5	5.4	163.3	4.3	256	36	164.6	6.8	101.115	63.7891	163.3	4.3	66.765	40.729	53.747
32	Trinidad_64__6	22	8585c_TRA_Data	2018-11-16	10.86	54	509.1	0.538598	3	63533.3	0.0048	no	0.181	0.021	0.02597	0.00049	0.29402	38.506	0.61	0.05056	0.0055	0.00931	0.0017	168.9	18	165.3	3.1	222	23	187.2	34	97.8686	74.4595	165.3	3.1	75	50	62.5
33	Trinidad_64__4	8566	8477c_TRA_Data	2018-11-04	11.225	57	272	1.83824	33	2103.03	0.0036	no	0.1778	0.007	0.02616	0.00048	0.55989	38.2263	0.63	0.0498	0.0016	0.0085	0.00034	165.9	6	166.4	3	209	46	171.1	6.7	100.301	79.6172	166.4	3	57.61	50.094	53.852
34	Trinidad_64__2	27737	8472c_TRA_Data	2018-11-04	13.901	70	4075	0.518528	107	10355.1	0.00468	no	0.1846	0.0025	0.02631	0.00058	0.30389	38.0084	0.35	0.05094	0.00074	0.00792	0.00028	172	2.1	167.4	3.7	239	26	159.5	5.7	97.3256	70.0418	167.4	3.7	87.987	60.192	74.0895
35	Trinidad_64__16	56696	8482c_TRA_Data	2018-11-04	26.134	132	604	0.860927	29	6117.24	0.00643	no	0.2016	0.0041	0.02839	0.00045	0.29506	35.2237	0.34	0.05245	0.001	0.0077	0.0005	186.4	3.5	180.4	2.8	306	29	155.1	10	96.7811	58.9542	180.4	2.8	74.105	51.821	62.963
36	Trinidad_64__6	37388	8474c_TRA_Data	2018-11-04	18.559	93	1008	0.452381	3	129333	0.00229	no	0.2583	0.0042	0.03659	0.00057	0.61772	27.3299	0.27	0.05132	0.00058	0.01117	0.00039	233.2	3.4	231.6	3.5	254	14	224.5	7.9	99.3139	91.1811	231.6	3.5	61.202	52.415	56.8085
37	Trinidad_64__1	3387	8485c_TRA_Data	2018-11-04	25.222	127	591	0.368866	54	4240.74	0.00311	no	0.2766	0.0091	0.03902	0.0015	0.26308	25.6279	0.23	0.05156	0.00081	0.01306	0.00045	247.8	7.2	246.8	9.2	266	22	262.3	9	99.5964	92.782	246.8	9.2	73.851	44.923	59.387
38	Trinidad_64__13	29	8585c_TRA_Data	2018-11-16	13.709	67	687	0.574964	6	70666.7	0.00149	no	0.294	0.035	0.0416	0.00064	0.59833	24.0385	0.28	0.05104	0.0055	0.01199	0.0022	261.6	27	262.7	4	242	15	240.8	43	100.42	108.554	262.7	4	89.436	35.182	62.309
39	Trinidad_64__10	43376	8479c_TRA_Data	2018-11-04	17.787	90	436	0.522936	19	15000	0.00222	no	0.5211	0.0094	0.06744	0.001	0.52177	14.828	0.16	0.05543	0.0011	0.02133	0.00055	425.7	6.3	420.7	6	430	26	426.6	11	98.8255	97.8372	420.7	6	64.014	49.537	56.7755
40	Trinidad_64__5	35450	8474c_TRA_Data	2018-11-04	9.43	48	175	0.754286	92	1347.83	0.0071	no	0.538	0.018	0.0683	0.0019	0.50194	14.6413	0.37	0.0579	0.0017	0.02091	0.001	437	12	426	11	510	37	418	21	97.4828	83.5294	426	11	84.919	55.031	69.975
41	Trinidad_64__14	15261	8468c_TRA_Data	2018-11-04	16.218	81	2389	1.11093	583	3924.53	0.0391	yes	0.495	0.032	0.06851	0.0017	0.8183	14.64	0.17	0.0523	0.0011	0.01468	0.00027	407.7	22	427.2	10	284	49	294.5	5.4	104.783	150.423	427.2	10	67.487	50.403	58.945
42	Trinidad_64__4	4276	8485c_TRA_Data	2018-11-04	7.0963	35	431	0.967517	40	7807.5	0.009	no	0.5594	0.02	0.07013	0.0031	0.24848	14.2592	0.17	0.0581	0.0012	0.02406	0.00091	451	13	436.9	18	530	28	480	18	96.8736	82.434	436.9	18	85.552	42.036	63.794
43	Trinidad_64__5	12657	8485c_TRA_Data	2018-11-04	21.942	110	134.2	0.758569	16	5487.5	0.0037	no	0.5414	0.019	0.07042	0.0028	0.4564	14.2005	0.18	0.05556	0.001	0.02386	0.00088	438.8	13	438.6	17	436	27	477	17	99.9544	100.596	438.6	17	86.889	44.477	65.683
44	Trinidad_64__14	39728	8475c_TRA_Data	2018-11-04	16.046	80	4960	0.641129	3830	1083.03	0.0548	yes	0.604	0.018	0.0763	0.0021	0.99952	13.27	0.35	0.05726	0.00029	0.00128	0.00087	479	12	474	12	501	11	26	18	98.9562	94.6108	474	12	61.523	56.441	58.982
45	Trinidad_64__17	56978	8482c_TRA_Data	2018-11-04	27.116	133	2062	0.775946	880	2087.5	0.04293	yes	0.657	0.019	0.0819	0.0019	0.99973	12.37	0.25	0.05801	0.00054	-0.0056	0.0011	511.3	12	507.3	11	529.2	20	-114	22	99.2177	95.8617	507.3	11	75.682	52.126	63.904
46	Trinidad_64__10	6115	8464c_TRA_Data	2018-11-04	22.056	112	3550	0.286761	21200	179.717	0.124	yes	0.712	0.016	0.0863	0.0013	0.8855	11.66	0.16	0.06025	0.0006	0.011	0.0027	545.9	9.7	533.3	7.7	609	21	218	53	97.6919	87.5698	533.3	7.7	74.978	49.923	62.4505
47	Trinidad_64__4	20702	8469c_TRA_Data	2018-11-04	15.27	77	956	3.07427	95	9642.11	0.0103	no	0.7985	0.028	0.09206	0.0025	0.28582	10.8625	0.088	0.06293	0.001	0.02685	0.00088	595.7	16	567.7	15	702	26	535.6	17	95.2996	80.8689	567.7	15	71.242	46.533	58.8875
48	Trinidad_64__3	4789	8464c_TRA_Data	2018-11-04	6.0195	30	1706	0.684642	780	2126.92	0.0556	yes	0.783	0.037	0.0941	0.0032	0.99961	10.71	0.35	0.06025	0.00055	-0.0053	0.0015	586	21	579	19	612	20	-107	31	98.8055	94.6078	579	19	102.62	52.929	77.7745
49	Trinidad_64__5	21626	8469c_TRA_Data	2018-11-04	22.688	115	1040	0.8375	833	1506.6	0.0536	yes	0.906	0.05	0.1049	0.0032	0.93812	9.55	0.11	0.0622	0.00037	0.02492	0.00099	654.2	27	643.1	19	692	20	497	19	98.3033	92.9335	643.1	19	72.03	51.407	61.7185
50	Trinidad_64__11	5554	8484c_TRA_Data	2018-11-04	12.655	64	1359	0.523915	630	2665.08	0.048	yes	1.025	0.036	0.1144	0.0025	0.92745	8.79	0.17	0.06465	0.00099	0.0259	0.0022	715	18	698	15	760	31	516	43	97.6224	91.8421	698	15	76.414	27.226	51.82
51	Trinidad_64__9	22363	8469c_TRA_Data	2018-11-04	25.833	130	1900	0.568421	383	6318.54	0.04764	yes	1.027	0.051	0.1157	0.0041	0.99939	8.81	0.22	0.06398	0.00088	0.00993	0.0011	713	25	705	24	738	29	199	21	98.878	95.5285	705	24	64.277	49.89	57.0835
52	Trinidad_64__10	1101	8484c_TRA_Data	2018-11-04	17.373	88	4800	0.277708	10100	642.574	0.0458	yes	1.227	0.05	0.1317	0.0031	0.94212	7.6	0.14	0.06668	0.00045	0.0011	0.002	812	23	797	18	827	14	22	41	98.1527	96.3724	797	18	64.737	48.621	56.679
53	Trinidad64_1_0	1	8582c_TRA_Data	2018-11-16	28.124	142	758	0.55277	2050	740.976	0.0551	yes	1.269	0.1	0.1333	0.0054	0.99284	7.92	0.32	0.06759	0.0015	0.0127	0.0013	817	45	804	31	846	46	255	25	98.4088	95.0355	804	31	63.68	43.657	53.6685
54	Trinidad64_1_1	2	8582c_TRA_Data	2018-11-16	21.261	107	2090	0.748325	2010	2223.88	0.039	yes	1.225	0.089	0.1329	0.0028	0.99964	7.57	0.11	0.06692	0.00058	0.02449	0.00064	812	41	804	16	834	18	489	13	99.0148	96.4029	804	16	66.689	43.293	54.991
55	Trinidad_64__15	24838	8470c_TRA_Data	2018-11-04	20.438	103	2640	0.420833	17740	210.823	0.1015	yes	1.323	0.086	0.1371	0.0043	0.90759	7.317	0.079	0.0698	0.00074	0.0222	0.0023	854.5	37	828	24	921	21	443	45	96.8988	89.9023	828	24	67.332	51.832	59.582
56	Trinidad_64__15	40397	8475c_TRA_Data	2018-11-04	19.647	99	1870	0.335829	4890	582.822	0.0627	yes	1.313	0.037	0.1383	0.0034	0.99753	7.3	0.14	0.06864	0.00049	-0.0107	0.0015	849	16	835	19	886	15	-218	30	98.351	94.2438	835	19	90.279	52.863	71.571
57	Trinidad_64__6	13296	8485c_TRA_Data	2018-11-04	14.867	75	1178	0.116299	24	66208.3	0.0363	yes	1.332	0.066	0.141	0.0061	0.99945	7.13	0.13	0.06839	0.00058	-0.0788	0.0092	858	29	850	34	879	18	-1670	200	99.0676	96.7008	850	34	91.624	36.436	64.03
58	Trinidad_64__4	47629	8481c_TRA_Data	2018-11-04	19.807	100	75.8	1.26781	21	5757.14	0.0018	no	1.49	0.032	0.153	0.0027	0.62236	6.53595	0.081	0.06922	0.0013	0.04418	0.0029	925.4	13	918	15	907	22	874	55	99.2003	101.213	918	15	64.667	42.454	53.5605
59	Trinidad64_1_3	4	8582c_TRA_Data	2018-11-16	15.82	80	1035	0.498551	280	8650	0.0478	yes	1.535	0.1	0.1544	0.0053	0.99877	6.6	0.2	0.07149	0.0017	0.0051	0.0017	937	40	925	29	967	48	102	33	98.7193	95.6567	925	29	94.556	44.027	69.2915
60	Trinidad_64__1	10812	8467c_TRA_Data	2018-11-04	9.4778	48	94	1.65957	350	1814.29	0.0395	yes	1.695	0.088	0.1663	0.0057	0.99866	6.03	0.16	0.07363	0.00088	0.0197	0.0023	1003	33	991	32	1029	25	394	45	98.8036	96.3071	991	32	92.314	42.311	67.3125
61	Trinidad_64__0	57339	8483c_TRA_Data	2018-11-04	25.054	127	2310	0.409091	674	6097.92	0.0311	yes	1.775	0.08	0.1726	0.005	0.95485	5.89	0.15	0.07426	0.0014	-0.0067	0.0016	1031	28	1025	27	1043	36	-137	33	99.418	98.2742	1025	27	91.377	33.998	62.6875
62	Trinidad_64__6	9656	8477c_TRA_Data	2018-11-04	25.417	128	98	0.784694	5	37020	0.00086	no	1.948	0.022	0.1878	0.0024	0.54017	5.32481	0.059	0.07471	0.00079	0.056	0.0019	1097	7.7	1109	13	1064	12	1101	37	101.094	104.229	1064	12	68.945	44.586	56.7655
63	Trinidad_64__7	9795	8477c_TRA_Data	2018-11-04	14.348	73	187.8	0.676784	49	7032.65	0.00043	no	1.985	0.029	0.193	0.0027	0.61791	5.18135	0.064	0.07557	0.00094	0.05622	0.002	1109.5	9.9	1137	14	1080	13	1105	38	102.479	105.278	1080	13	80.498	44.082	62.29
64	Trinidad_64__5	12142	8467c_TRA_Data	2018-11-04	16.66	84	400	0.55775	84	9202.38	0.0052	no	1.837	0.041	0.1751	0.004	0.57089	5.71102	0.061	0.07615	0.00067	0.05709	0.00078	1058.3	15	1040	22	1102	11	1122	15	98.2708	94.3739	1102	11	64	58.716	61.358
65	Trinidad_64__13	32421	8473c_TRA_Data	2018-11-04	22.62	114	297.9	0.662303	18	30500	0.0102	no	1.878	0.026	0.1771	0.004	0.48767	5.64653	0.056	0.07791	0.0012	0.06142	0.0021	1072.7	9.3	1051.1	22	1143	19	1205	40	97.9864	91.9598	1143	19	102.144	36.682	69.413
66	Trinidad_64__3	41330	8479c_TRA_Data	2018-11-04	6.0971	31	728	0.302198	100	13190	9e-05	no	2.132	0.04	0.1955	0.0035	0.63979	5.11509	0.076	0.079	0.0017	0.0571	0.0017	1158.9	13	1151	19	1172	20	1122	33	99.3183	98.2082	1172	20	89.228	40.831	65.0295
67	Trinidad_64__7	1484	8462c_TRA_Data	2018-11-04	11.079	56	23.99	0.70321	88	588.636	0.0026	no	2.22	0.088	0.201	0.0078	0.79147	4.97512	0.14	0.0803	0.0017	0.0591	0.0026	1184	27	1179	42	1203	22	1160	49	99.5777	98.005	1203	22	68.475	58.775	63.625
68	Trinidad_64__12	55744	8482c_TRA_Data	2018-11-04	27.123	137	1411	0.669029	104	27211.5	0.00143	no	2.198	0.052	0.1994	0.0045	0.95342	5.01504	0.088	0.08033	0.0012	0.043	0.0033	1178	16	1171	24	1206.3	20	850	64	99.4058	97.0737	1206.3	20	112.964	32.056	72.51
69	Trinidad_64__1	46149	8481c_TRA_Data	2018-11-04	15.026	75	379	0.599736	88	9443.18	-0.00018	no	2.347	0.041	0.2067	0.003	0.65095	4.83793	0.037	0.0805	0.0012	0.05404	0.0034	1226.5	13	1211.1	16	1210.7	14	1064	66	98.7444	100.033	1210.7	14	68.499	55.378	61.9385
70	Trinidad_64__12	2991	8463c_TRA_Data	2018-11-04	12.128	61	201.4	0.596326	69	5423.19	0.0035	no	2.25	0.059	0.2001	0.0059	0.53651	4.9975	0.065	0.0813	0.0012	0.06312	0.0014	1196.1	18	1176	32	1229	14	1237	26	98.3195	95.6876	1229	14	161.746	41.214	101.48
71	Trinidad64_1_13	14	8583c_TRA_Data	2018-11-16	9.9551	51	222.2	0.306931	9	74111.1	0.00137	no	2.426	0.092	0.2122	0.0037	0.47541	4.71253	0.055	0.0821	0.0018	0.0684	0.0016	1249.8	27	1240	20	1246	23	1338	29	99.2159	99.5185	1246	23	63.738	49.976	56.857
72	Trinidad_64__9	49092	8481c_TRA_Data	2018-11-04	28.364	143	156.3	0.729367	7	48542.9	-0.0029	no	2.426	0.045	0.2128	0.0035	0.70866	4.69925	0.049	0.08316	0.0013	0.05469	0.0035	1249.4	13	1243	18	1270.8	20	1076	68	99.4878	97.8124	1270.8	20	82.996	49.531	66.2635
73	Trinidad_64__15	32954	8473c_TRA_Data	2018-11-04	9.4706	47	3910	0.586445	2080	3697.12	0.0045	no	2.232	0.035	0.1954	0.0056	0.346	5.11771	0.1	0.0846	0.0019	0.0407	0.0017	1190.7	11	1150	30	1305	30	806	32	96.5818	88.1226	1305	30	82.477	43.232	62.8545
74	Trinidad_64__12	6529	8465c_TRA_Data	2018-11-04	8.8148	44	307.9	0.379019	18	35833.3	0.0039	no	2.621	0.062	0.2195	0.0046	0.36025	4.55581	0.088	0.0863	0.0018	0.0717	0.002	1306	17	1279	24	1342	28	1400	37	97.9326	95.3055	1342	28	74.034	45.808	59.921
75	Trinidad_64__8	37656	8474c_TRA_Data	2018-11-04	7.833	39	202.8	0.808679	55	9085.45	0.0001	no	2.832	0.057	0.2371	0.0053	0.77574	4.21763	0.072	0.0877	0.0011	0.068	0.0026	1363	15	1371	28	1375	17	1330	49	100.587	99.7091	1375	17	61.048	49.775	55.4115
76	Trinidad_64__14	45040	8480c_TRA_Data	2018-11-04	25.85	131	68.3	1.54173	30	5010	0.0033	no	2.81	0.053	0.2328	0.0035	0.60729	4.29553	0.047	0.08814	0.0018	0.06893	0.0016	1357	14	1349	18	1384	23	1347	29	99.4105	97.4711	1384	23	61.168	54.444	57.806
77	Trinidad_64__16	25160	8470c_TRA_Data	2018-11-04	12.46	63	119	0.788235	49	5024.49	0.0117	no	2.801	0.1	0.2317	0.0071	0.74228	4.31593	0.072	0.0883	0.0014	0.0786	0.0026	1355	28	1343	37	1389	19	1530	49	99.1144	96.6883	1389	19	79.19	41.535	60.3625
78	Trinidad_64__11	22724	8470c_TRA_Data	2018-11-04	24.984	125	278	0.820144	112	6008.93	0.00213	no	2.925	0.099	0.2383	0.0064	0.60875	4.19639	0.034	0.0887	0.0011	0.07338	0.0022	1387.9	26	1378	33	1397.1	13	1431	41	99.2867	98.6329	1397.1	13	79.042	67.071	73.0565
79	Trinidad_64__8	9974	8477c_TRA_Data	2018-11-04	10.384	52	1436	0.667131	30	113000	0.00043	no	2.966	0.03	0.2422	0.0036	0.51614	4.12882	0.055	0.0891	0.0011	0.0704	0.0024	1398.6	7.6	1398	19	1402	14	1376	46	99.9571	99.7147	1402	14	75.495	49.961	62.728
80	Trinidad_64__3	59719	8483c_TRA_Data	2018-11-04	15.105	76	539	0.765492	120	10483.3	-0.0047	no	2.796	0.046	0.2283	0.003	0.48708	4.3802	0.035	0.08909	0.0011	0.05779	0.0021	1354.1	12	1325.5	16	1404.4	9.4	1135	40	97.8879	94.3819	1404.4	9.4	75.002	49.931	62.4665
81	Trinidad_64__12	39061	8475c_TRA_Data	2018-11-04	23.131	117	124.3	1.428	10	32310	0.0038	no	3.043	0.044	0.2443	0.004	0.67982	4.09333	0.045	0.08916	0.00088	0.07431	0.0025	1417	11	1409	21	1405	12	1449	48	99.4354	100.285	1405	12	73.211	50.02	61.6155
82	Trinidad64_1_7	8	8583c_TRA_Data	2018-11-16	12.499	63	50.3	1.03777	15	11533.3	0.0037	no	2.93	0.12	0.2409	0.0053	0.59798	4.1511	0.077	0.0892	0.0022	0.073	0.0019	1388	31	1391	28	1407	23	1424	37	100.216	98.8628	1407	23	69.908	58.805	64.3565
83	Trinidad_64__0	49	8462c_TRA_Data	2018-11-04	19.466	98	150.3	1.47505	28	14414.3	0.0292	no	2.547	0.062	0.2073	0.0057	0.65097	4.82393	0.042	0.0892	0.00095	0.07178	0.0015	1285	18	1214.3	31	1408	11	1401	28	94.4981	86.2429	1408	11	77.776	45.892	61.834
84	Trinidad_64__16	10711	8478c_TRA_Data	2018-11-04	13.919	71	363.5	1.0641	47	18702.1	0.00107	no	3.141	0.044	0.2592	0.0042	0.77131	3.85803	0.06	0.0893	0.00096	0.0737	0.0027	1442	11	1485	22	1409	12	1436	51	102.982	105.394	1409	12	74.413	67.809	71.111
85	Trinidad_64__8	43209	8479c_TRA_Data	2018-11-04	24.916	125	284.9	1.65672	7	89142.9	0.02	no	2.812	0.048	0.226	0.0031	0.69345	4.42478	0.042	0.0892	0.0017	0.07484	0.0018	1357.6	13	1313	16	1409.4	22	1458	33	96.7148	93.1602	1409.4	22	71.167	49.835	60.501
86	Trinidad_64__2	41205	8479c_TRA_Data	2018-11-04	13.102	66	268.4	1.0693	13	46000	0.0015	no	2.973	0.049	0.2413	0.0036	0.54369	4.14422	0.048	0.08933	0.0018	0.0741	0.002	1400.3	13	1393	19	1410	20	1444	37	99.4787	98.7943	1410	20	108.198	33.375	70.7865
87	Trinidad_64__13	55868	8482c_TRA_Data	2018-11-04	10.737	54	1050	0.534286	122	22049.2	0.00083	no	3.046	0.056	0.2449	0.0045	0.6071	4.0833	0.052	0.09025	0.0016	0.0712	0.0046	1419	14	1412	23	1430	19	1391	87	99.5067	98.7413	1430	19	98.169	38.932	68.5505
88	Trinidad_64__0	8044	8477c_TRA_Data	2018-11-04	14.23	71	899	2.93993	36	61888.9	0.00112	no	3.043	0.034	0.2467	0.0032	0.4818	4.05351	0.045	0.09039	0.00097	0.06202	0.0021	1418	8.5	1421	17	1432	13	1216	41	100.212	99.2318	1432	13	68.419	49.599	59.009
89	Trinidad_64__6	21742	8469c_TRA_Data	2018-11-04	9.775	49	47.2	0.978814	14	8307.14	-0.001	no	3.019	0.13	0.2424	0.009	0.60563	4.12541	0.1	0.0909	0.0024	0.0623	0.0026	1410	33	1398	47	1441	27	1230	54	99.1489	97.016	1441	27	81.36	59.964	70.662
90	Trinidad64_1_4	5	8582c_TRA_Data	2018-11-16	25.326	128	597	0.736516	25	85000	0.0092	no	3.05	0.11	0.236	0.0035	0.44344	4.23729	0.031	0.09145	0.0017	0.07891	0.00088	1419.8	28	1365.9	18	1454.3	20	1535	17	96.2037	93.9215	1454.3	20	65.709	58.121	61.915
91	Trinidad_64__2	34189	8474c_TRA_Data	2018-11-04	12.397	62	571	0.298424	9	169333	-0.0002	no	3.194	0.05	0.2544	0.005	0.85336	3.93082	0.053	0.09173	0.00075	0.0703	0.0026	1455	12	1461	26	1463.1	9.4	1374	49	100.412	99.8565	1463.1	9.4	74.008	45.467	59.7375
92	Trinidad_64__1	4439	8464c_TRA_Data	2018-11-04	8.3826	42	166.4	0.484375	54	7609.26	0.0071	no	3.178	0.093	0.2467	0.0066	0.55114	4.05351	0.11	0.0935	0.0022	0.085	0.003	1450	23	1421	34	1497	20	1649	55	98	94.9232	1497	20	73.462	48.851	61.1565
93	Trinidad64_1_14	15	8583c_TRA_Data	2018-11-16	12.436	63	213.7	1.09967	131	6297.71	0.0167	no	3.236	0.12	0.2458	0.0039	0.34004	4.06835	0.039	0.0951	0.0019	0.0836	0.0015	1465.3	29	1417	20	1528	22	1623	27	96.7037	92.7356	1528	22	84.983	38.137	61.56
94	Trinidad_64__16	17688	8468c_TRA_Data	2018-11-04	11.889	60	1795	0.393872	660	9393.94	7e-05	no	3.791	0.099	0.281	0.0081	0.43669	3.55872	0.073	0.0972	0.0019	0.0794	0.0014	1590	21	1595	41	1566	32	1545	26	100.314	101.852	1566	32	77.359	48.009	62.684
95	Trinidad_64__10	31489	8472c_TRA_Data	2018-11-04	12.426	62	258	0.581783	59	13559.3	4e-05	no	3.947	0.056	0.2847	0.0065	0.67921	3.51247	0.039	0.09891	0.0014	0.0791	0.0026	1622.8	12	1615	33	1603.2	14	1539	49	99.5193	100.736	1603.2	14	78.932	45.832	62.382
96	Trinidad_64__12	43665	8480c_TRA_Data	2018-11-04	18.904	95	311	1.16077	42	20023.8	0.0014	no	4.066	0.072	0.2929	0.0046	0.77478	3.41413	0.043	0.10075	0.0019	0.0875	0.0029	1646.3	15	1656	23	1636.6	20	1694	55	100.589	101.185	1636.6	20	69.145	52.316	60.7305
97	Trinidad_64__9	31439	8472c_TRA_Data	2018-11-04	20.709	104	165.4	0.840387	11	46818.2	-0.00017	no	4.108	0.053	0.2919	0.0063	0.75149	3.42583	0.027	0.10079	0.0013	0.07458	0.0024	1656.3	11	1651	31	1638.9	14	1454	44	99.68	100.738	1638.9	14	79.475	46.147	62.811
98	Trinidad_64__9	9994	8477c_TRA_Data	2018-11-04	22.012	111	1983	0.305598	3210	1769.47	0.00161	no	4.063	0.07	0.2913	0.0063	0.73884	3.43289	0.075	0.1013	0.0013	0.0959	0.004	1644	14	1646	32	1644	18	1849	74	100.122	100.122	1644	18	73.803	59.071	66.437
99	Trinidad_64__4	12137	8467c_TRA_Data	2018-11-04	21.129	105	16.3	1.23681	11	15681.8	0.0017	no	3.966	0.1	0.2925	0.0074	0.75212	3.4188	0.054	0.1011	0.0011	0.0858	0.0014	1625	21	1653	37	1645	12	1663	27	101.723	100.486	1645	12	83.525	37.885	60.705
100	Trinidad_64__5	9391	8477c_TRA_Data	2018-11-04	12.718	63	128.6	0.818818	66	5822.73	0.00015	no	4.3	0.073	0.31	0.0055	0.70965	3.22581	0.053	0.1017	0.0013	0.0882	0.0033	1692	14	1740	27	1656	15	1708	61	102.837	105.072	1656	15	126.504	41.038	83.771
101	Trinidad_64__12	14266	8468c_TRA_Data	2018-11-04	19.326	97	219.3	0.743274	5	158000	0.0009	no	4.223	0.11	0.2988	0.0072	0.74528	3.34672	0.046	0.102	0.001	0.0937	0.0026	1677	20	1685	36	1661	9.1	1810	47	100.477	101.445	1661	9.1	81.95	30.778	56.364
102	Trinidad_64__7	42183	8479c_TRA_Data	2018-11-04	16.014	81	91.9	0.463547	55	4338.18	0.0073	no	3.945	0.074	0.2769	0.0045	0.53984	3.61141	0.047	0.1021	0.0022	0.0941	0.0026	1622	15	1575	23	1661	26	1817	48	97.1023	94.8224	1661	26	94.462	63.077	78.7695
103	Trinidad_64__0	40656	8479c_TRA_Data	2018-11-04	17.57	88	172	0.427907	8	59125	0.0026	no	4.163	0.071	0.295	0.0045	0.58843	3.38983	0.04	0.1022	0.002	0.0991	0.0026	1665.9	14	1666	23	1667	23	1910	48	100.006	99.94	1667	23	71.273	45.646	58.4595
104	Trinidad_64__1	479	8462c_TRA_Data	2018-11-04	17.115	86	104	0.971154	56	6258.93	0.0159	no	3.776	0.099	0.2678	0.008	0.7225	3.73413	0.053	0.1025	0.0013	0.0886	0.002	1586	21	1529	41	1669	14	1715	37	96.4061	91.6117	1669	14	76.853	49.978	63.4155
105	Trinidad_64__10	10059	8477c_TRA_Data	2018-11-04	18.824	95	148.5	1.26263	18	24611.1	8e-06	no	4.378	0.054	0.3109	0.0039	0.68363	3.21647	0.033	0.10258	0.00088	0.0849	0.0028	1707	10	1745	19	1671.3	9.4	1647	52	102.226	104.41	1671.3	9.4	66.613	64.847	65.73
106	Trinidad_64__8	30988	8472c_TRA_Data	2018-11-04	15.547	76	311.6	0.738126	48	19562.5	0.0018	no	4.193	0.054	0.2943	0.0069	0.45772	3.39789	0.041	0.1025	0.0016	0.0886	0.0032	1672.1	10	1663	34	1673	16	1715	59	99.4558	99.4023	1673	16	71.746	45.841	58.7935
107	Trinidad_64__1	8102	8477c_TRA_Data	2018-11-04	14.4	73	73	1.32466	16	13962.5	0.00069	no	4.275	0.072	0.3029	0.0046	0.67073	3.30142	0.046	0.1028	0.0014	0.0873	0.003	1689	13	1709	24	1674	15	1691	55	101.184	102.091	1674	15	78.632	41.577	60.1045
108	Trinidad_64__2	10998	8467c_TRA_Data	2018-11-04	16.929	85	62.7	0.322807	15	49733.3	-3e-05	no	4.264	0.1	0.3125	0.007	0.72065	3.2	0.033	0.10282	0.00079	0.084	0.0013	1685.7	19	1753	34	1677.4	8.2	1630	24	103.992	104.507	1677.4	8.2	69.739	52.482	61.1105
109	Trinidad_64__1	33897	8474c_TRA_Data	2018-11-04	17.731	90	39.3	1.02061	30	4266.67	0.0003	no	4.375	0.096	0.3075	0.0066	0.784	3.25203	0.058	0.1031	0.0014	0.0831	0.003	1704	18	1732	31	1679	14	1614	57	101.643	103.157	1679	14	71.761	47.477	59.619
110	Trinidad_64__10	22612	8469c_TRA_Data	2018-11-04	5.5106	28	406	0.437192	27	42407.4	0.004	no	4.013	0.15	0.2836	0.0089	0.59143	3.52609	0.062	0.1031	0.0019	0.0905	0.0038	1636	31	1609	44	1681	18	1750	71	98.3496	95.7168	1681	18	86.815	52.725	69.77
111	Trinidad_64__13	44801	8480c_TRA_Data	2018-11-04	23.99	121	73.6	1.04076	43	4351.16	0.0108	no	3.807	0.073	0.2691	0.0043	0.759	3.71609	0.048	0.10307	0.002	0.0853	0.0022	1594	16	1536	22	1682	23	1653	41	96.3614	91.3199	1682	23	67.351	60.495	63.923
112	Trinidad_64__12	32246	8473c_TRA_Data	2018-11-04	28.377	142	169.9	0.490288	23	22917.4	0.00042	no	4.176	0.05	0.296	0.0064	0.71396	3.37838	0.028	0.10331	0.0013	0.08321	0.0027	1668.5	9.8	1671	32	1684.5	12	1615	49	100.15	99.1986	1684.5	12	61.059	55.461	58.26
113	Trinidad_64__13	10500	8478c_TRA_Data	2018-11-04	13.266	67	247	1.2915	41	16122	-0.0029	no	4.089	0.063	0.2906	0.0046	0.85663	3.44116	0.05	0.1035	0.00073	0.0768	0.0027	1651	13	1644	23	1684.7	8.1	1495	51	99.576	97.5841	1684.7	8.1	78.058	55.898	66.978
114	Trinidad_64__2	8299	8477c_TRA_Data	2018-11-04	25.751	130	541	0.300924	93	17150.5	-0.0053	no	4.052	0.025	0.2827	0.0027	0.56724	3.53732	0.023	0.1034	0.00057	0.0569	0.002	1644.3	4.9	1604.5	13	1685.6	6.1	1119	39	97.5795	95.1887	1685.6	6.1	126.738	22.401	74.5695
115	Trinidad_64__7	21930	8469c_TRA_Data	2018-11-04	25.132	126	307	0.168078	28	34857.1	0.00101	no	4.267	0.16	0.2985	0.0098	0.93097	3.35008	0.064	0.10348	0.0013	0.089	0.003	1685	31	1686	49	1686.6	12	1722	55	100.059	99.9644	1686.6	12	58.255	54.796	56.5255
116	Trinidad_64__11	38354	8475c_TRA_Data	2018-11-04	17.868	87	161	0.588199	89	5539.33	0.0031	no	4.21	0.054	0.2943	0.0055	0.62959	3.39789	0.049	0.1035	0.0011	0.0926	0.0037	1675.1	11	1662	27	1687	12	1789	68	99.218	98.5181	1687	12	63.02	49.264	56.142
117	Trinidad_64__13	15086	8468c_TRA_Data	2018-11-04	17.874	90	122.8	0.878664	27	16074.1	0.0049	no	4.204	0.1	0.2926	0.0067	0.66037	3.41764	0.039	0.1035	0.001	0.0906	0.0012	1673.8	20	1654	33	1687.5	9.8	1752	22	98.8171	98.0148	1687.5	9.8	67.856	53.752	60.804
118	Trinidad_64__11	6175	8465c_TRA_Data	2018-11-04	26.347	133	314.3	0.565065	19	50000	0.00247	no	4.119	0.082	0.2868	0.0033	0.63442	3.48675	0.025	0.10351	0.001	0.0895	0.0021	1658.3	17	1626	17	1687.7	11	1732	38	98.0522	96.3441	1687.7	11	70.61	52.581	61.5955
119	Trinidad_64__14	32430	8473c_TRA_Data	2018-11-04	24.834	125	108.5	0.730876	21	15761.9	0.0022	no	4.132	0.063	0.2932	0.0069	0.68813	3.41064	0.042	0.10378	0.0015	0.0858	0.0029	1661	13	1657	34	1688	16	1668	55	99.7592	98.1635	1688	16	87.174	41.511	64.3425
120	Trinidad_64__7	48464	8481c_TRA_Data	2018-11-04	9.8208	48	498	0.584337	54	26722.2	0.002	no	4.231	0.084	0.2969	0.0056	0.69494	3.36814	0.048	0.1037	0.0018	0.0865	0.0058	1679	17	1675	28	1689	21	1677	110	99.7618	99.1711	1689	21	64.605	55.515	60.06
121	Trinidad_64__6	1181	8462c_TRA_Data	2018-11-04	25.642	128	98.8	1.06579	5	54980	0.0092	no	4	0.1	0.2802	0.008	0.72399	3.56888	0.04	0.10368	0.0011	0.0867	0.0018	1632.9	20	1592	40	1689.4	12	1680	33	97.4953	94.2346	1689.4	12	80.329	47.193	63.761
122	Trinidad_64__11	13687	8468c_TRA_Data	2018-11-04	13.388	67	260	0.792308	36	23833.3	0.0182	no	3.916	0.096	0.2726	0.0069	0.55189	3.66838	0.059	0.1036	0.0015	0.094	0.0023	1618	19	1553	35	1691	11	1815	42	95.9827	91.8391	1691	11	68.914	46.679	57.7965
123	Trinidad_64__15	58725	8484c_TRA_Data	2018-11-04	24.877	125	255	0.709804	29	25551.7	-0.0025	no	4.323	0.084	0.3011	0.0049	0.87395	3.32116	0.04	0.10406	0.0011	0.0747	0.0036	1697	16	1696	24	1695.8	11	1453	67	99.9411	100.012	1695.8	11	65.673	35.818	50.7455
124	Trinidad_64__15	6997	8465c_TRA_Data	2018-11-04	25.106	127	809	0.614339	40	56750	0.00275	no	3.997	0.082	0.2781	0.0037	0.75367	3.59583	0.034	0.10414	0.001	0.084	0.002	1632.8	17	1581	19	1696.5	11	1630	37	96.8275	93.1919	1696.5	11	70.683	46.691	58.687
125	Trinidad_64__5	41565	8479c_TRA_Data	2018-11-04	26.518	133	280.8	0.564815	4	202750	0.0038	no	4.177	0.063	0.2917	0.0037	0.60336	3.42818	0.028	0.1041	0.0019	0.0943	0.0022	1668.9	12	1651	19	1697.4	20	1822	40	98.9274	97.2664	1697.4	20	67.479	49.365	58.422
126	Trinidad_64__0	10723	8467c_TRA_Data	2018-11-04	14.198	71	99.4	0.780684	165	5048.48	0.0015	no	4.152	0.096	0.2995	0.0069	0.62316	3.3389	0.04	0.1041	0.001	0.0905	0.0017	1664.1	19	1689	34	1698	12	1750	32	101.496	99.47	1698	12	93.255	45.817	69.536
127	Trinidad_64__0	33514	8474c_TRA_Data	2018-11-04	8.2889	42	226.8	0.475309	85	8117.65	0.0061	no	4.09	0.076	0.2886	0.0069	0.621	3.465	0.072	0.1041	0.0018	0.095	0.004	1651	15	1634	34	1698	17	1834	75	98.9703	96.2309	1698	17	79.841	41.687	60.764
128	Trinidad_64__7	29013	8472c_TRA_Data	2018-11-04	23.257	117	341	1.05865	44	23886.4	-0.00029	no	4.232	0.054	0.2922	0.0065	0.72085	3.42231	0.033	0.10415	0.0013	0.08134	0.0026	1679.5	10	1652	32	1699.1	14	1580	48	98.3626	97.2279	1699.1	14	83.178	42.826	63.002
129	Trinidad_64__14	6649	8465c_TRA_Data	2018-11-04	24.054	121	882	0.571769	13	180000	0.003	no	3.784	0.076	0.2625	0.0032	0.56833	3.80952	0.032	0.10421	0.0011	0.0796	0.0019	1589.8	16	1502	17	1699.3	11	1547	35	94.4773	88.3893	1699.3	11	79.221	46.041	62.631
130	Trinidad_64__12	28977	8484c_TRA_Data	2018-11-04	10.173	51	327	1.11927	73	13356.2	0.0017	no	4.34	0.089	0.3015	0.0058	0.93562	3.31675	0.053	0.10418	0.0011	0.0177	0.0012	1700	17	1698	29	1699.8	12	355	24	99.8824	99.8941	1699.8	12	60.322	53.029	56.6755
131	Trinidad_64__7	66946	8483c_TRA_Data	2018-11-04	11.408	58	153.9	0.831709	141	3212.77	0.0028	no	4.352	0.094	0.3026	0.0068	0.77095	3.30469	0.067	0.1042	0.0016	0.0717	0.0051	1702	18	1703	34	1700	16	1396	96	100.059	100.176	1700	16	96.178	42.471	69.3245
132	Trinidad_64__7	12574	8467c_TRA_Data	2018-11-04	9.0667	45	475	0.748632	40	35350	0.006	no	4.17	0.098	0.2897	0.0067	0.53903	3.45185	0.042	0.1043	0.0012	0.093	0.0018	1667.7	19	1640	34	1701	11	1797	33	98.339	96.4139	1701	11	66.85	51.805	59.3275
133	Trinidad_64__9	37743	8474c_TRA_Data	2018-11-04	17.847	90	400	0.5225	27	47037	0.0012	no	4.332	0.053	0.3008	0.0049	0.68683	3.32447	0.035	0.10442	0.00092	0.0885	0.0043	1698.6	10	1695	24	1705.3	9.5	1712	80	99.7881	99.396	1705.3	9.5	95.466	45.998	70.732
134	Trinidad_64__16	45459	8480c_TRA_Data	2018-11-04	19.972	101	493	0.235294	53	26113.2	-0.0024	no	4.25	0.08	0.2979	0.0042	0.80909	3.35683	0.033	0.10444	0.002	0.0662	0.003	1682	16	1680	21	1706	26	1294	57	99.8811	98.476	1706	26	77.756	46.569	62.1625
135	Trinidad_64__3	8489	8477c_TRA_Data	2018-11-04	20.337	103	325	1.74154	264	3954.55	0.001	no	4.464	0.075	0.3061	0.0045	0.85664	3.26691	0.042	0.10494	0.00095	0.0929	0.0033	1722	14	1721	22	1709	14	1795	60	99.9419	100.702	1709	14	76.175	54.305	65.24
136	Trinidad_64__6	48260	8481c_TRA_Data	2018-11-04	26.63	134	659	0.608498	27	75592.6	0.0008	no	4.413	0.077	0.3069	0.0045	0.56425	3.25839	0.025	0.10492	0.0016	0.0902	0.0058	1714.2	14	1725	22	1711	15	1745	110	100.63	100.818	1711	15	73.14	63.852	68.496
137	Trinidad_64__5	61650	8483c_TRA_Data	2018-11-04	25.228	127	675	0.557037	279	7168.46	-0.0045	no	4.362	0.085	0.303	0.0059	0.93329	3.30033	0.056	0.10505	0.0011	0.0656	0.0025	1703	16	1705	29	1715.2	13	1284	48	100.117	99.4053	1715.2	13	76.483	50.189	63.336
138	Trinidad_64__4	28686	8472c_TRA_Data	2018-11-04	23.846	120	291	0.752577	116	7810.34	-0.0061	no	4.271	0.059	0.2949	0.0066	0.75242	3.39098	0.034	0.10505	0.0014	0.0662	0.0024	1686.7	11	1665	33	1716.7	12	1294	45	98.7135	96.9884	1716.7	12	91.836	43.435	67.6355
139	Trinidad64_1_10	11	8583c_TRA_Data	2018-11-16	21.724	110	376	0.220213	76	22644.7	0.00094	no	4.48	0.17	0.3065	0.006	0.83825	3.26264	0.048	0.10518	0.002	0.0997	0.0017	1726	32	1722	30	1718.3	19	1921	31	99.7683	100.215	1718.3	19	106.875	53.429	80.152
140	Trinidad_64__14	10654	8478c_TRA_Data	2018-11-04	15.305	77	563	0.179396	109	14596.3	0.0023	no	4.318	0.06	0.3007	0.0055	0.80287	3.32557	0.059	0.1055	0.001	0.0754	0.0072	1696	11	1694	28	1721	13	1460	140	99.8821	98.4311	1721	13	92.044	38.76	65.402
141	Trinidad64_1_5	6	8583c_TRA_Data	2018-11-16	28.125	142	123.7	0.505255	137	4160.58	0.0014	no	4.514	0.17	0.3114	0.0046	0.52453	3.2113	0.024	0.10567	0.002	0.0958	0.0013	1733.7	32	1749	23	1723.5	24	1849	24	100.883	101.48	1723.5	24	90.551	32.301	61.426
142	Trinidad_64__4	4997	8464c_TRA_Data	2018-11-04	20.753	104	1134	0.141975	39	87435.9	0.00131	no	4.06	0.081	0.2784	0.0035	0.55859	3.59195	0.03	0.10531	0.0012	0.0876	0.002	1646.9	17	1583	18	1725.4	12	1697	37	96.12	91.7468	1725.4	12	64.624	54.022	59.323
143	Trinidad_64__2	4515	8464c_TRA_Data	2018-11-04	6.9127	34	926	0.530238	20	142350	-0.0019	no	4.324	0.098	0.2952	0.0057	0.73223	3.38753	0.057	0.1057	0.0015	0.076	0.0022	1697	19	1667	28	1726	17	1481	41	98.2322	96.5817	1726	17	64.818	46.831	55.8245
144	Trinidad_64__5	28815	8472c_TRA_Data	2018-11-04	5.6881	29	512	0.804688	110	14218.2	0.0008	no	4.485	0.086	0.3067	0.0082	0.71186	3.26051	0.05	0.1062	0.0018	0.0888	0.0033	1728	16	1724	41	1732	19	1719	62	99.7685	99.5381	1732	19	70.705	51.477	61.091
145	Trinidad64_1_12	13	8583c_TRA_Data	2018-11-16	23.537	119	299.5	0.527212	36	35277.8	0.0103	no	4.149	0.15	0.281	0.0042	0.47571	3.55872	0.029	0.10613	0.002	0.09594	0.00098	1663.5	30	1596	21	1734.6	17	1851	18	95.9423	92.0097	1734.6	17	79.404	37.323	58.3635
146	Trinidad_64__15	45341	8480c_TRA_Data	2018-11-04	13.451	68	1814	0.496692	53	85056.6	-0.0128	no	3.993	0.068	0.2738	0.0039	0.83708	3.6523	0.038	0.10641	0.0019	0.0609	0.002	1632.1	14	1563	21	1735.9	22	1195	38	95.7662	90.0397	1735.9	22	91.505	39.608	65.5565
147	Trinidad_64__6	28899	8472c_TRA_Data	2018-11-04	7.8572	40	284	0.605634	32	28375	0	no	4.764	0.091	0.3236	0.0083	0.70691	3.09023	0.05	0.1066	0.0018	0.0923	0.0033	1778	16	1807	41	1743	16	1784	60	101.631	103.672	1743	16	83	45	64
148	Trinidad_64__13	39347	8475c_TRA_Data	2018-11-04	17.893	90	128.1	0.587041	177	2338.98	0.0027	no	4.572	0.08	0.3084	0.0049	0.60895	3.24254	0.034	0.1074	0.0012	0.0967	0.0036	1742	15	1735	25	1750	15	1866	66	99.5982	99.1429	1750	15	96.005	42.71	69.3575
149	Trinidad_64__10	51950	8482c_TRA_Data	2018-11-04	26.133	132	143.4	0.589958	10	46400	0.00018	no	4.639	0.086	0.3151	0.0048	0.78279	3.1736	0.026	0.10711	0.0016	0.0865	0.0055	1755.3	15	1765	23	1750.6	16	1676	100	100.553	100.823	1750.6	16	86.5	52.058	69.279
150	Trinidad_64__0	1671	8485c_TRA_Data	2018-11-04	22.781	115	851	0.411281	1	2418000	0.0042	no	4.324	0.14	0.2923	0.011	0.57395	3.42114	0.029	0.10758	0.0013	0.0929	0.003	1697.4	26	1652	55	1755.6	13	1795	55	97.3253	94.0989	1755.6	13	63.607	62.089	62.848
151	Trinidad_64__3	20258	8469c_TRA_Data	2018-11-04	9.6446	48	1415	0.514488	10	415000	0.0049	no	4.272	0.15	0.2885	0.0081	0.56644	3.4662	0.039	0.10805	0.0014	0.0904	0.0028	1687.7	28	1634	40	1762.9	14	1749	53	96.8182	92.6882	1762.9	14	68.698	53.005	60.8515
152	Trinidad_64__3	873	8462c_TRA_Data	2018-11-04	13.333	67	820	0.315854	19	150105	0.00271	no	4.298	0.11	0.2886	0.0082	0.67547	3.465	0.039	0.1081	0.0013	0.0899	0.002	1692.4	20	1634	41	1765	14	1740	38	96.5493	92.5779	1765	14	61.876	53.527	57.7015
153	Trinidad_64__1	41070	8479c_TRA_Data	2018-11-04	15.985	81	1133	0.0337158	179	16357.5	0.00275	no	3.947	0.067	0.2651	0.0037	0.40233	3.77216	0.036	0.1081	0.0022	0.1254	0.0044	1622.7	14	1516	19	1765	24	2386	79	93.4245	85.8924	1765	24	100.35	42.484	71.417
154	Trinidad_64__11	2565	8463c_TRA_Data	2018-11-04	10.676	53	232	0.433621	80	8825	0.0033	no	4.535	0.11	0.3036	0.0092	0.74954	3.29381	0.048	0.1081	0.0013	0.0958	0.0023	1736.9	21	1708	45	1768	13	1849	43	98.3361	96.6063	1768	13	69.448	50.966	60.207
155	Trinidad_64__9	43333	8479c_TRA_Data	2018-11-04	8.7904	44	632	0.280696	77	23402.6	0.0017	no	4.78	0.099	0.316	0.0058	0.83463	3.16456	0.049	0.1082	0.0021	0.102	0.0029	1780	17	1770	28	1769	25	1963	53	99.4382	100.057	1769	25	81.669	51.411	66.54
156	Trinidad_64__15	56217	8482c_TRA_Data	2018-11-04	9.9354	51	285.9	0.312697	27	34481.5	6e-06	no	4.683	0.091	0.3174	0.0057	0.55063	3.1506	0.038	0.1081	0.0019	0.0899	0.0059	1763.7	16	1777	28	1769	19	1740	110	100.754	100.452	1769	19	66.363	51.93	59.1465
157	Trinidad_64__2	808	8462c_TRA_Data	2018-11-04	8.1108	41	637	0.703297	40	56050	0.0047	no	4.505	0.11	0.3016	0.0088	0.6077	3.31565	0.042	0.1079	0.0013	0.0941	0.0025	1731.4	21	1699	44	1770	14	1817	47	98.1287	95.9887	1770	14	74.612	49.657	62.1345
158	Trinidad_64__11	10074	8478c_TRA_Data	2018-11-04	19.587	99	219.7	0.524351	73	9561.64	0	no	5.04	0.059	0.3382	0.0044	0.69521	2.95683	0.033	0.10877	0.0009	0.0937	0.0032	1828.1	9.3	1877	21	1781	7.7	1811	59	102.675	105.39	1781	7.7	79.854	46.321	63.0875
159	Trinidad_64__9	1646	8462c_TRA_Data	2018-11-04	24.347	122	1324	0.164426	11	361818	0.00143	no	4.433	0.1	0.2907	0.0078	0.50118	3.43997	0.019	0.11059	0.0011	0.0892	0.0018	1717.9	20	1644.8	39	1808.8	14	1727	33	95.7448	90.9332	1808.8	14	92.953	49.956	71.4545
160	Trinidad_64__1	18943	8469c_TRA_Data	2018-11-04	13.612	69	1007	0.202582	415	7204.82	-0.0005	no	4.389	0.15	0.2864	0.0079	0.75115	3.49162	0.035	0.11142	0.0013	0.0524	0.0073	1709.8	28	1623	40	1822.7	14	1020	140	94.9234	89.0437	1822.7	14	117.087	33.417	75.252
161	Trinidad_64__4	60236	8483c_TRA_Data	2018-11-04	19.54	99	251	0.596016	103	7970.87	0.00019	no	5.094	0.084	0.3288	0.0049	0.76822	3.04136	0.031	0.11283	0.0012	0.0914	0.0033	1835.6	15	1832	24	1845.1	12	1768	60	99.8039	99.29	1845.1	12	87.88	51.897	69.8885
162	Trinidad_64__11	31499	8473c_TRA_Data	2018-11-04	21.524	109	738	0.184282	1580	1386.08	0.0098	no	4.8	0.13	0.2912	0.0063	0.30059	3.43407	0.027	0.1204	0.0032	0.0844	0.0051	1778	23	1647	31	1947	46	1633	96	92.6322	84.5917	1947	46	62.485	53.218	57.8515
163	Trinidad64_1_2	3	8582c_TRA_Data	2018-11-16	10.865	54	333.3	0.209421	1	1583000	0.00284	no	6.087	0.23	0.3348	0.0059	0.43746	2.98686	0.036	0.1278	0.0028	0.1063	0.0019	1988	33	1861	28	2067	20	2041	35	93.6117	90.0339	2067	20	65.341	47.711	56.526
	Discordant Analyses (More than +5 to -10% '68/75' discordance for <1100Ma '6/8' age; +5 to -15% '68/76' discordance for ≥1100Ma '7/6' age)
164	Trinidad_64__16	7310	8465c_TRA_Data	2018-11-04	14.653	74	162.8	1.83231	14	2818.57	0.0175	yes	0.1387	0.0028	0.02182	0.00046	0.99564	45.98	0.84	0.0460795	8.6e-06	0.00793	0.00024	131.8	2.5	139.1	2.9	1.78	0.45	159.6	4.9	105.539	7814.61	139.1	2.9	67.392	49.844	58.618
165	Trinidad_64__14	41859	8484c_TRA_Data	2018-11-04	16.273	82	3400	1.07941	1180	4677.97	0.0206	no	2.006	0.04	0.1653	0.0045	0.71294	6.04961	0.15	0.0882	0.0017	0.0223	0.0013	1116.8	13	985	25	1382	32	445	26	88.1984	71.2735	1382	32	48.916	37.649	43.2825
166	Trinidad_64__8	48614	8481c_TRA_Data	2018-11-04	25.574	129	2730	0.494139	1007	4826.22	0.0056	no	2.172	0.038	0.1768	0.0029	0.71682	5.65611	0.062	0.08969	0.0014	0.05535	0.0035	1171.7	12	1049	16	1415.9	18	1089	67	89.528	74.0872	1415.9	18	77	45	61
167	Trinidad64_1_8	9	8583c_TRA_Data	2018-11-16	14.868	75	1076	0.127138	21	155048	0.00547	no	2.641	0.1	0.2101	0.0044	0.75748	4.75964	0.078	0.09161	0.0019	0.0812	0.0016	1311.6	28	1229	23	1458	20	1578	30	93.7023	84.2936	1458	20	68.255	46.057	57.156
168	Trinidad_64__16	40426	8475c_TRA_Data	2018-11-04	13.917	70	4060	0.497291	820	9963.41	0.0186	no	2.469	0.024	0.1923	0.0034	0.35862	5.20021	0.071	0.0937	0.0012	0.0288	0.0018	1262.6	7.1	1134	18	1503	13	574	35	89.8147	75.4491	1503	13	100.799	38.157	69.478
169	Trinidad_64__2	18985	8469c_TRA_Data	2018-11-04	21.794	109	867	0.131488	71	26225.4	0.0113	no	2.613	0.09	0.1983	0.0054	0.55833	5.04286	0.046	0.09534	0.0012	0.03376	0.0014	1303.8	25	1166.2	29	1535.8	12	671	27	89.4462	75.9344	1535.8	12	86.341	47.37	66.8555
170	Trinidad_64__3	4175	8485c_TRA_Data	2018-11-04	18.75	95	4130	0.233414	5900	1184.75	0.0171	no	2.434	0.086	0.1838	0.0076	0.53409	5.4407	0.097	0.096	0.0018	0.058	0.003	1251	25	1087	41	1546	30	1138	57	86.8905	70.3105	1546	30	84.908	45.174	65.041
171	Trinidad_64__11	52168	8482c_TRA_Data	2018-11-04	9.9424	50	166.8	0.89988	3	173667	0	no	4.296	0.091	0.3108	0.006	0.70398	3.2175	0.047	0.1005	0.0017	0.0807	0.0052	1692	17	1744	29	1633	19	1568	97	103.073	106.797	1633	19	85.01	68.864	76.937
172	Trinidad_64__3	11316	8467c_TRA_Data	2018-11-04	10.478	53	185.7	0.100431	24	87375	0	no	4.328	0.098	0.3165	0.0071	0.68653	3.15956	0.034	0.10294	0.00081	0.0854	0.0016	1698.3	19	1772	35	1678.6	7.6	1656	29	104.34	105.564	1678.6	7.6	64.984	47.727	56.3555
173	Trinidad_64__13	23077	8470c_TRA_Data	2018-11-04	5.9345	30	1355	0.476753	310	7958.06	0.0291	no	2.941	0.11	0.205	0.0064	0.55839	4.87805	0.085	0.1045	0.0022	0.0477	0.0021	1392	29	1202	34	1706	22	943	40	86.3506	70.4572	1706	22	76	49	62.5
174	Trinidad_64__6	12240	8467c_TRA_Data	2018-11-04	13.212	66	526	0.357414	283	5159.01	0.0109	no	3.393	0.081	0.2303	0.005	0.73241	4.34216	0.038	0.10644	0.00085	0.0814	0.0014	1502.2	19	1338	25	1739.1	8.4	1582	26	89.0694	76.9363	1739.1	8.4	82	33	57.5
175	Trinidad_64__4	41549	8479c_TRA_Data	2018-11-04	10.16	51	2350	0.0642553	630	7649.21	0.0142	no	3.34	0.11	0.2268	0.0077	0.94561	4.40917	0.15	0.1066	0.0021	0.0697	0.0074	1488	27	1316	41	1747	22	1360	140	88.4409	75.3291	1747	22	70.295	53.405	61.85
176	Trinidad_64__3	34250	8474c_TRA_Data	2018-11-04	28.314	143	102	0.272549	12	31416.7	1.4e-06	no	5.14	0.063	0.3425	0.0058	0.73363	2.91971	0.035	0.1072	0.00086	0.0896	0.0033	1845.4	10	1898	28	1751	8.4	1733	62	102.85	108.395	1751	8.4	68.744	55.985	62.3645
177	Trinidad_64__4	1049	8462c_TRA_Data	2018-11-04	16.084	81	860	0.763953	283	9162.54	0.0156	no	3.414	0.085	0.2315	0.0067	0.82383	4.31965	0.052	0.1073	0.0011	0.05777	0.0013	1506.9	19	1342	35	1753.9	10	1135	25	89.057	76.5152	1753.9	10	84.107	52.296	68.2015
178	Trinidad_64__8	5888	8464c_TRA_Data	2018-11-04	4.9861	25	610	0.444262	60	24333.3	0.0142	no	3.494	0.1	0.2325	0.0042	0.73849	4.30107	0.067	0.1075	0.0019	0.0806	0.0034	1525	23	1347	22	1754	24	1566	64	88.3279	76.7959	1754	24	98	40	69
179	Trinidad_64__17	45641	8480c_TRA_Data	2018-11-04	8.6987	44	178.2	0.712121	231	1752.38	0.0162	no	3.9	0.097	0.2553	0.0063	0.81653	3.91696	0.087	0.1123	0.0023	0.0425	0.0029	1612	20	1465	32	1829	27	841	57	90.8809	80.0984	1829	27	87.842	47.922	67.882
	Notes
	1 Calibration standard: 91500m zircon (U=80 ppm, Th=30 ppm) (Wiedenbeck et al., 2004)
	2 Common Pb correction made using the method of Andersen (2002), as calculated by Iolite v.3.6
	3 Data corrected for background, drift and downhole U/Pb fractionation using Iolite v.3.6 and 91500 zircon as calibration standard
	4 Uncertainties Uncertainties quoted are Iolite output of 2SE for isotopic ratios, either as internal error only and expressed as 2sint for age or propagated random errors (Internal error + Calculated excess uncertainity) and expressed as 2sprop for age (Paton et al., 2010)
	5 Dates calculated using the decay constants of Jaffey et al. (1971)
	6 Concordence calculated as (206Pb-238U age/207Pb-235U age)*100
	7 Concordance calculated as (206Pb-238U age/207Pb-206Pb age)*100
	8 If zircon age <1100Ma, preferred age is 206Pb-238U age with concordance as 90%-105%; if zircon age ≥1100Ma, Preferred age is 207Pb-206Pb age with concordance as 85%-105%.

## Sheet: Trinidad SS 20-63um 
	Table S3. U-Pb Isotope Data for Detrital Zircon, Trinidad Sandstone, Fine Fraction (Coarse Silt), Raton Basin																																	Sylvester, Souders, Liu Geology G49684
	Mineral Isotope Laser Laboratory (MILL), Texas Tech University, 20 µm spots, 2.5 J/cm2, 30 sec total ablation, 8Hz, 240 shots										Andersen (2002) Correction		U-Pb Data for Wetherill plot3					U-Pb Data for Tera-Wasserburg plot3				Th-Pb Data3		Dates (Ma)5								206Pb/238U-207Pb/235U	206Pb/238U-207Pb/206Pb			Grain dimensions
Count	File sequence	Grain-Analysis Number	Source file	Date	Duration (s)	Points	U ppm1	Th/U1	204Pb cps	206Pb/204Pb	Corrected2 Final Fraction Common Pb	Correction Used	207Pb/235U	2sprop4	206Pb/238U	2sprop4	Error Correlation Rho	238U/206Pb	2sint4	207Pb/206Pb	2sprop4	208Pb/232Th	2sprop4	207Pb/235U	2sprop4	206Pb/238U	2sprop4	207Pb/206Pb	2sprop4	208Pb/232Th	2sprop4	% Conc6	% Conc7	Preferred Age8	2sprop4	Length (mm)	Width (mm)	[Length + Width]/2
1	Trinidad_20__6	18591	8559c_TRA_Data	13/11/2018	23.619	117	1800	1.44444	49	3857.14	0.0062	no	0.0753	0.0017	0.01073	0.00023	0.6506	93.1966	1.1	0.05103	0.00091	0.003129	0.00015	73.7	1.6	68.77	1.5	243	30	63.1	3.1	93.3107	28.3004	68.77	1.5	63.587	42.817	53.202
2	Trinidad_20__7	8	8537c_TRA_Data	13/11/2018	25.531	129	320	0.509375	5	9020	0.0017	no	0.0719	0.0015	0.01096	0.00011	0.02	91.2409	0.89	0.04725	0.001	0.00349	0.0001	70.4	1.4	70.29	0.7	170	29	70.3	2.1	99.8438	41.3471	70.29	0.7	57.104	35.697	46.4005
3	Trinidad_20__2	4811	8557c_TRA_Data	13/11/2018	16.594	83	329	0.121884	24	1583.33	0.0047	no	0.0765	0.0037	0.01103	0.00033	0.21197	90.6618	1.8	0.05	0.0021	0.00407	0.00039	74.8	3.5	70.7	2.1	314	62	82	7.8	94.5187	22.5159	70.7	2.1	79.164	41.37	60.267
4	Trinidad_20__3	65418	8565c_TRA_Data	13/11/2018	8.0851	40	181.6	0.467511	15	1213.33	0.0039	no	0.0757	0.0036	0.01104	0.00032	-0.0040381	90.5797	2.3	0.0495	0.0023	0.00375	0.0003	74	3.4	70.8	2	282	61	75.7	6.1	95.6757	25.1064	70.8	2	85.616	44.059	64.8375
5	Trinidad_20__10	79	8547c_TRA_Data	13/11/2018	24.519	124	260	0.9	29	1124.14	0.0034	no	0.0746	0.0026	0.01112	0.0002	0.095788	89.9281	1.1	0.0487	0.0015	0.00377	0.00011	73	2.5	71.3	1.3	206	28	76	2.3	97.6712	34.6117	71.3	1.3	51.365	32.497	41.931
6	Trinidad_20__10	11	8537c_TRA_Data	13/11/2018	8.2921	42	773	0.239327	-40	-2580	0.0024	no	0.0742	0.0018	0.01119	0.00023	0.26	89.3655	1.8	0.0481	0.0017	0.00315	0.00023	72.7	1.7	71.7	1.5	188	57	63.6	4.6	98.6245	38.1383	71.7	1.5	48.696	35.847	42.2715
7	Trinidad_20__15	67	8545c_TRA_Data	13/11/2018	28.214	142	195	1.12308	1	26400	0.0028	no	0.0738	0.0026	0.01122	0.00022	0.2783	89.1266	1.1	0.0482	0.0014	0.003761	0.00014	72.3	2.5	71.93	1.4	219	30	75.9	2.9	99.4882	32.8447	71.93	1.4	51.5	43.587	47.5435
8	Trinidad_20__15	25389	8560c_TRA_Data	13/11/2018	7.3827	37	371	0.271159	43	872.093	0.0042	no	0.0761	0.0036	0.01123	0.00029	0.28904	89.0472	1.7	0.0496	0.0023	0.00346	0.00034	74.4	3.4	72	1.8	262	52	69.8	6.8	96.7742	27.4809	72	1.8	86.945	34.703	60.824
9	Trinidad_20__14	66	8545c_TRA_Data	13/11/2018	25.983	131	62.8	0.449045	6	1440	0.0027	no	0.0763	0.0043	0.01131	0.00027	0.099801	88.4173	1.6	0.0486	0.0025	0.00391	0.00029	74.4	4	72.5	1.7	368	77	78.9	5.8	97.4462	19.7011	72.5	1.7	71.942	41.148	56.545
10	Trinidad_20__2	42486	8563c_TRA_Data	13/11/2018	27.624	140	213	0.938967	13	1823.08	0.0033	no	0.0768	0.0027	0.01144	0.00027	0.39137	87.4126	1.2	0.0487	0.0014	0.00376	0.00011	75.1	2.6	73.32	1.7	244	32	75.8	2.2	97.6298	30.0492	73.32	1.7	73.168	43.529	58.3485
11	Trinidad_20__16	13506	8558c_TRA_Data	13/11/2018	20.783	103	234.2	0.751494	20	1354	0.002	no	0.0753	0.0029	0.01146	0.0003	0.13211	87.26	1.2	0.0477	0.0016	0.00377	0.00015	73.7	2.8	73.4	1.9	200	36	76.1	3	99.5929	36.7	73.4	1.9	84.793	45.465	65.129
12	Trinidad_20__9	19680	8559c_TRA_Data	13/11/2018	21.454	108	287.3	0.417334	22	1456.36	0.0024	no	0.0764	0.0023	0.01146	0.00025	0.31573	87.26	1.1	0.0485	0.0014	0.00364	0.00019	74.7	2.2	73.45	1.6	199	28	73.5	3.9	98.3266	36.9095	73.45	1.6	80.917	40.043	60.48
13	Trinidad_20__1	26959	8561c_TRA_Data	13/11/2018	13.426	66	67	0.68209	9	803.333	0.0067	no	0.0799	0.0058	0.01149	0.00032	0.1	87.0322	2.3	0.0506	0.004	0.00359	0.00026	77.9	5.4	73.7	2.1	424	86	72.4	5.3	94.6085	17.3821	73.7	2.1	89.841	47.474	68.6575
14	Trinidad_20__10	75997	8566c_TRA_Data	13/11/2018	16.636	84	206	0.955825	48	460.208	0.009	no	0.084	0.0033	0.01151	0.00024	0.09	86.881	1.4	0.053	0.0022	0.00378	0.00016	81.8	3.1	73.8	1.5	363	44	76.2	3.3	90.22	20.3306	73.8	1.5	97.943	51.247	74.595
15	Trinidad_20__2	20	8540c_TRA_Data	13/11/2018	26.458	134	1523	1.25082	34	7170.59	0.00486	no	0.07934	0.00081	0.01156	0.00027	0.25694	86.5052	0.78	0.05007	0.00078	0.003335	6.7e-05	77.52	0.76	74.1	1.7	205	26	67.3	1.3	95.5882	36.1463	74.1	1.7	57.906	29.266	43.586
16	Trinidad_20__0	145	8555c_TRA_Data	13/11/2018	15.669	79	3150	0.727619	123	3065.04	0.0084	no	0.0841	0.0035	0.01157	0.00041	0.26787	86.4304	0.85	0.05081	0.00088	0.003418	8.6e-05	82	3.3	74.17	2.6	232	25	69	1.7	90.4512	31.9698	74.17	2.6	51.269	33.105	42.187
17	Trinidad_20__9	46752	8564c_TRA_Data	13/11/2018	8.6998	44	158.8	0.976071	20	855	0.0063	no	0.0794	0.0072	0.0116	0.00037	0.43845	86.2069	2.1	0.0513	0.0047	0.00385	0.00022	77.3	6.6	74.4	2.3	440	200	77.7	4.5	96.2484	16.9091	74.4	2.3	82.377	34.602	58.4895
18	Trinidad_20__15	13392	8558c_TRA_Data	13/11/2018	11.06	56	424	0.257075	24	1991.67	0.0027	no	0.0778	0.0026	0.01173	0.00031	0.17504	85.2515	1.3	0.0483	0.0014	0.00349	0.00022	76.1	2.5	75.1	2	184	39	70.4	4.4	98.6859	40.8152	75.1	2	86.302	38.743	62.5225
19	Trinidad_20__15	143	8554c_TRA_Data	13/11/2018	16.814	85	1520	1.55921	67	2701.49	0.005	no	0.0806	0.0022	0.01172	0.00017	0.064074	85.3242	0.8	0.0498	0.0016	0.003054	0.00073	78.7	2	75.13	1.1	211	65	61.6	15	95.4638	35.6066	75.13	1.1	58.368	44.588	51.478
20	Trinidad_20__2	88	8549c_TRA_Data	13/11/2018	19.398	98	441	0.462585	307	206.515	0.0716	yes	0.0749	0.0011	0.01174	0.00026	0.961	85.3	1.1	0.046179	6.5e-05	0.00378	0.00021	73.33	1	75.26	1.6	6.9	3.3	76.3	4.2	102.632	1090.72	75.26	1.6	51.37	33.362	42.366
21	Trinidad_20__13	78844	8566c_TRA_Data	13/11/2018	7.0155	35	504	0.467063	19	2742.11	0.0039	no	0.0798	0.0031	0.01175	0.00031	0.24219	85.1064	1.9	0.0494	0.0019	0.00377	0.00022	78	2.9	75.3	2	188	47	76.1	4.4	96.5385	40.0532	75.3	2	90.354	35.557	62.9555
22	Trinidad_20__8	26	8540c_TRA_Data	13/11/2018	7.6047	39	814	1.91646	96	1221.88	0.0117	no	0.0893	0.0024	0.01178	0.00034	0.13888	84.8896	1.7	0.0554	0.0016	0.003145	0.0001	86.9	2.2	75.5	2.2	411	39	63.5	2.1	86.8815	18.3698	75.5	2.2	36.886	25.923	31.4045
23	Trinidad_20__3	43044	8563c_TRA_Data	13/11/2018	11.916	60	353	0.671388	21	1866.67	0.0029	no	0.0785	0.0031	0.01189	0.00033	0.26957	84.1043	1.7	0.0481	0.0017	0.00407	0.00017	76.7	2.9	76.2	2.1	198	39	82.1	3.3	99.3481	38.4848	76.2	2.1	80.757	44.258	62.5075
24	Trinidad_20__8	8471	8558c_TRA_Data	13/11/2018	11.827	60	53.6	0.583955	34	210.882	0.0039	no	0.0803	0.0073	0.01194	0.00044	0.38793	83.7521	2.7	0.0484	0.004	0.00403	0.00032	78.1	6.9	76.5	2.8	319	74	81.2	6.4	97.9513	23.9812	76.5	2.8	70.564	42.481	56.5225
25	Trinidad_20__9	37991	8562c_TRA_Data	13/11/2018	10.712	54	190.1	0.806418	56	376.786	0.0015	no	0.0786	0.0037	0.01193	0.00029	0.26857	83.8223	1.8	0.048	0.0021	0.00384	0.00018	76.7	3.5	76.5	1.9	204	58	77.5	3.5	99.7392	37.5	76.5	1.9	61.461	45.747	53.604
26	Trinidad_20__16	144	8554c_TRA_Data	13/11/2018	14.937	76	383	1.55091	44	1063.64	0.0048	no	0.0826	0.004	0.01196	0.00022	0.35074	83.612	1.3	0.0501	0.0024	0.003555	0.00084	80.5	3.7	76.6	1.4	219	77	71.7	17	95.1553	34.9772	76.6	1.4	54.572	35.767	45.1695
27	Trinidad_20__11	49912	8564c_TRA_Data	13/11/2018	16.976	85	333	0.585886	26	1480.77	0.0023	no	0.0794	0.0025	0.012	0.00028	0.14328	83.3333	1.1	0.048	0.0014	0.004	0.00014	77.5	2.3	76.9	1.8	184	29	80.7	2.9	99.2258	41.7935	76.9	1.8	68.493	54.668	61.5805
28	Trinidad_20__16	34	8542c_TRA_Data	13/11/2018	10.492	53	206	0.781553	2	15500	0.0405	yes	0.0773	0.0022	0.01214	0.00043	0.99776	83.2	2.3	0.046097	2.6e-05	0.00449	0.00037	75.5	2.1	77.8	2.7	2.7	1.3	90.5	7.5	103.046	2881.48	77.8	2.7	44.619	24.484	34.5515
29	Trinidad_20__6	44732	8563c_TRA_Data	13/11/2018	26.627	134	477	0.800839	3	19800	0.0018	no	0.0828	0.0022	0.01254	0.00027	0.15735	79.7448	0.79	0.04792	0.00092	0.003957	7.8e-05	80.8	2	80.36	1.7	150	20	79.8	1.6	99.4554	53.5733	80.36	1.7	64.259	50.225	57.242
30	Trinidad_20__1	16189	8559c_TRA_Data	13/11/2018	26.53	134	204.1	1.95492	16	1580.62	0.0026	no	0.0835	0.0023	0.01257	0.00027	0.20501	79.5545	1	0.0485	0.0014	0.004008	0.00017	81.4	2.1	80.5	1.7	210	30	80.9	3.4	98.8943	38.3333	80.5	1.7	60.544	52.326	56.435
31	Trinidad_20__6	151	8555c_TRA_Data	13/11/2018	28.115	141	1521	1.01907	29	7279.31	0.0024	no	0.0908	0.0039	0.01377	0.0005	0.12	72.6216	0.72	0.04943	0.00099	0.003708	0.0001	88.2	3.6	88.16	3.2	178	41	74.8	2	99.9546	49.5281	88.16	3.2	53.792	32.735	43.2635
32	Trinidad_20__6	92	8549c_TRA_Data	13/11/2018	16.151	82	572	0.772727	55	1576.36	0.0013	no	0.0941	0.0034	0.01433	0.00035	0.25298	69.7837	0.63	0.04766	0.0011	0.004209	0.00011	91.3	3.2	91.75	2.2	141	28	84.9	2.1	100.493	65.0709	91.75	2.2	89.725	40.102	64.9135
33	Trinidad_20__2	16644	8559c_TRA_Data	13/11/2018	10.168	52	236.5	0.601268	187	182.032	0.076	yes	0.0914	0.0018	0.01436	0.00035	0.99548	69.9	1.3	0.046089	2.2e-05	0.00329	0.00033	88.8	1.7	91.9	2.2	2.3	1.1	66.3	6.7	103.491	3995.65	91.9	2.2	69.327	45.822	57.5745
34	Trinidad_20__13	135	8554c_TRA_Data	13/11/2018	20.619	103	299	0.792642	50	918	0.0042	no	0.1017	0.0028	0.01491	0.00024	0.18294	67.0691	0.76	0.0494	0.0015	0.00472	0.0011	98.3	2.6	95.4	1.5	210	36	95.1	22	97.0498	45.4286	95.4	1.5	56.151	40.725	48.438
35	Trinidad_20__1	42199	8563c_TRA_Data	13/11/2018	26.194	132	105.5	0.593365	24	649.167	0.0055	no	0.1033	0.0041	0.01496	0.00036	0.02	66.8449	1	0.0505	0.002	0.00452	0.00018	99.6	3.8	95.7	2.3	293	40	91.2	3.7	96.0843	32.6621	95.7	2.3	81.436	44.901	63.1685
36	Trinidad_20__15	102	8550c_TRA_Data	13/11/2018	23.963	120	1940	0.378866	607	568.369	0.0366	yes	0.1101	0.0062	0.01732	0.00062	0.99932	58.8	1.6	0.0460747	8.8e-07	0.00336	0.00027	105.9	5.6	110.7	3.9	1.528	0.046	67.8	5.5	104.533	7244.76	110.7	3.9	72.259	37.091	54.675
37	Trinidad_20__9	78	8547c_TRA_Data	13/11/2018	14.711	74	238	1.97479	98	493.878	0.101	yes	0.1182	0.0085	0.0184	0.0013	0.99546	58.5	4	0.0463	0.00017	0.00284	0.00066	112.9	7.7	117.6	8.1	13	8.7	57	13	104.163	904.615	117.6	8.1	59.801	39.857	49.829
38	Trinidad_20__6	7	8537c_TRA_Data	13/11/2018	8.3603	42	423	0.380378	142	687.324	0.005	no	0.1344	0.0046	0.0193	0.00027	0.02	51.8135	0.72	0.0506	0.0019	0.00666	0.00024	128	4.2	123.2	1.7	272	48	134.1	4.9	96.25	45.2941	123.2	1.7	52.609	36.763	44.686
39	Trinidad_20__13	82	8547c_TRA_Data	13/11/2018	12.045	60	514	1.12646	168	714.286	0.0378	yes	0.1345	0.0051	0.02107	0.00078	0.97765	48.2	1.6	0.046121	8.7e-05	0.00456	0.00053	128	4.5	134.4	4.9	3.9	4.4	92	11	105	3446.15	134.4	4.9	44.109	28.173	36.141
40	Trinidad_20__16	51	8544c_TRA_Data	13/11/2018	4.0074	20	559	0.613596	90	1540	0.0099	no	0.162	0.0077	0.02188	0.00071	0.41699	45.7038	1.2	0.0539	0.0022	0.00598	0.00043	152.3	6.8	139.5	4.5	369	74	120.4	8.6	91.5955	37.8049	139.5	4.5	52.779	26.609	39.694
41	Trinidad_20__7	42	8544c_TRA_Data	13/11/2018	15.314	76	243	1.37449	21	3133.33	0.0056	no	0.1566	0.0042	0.02242	0.00064	0.21762	44.603	1.2	0.0513	0.0017	0.00784	0.00041	147.7	3.7	142.9	4.1	288	58	157.8	8.2	96.7502	49.6181	142.9	4.1	55.769	39.017	47.393
42	Trinidad_20__7	111	8551c_TRA_Data	13/11/2018	8.8862	45	288	2.28472	28	2389.29	0.0098	no	0.1711	0.042	0.02306	0.00083	0.39234	43.3651	0.77	0.0547	0.012	0.00723	0.003	160.2	36	147	5.2	392	56	145.6	61	91.7603	37.5	147	5.2	68.505	41.224	54.8645
43	Trinidad_20__4	6640	8557c_TRA_Data	13/11/2018	18.432	92	311	1.2701	32	2371.88	0.0099	no	0.1787	0.0053	0.02392	0.00057	0.11147	41.806	0.43	0.0542	0.0012	0.00815	0.00018	166.9	4.6	152.4	3.6	375	30	164	3.7	91.3122	40.64	152.4	3.6	77.113	51.232	64.1725
44	Trinidad_20__14	32	8541c_TRA_Data	13/11/2018	20.132	101	297	1.43434	18	5244.44	0.0049	no	0.1681	0.003	0.02415	0.00064	0.53756	41.4079	0.65	0.05052	0.00099	0.00868	0.00017	157.7	2.6	153.8	4	222	24	174.6	3.3	97.5269	69.2793	153.8	4	39.752	35.617	37.6845
45	Trinidad_20__5	31373	8561c_TRA_Data	13/11/2018	16.025	81	260	1.18462	37	1748.65	0.0035	no	0.1725	0.0049	0.02504	0.00044	0.3091	39.9361	0.49	0.04958	0.0014	0.00828	0.00023	161.5	4.3	159.4	2.8	182	31	166.8	4.7	98.6997	87.5824	159.4	2.8	80.332	40.433	60.3825
46	Trinidad_20__8	43	8544c_TRA_Data	13/11/2018	4.7192	24	121.3	1.53009	1	35300	0.0047	no	0.174	0.011	0.02523	0.00083	0.13	39.6354	1.1	0.0504	0.0036	0.00912	0.00044	162.3	9.6	160.6	5.2	261	70	183.5	8.9	98.9526	61.5326	160.6	5.2	57.142	37.39	47.266
47	Trinidad_20__1	87	8549c_TRA_Data	13/11/2018	28.115	142	68.7	1.78457	35	563.429	0.0028	no	0.172	0.0074	0.02544	0.00069	0.28072	39.3082	0.58	0.0496	0.0016	0.00804	0.00018	161.4	6.2	161.9	4.3	237	34	161.9	3.7	100.31	68.3122	161.9	4.3	62.984	34.406	48.695
48	Trinidad_20__10	40962	8562c_TRA_Data	13/11/2018	9.786	49	857	0.697783	25	7964	0.002	no	0.1703	0.0047	0.02549	0.00048	0.13834	39.2311	0.59	0.0492	0.0014	0.00866	0.00037	159.6	4.1	162.3	3	181	42	174.3	7.4	101.692	89.6685	162.3	3	85.463	41.064	63.2635
49	Trinidad_20__11	21466	8560c_TRA_Data	13/11/2018	17.913	90	770	0.853247	72	2679.17	0.00388	no	0.1799	0.0028	0.02594	0.00049	0.30426	38.5505	0.32	0.05047	0.00083	0.00811	0.00033	167.9	2.4	165.1	3.1	213	21	163.3	6.7	98.3323	77.5117	165.1	3.1	57.773	44.277	51.025
50	Trinidad_20__16	17	8538c_TRA_Data	13/11/2018	5.6454	28	1164	0.445017	100	3690	0.0042	no	0.1844	0.0038	0.02646	0.00077	0.62623	37.7929	1.2	0.0513	0.0012	0.00801	0.00058	171.8	3.2	168.3	4.9	253	35	161	12	97.9627	66.5217	168.3	4.9	38.065	30.171	34.118
51	Trinidad_20__13	14	8538c_TRA_Data	13/11/2018	11.641	58	488	0.588115	48	3335.42	0.0109	no	0.2006	0.0062	0.02653	0.00044	0.31794	37.6932	0.65	0.0551	0.0017	0.00759	0.00035	185.5	5.2	168.8	2.7	433	59	152.8	7	90.9973	38.9838	168.8	2.7	29.471	25.231	27.351
52	Trinidad_20__0	104	8551c_TRA_Data	13/11/2018	24.04	121	392	0.82398	90	1384.44	0.00416	no	0.195	0.047	0.02774	0.0009	0.33607	36.049	0.32	0.05062	0.011	0.00869	0.0036	180.8	40	176.4	5.6	226	36	175	73	97.5664	78.0531	176.4	5.6	46.203	38.801	42.502
53	Trinidad_20__14	25285	8560c_TRA_Data	13/11/2018	14.228	72	587	0.744463	49	3142.86	0.00212	no	0.1915	0.004	0.02792	0.00062	0.57019	35.8166	0.49	0.04985	0.00093	0.00871	0.00039	177.8	3.4	177.5	3.9	187	24	175.2	7.8	99.8313	94.9198	177.5	3.9	85.381	48.285	66.833
54	Trinidad_20__0	121	8553c_TRA_Data	13/11/2018	7.184	36	295	1.28475	61	1581.97	0.0036	no	0.1968	0.0069	0.02829	0.00066	0.57681	35.3482	0.73	0.0502	0.0016	0.00769	0.0018	182.3	5.8	179.8	4.2	219	43	154.8	37	98.6286	82.1005	179.8	4.2	49.636	33.373	41.5045
55	Trinidad_20__6	24	8540c_TRA_Data	13/11/2018	26.53	134	790	0.322532	65	5958.46	0.00409	no	0.2697	0.0032	0.03747	0.00089	0.67399	26.688	0.24	0.05255	0.00071	0.0118	0.00025	242.7	2.6	237.1	5.5	303	21	237	5	97.6926	78.2508	237.1	5.5	49.534	24.856	37.195
56	Trinidad_20__14	136	8554c_TRA_Data	13/11/2018	7.7749	40	323	0.575851	64	2218.75	0.0084	no	0.2795	0.009	0.03785	0.00075	0.4614	26.4201	0.41	0.0535	0.0018	0.00743	0.0018	250.1	7.1	239.5	4.7	347	34	150	37	95.7617	69.0202	239.5	4.7	67.195	37.253	52.224
57	Trinidad_20__14	88646	8566c_TRA_Data	13/11/2018	21.019	106	1122	0.263191	15	27666.7	0.00237	no	0.2748	0.0053	0.0383	0.0006	0.23883	26.1097	0.19	0.05193	0.00077	0.01267	0.00043	246.4	4.2	242.3	3.8	281	17	254.4	8.6	98.336	86.2278	242.3	3.8	84.602	35.285	59.9435
58	Trinidad_20__7	129	8553c_TRA_Data	13/11/2018	20.749	105	872	0.362385	17	21411.8	0.00093	no	0.2756	0.0059	0.0391	0.00055	0.44151	25.5755	0.22	0.0513	0.0013	0.01186	0.0028	247.1	4.7	247.2	3.4	253	32	238.3	56	100.04	97.7075	247.2	3.4	54.094	34.247	44.1705
59	Trinidad_20__4	90	8549c_TRA_Data	13/11/2018	16.655	84	883	0.578709	10	36700	0.0039	no	0.2805	0.0092	0.03937	0.00097	0.17097	25.4001	0.23	0.05197	0.00094	0.01042	0.00058	251	7.3	248.9	6	283	22	210	12	99.1633	87.9505	248.9	6	46	27	36.5
60	Trinidad_20__12	13	8538c_TRA_Data	13/11/2018	11.519	58	5120	0.582031	4800	653.333	0.0552	yes	0.318	0.013	0.045	0.0015	0.96292	22.62	0.8	0.05119	0.0007	-0.0001	0.00026	280	10	283.5	9.3	245	33	-2.1	5.2	101.25	115.714	283.5	9.3	26.211	24.969	25.59
61	Trinidad_20__9	61	8545c_TRA_Data	13/11/2018	13.856	70	3010	0.35515	1380	1756.52	0.0557	yes	0.4801	0.016	0.06314	0.0013	0.99985	15.84	0.18	0.05513	0.00013	0.00287	0.0006	398	11	394.7	7.7	417.2	5.1	58	12	99.1709	94.6069	394.7	7.7	56.845	41.795	49.32
62	Trinidad_20__10	96	8550c_TRA_Data	13/11/2018	19.243	95	113.9	0.492537	50	1578	0.0044	no	0.4751	0.017	0.06323	0.0017	0.43705	15.8153	0.21	0.055	0.0012	0.02018	0.00059	394.3	12	395.2	10	403	29	404	12	100.228	98.0645	395.2	10	56.86	40.799	48.8295
63	Trinidad_20__0	3888	8557c_TRA_Data	13/11/2018	19.858	100	705	0.598582	530	908.868	0.0231	yes	0.471	0.013	0.06426	0.0017	0.80362	15.61	0.23	0.05305	0.00085	0.0137	0.00086	391.3	9.1	401.4	10	321	38	275	17	102.581	125.047	401.4	10	73.408	41.679	57.5435
64	Trinidad_20__14	159	8556c_TRA_Data	13/11/2018	16.695	84	1076	0.999071	213	3413.15	0.0125	no	0.5667	0.024	0.0647	0.0026	0.82333	15.4559	0.33	0.06561	0.0011	0.01227	0.00052	455.6	16	404.3	16	790	28	246.4	10	88.7401	51.1772	404.3	16	56.437	37.45	46.9435
65	Trinidad_20__3	38	8543c_TRA_Data	13/11/2018	21.528	108	1484	0.411051	950	1555.79	0.0553	yes	0.625	0.037	0.0785	0.0039	0.99838	13.57	0.67	0.0578	0.00059	0.0002	0.0013	490	24	486	23	518	22	4	27	99.1837	93.8224	486	23	36.068	27.076	31.572
66	Trinidad_20__6	75	8547c_TRA_Data	13/11/2018	14.219	72	333	0.387387	14	21214.3	0.0028	no	0.6666	0.016	0.0833	0.0015	0.33699	12.0048	0.15	0.05805	0.00085	0.02728	0.00049	518.4	9.7	515.9	9	534	18	543.9	9.7	99.5177	96.6105	515.9	9	62.123	44.926	53.5245
67	Trinidad_20__9	95	8550c_TRA_Data	13/11/2018	24.35	122	1116	0.295699	867	1313.73	0.04796	yes	0.737	0.033	0.0898	0.0028	0.99962	11.29	0.24	0.0594	0.00065	-0.00363	0.00078	559	20	554	16	581	24	-74	16	99.1055	95.3528	554	16	78.569	35.765	57.167
68	Trinidad_20__12	81	8547c_TRA_Data	13/11/2018	25.268	127	1098	0.429872	1290	934.884	0.0711	yes	0.746	0.024	0.0902	0.002	0.99965	11.2	0.2	0.05985	0.00027	0.0021	0.00073	564.6	14	556.5	12	597.1	9.6	42	15	98.5654	93.2005	556.5	12	51.889	37.15	44.5195
69	Trinidad_20__0	35	8543c_TRA_Data	13/11/2018	16.49	83	2340	0.671795	7200	402.778	0.079	yes	0.785	0.031	0.0937	0.0038	0.9977	10.94	0.39	0.06053	0.00036	0.01215	0.00084	585	18	577	23	621	13	244	17	98.6325	92.9147	577	23	35.226	27.94	31.583
70	Trinidad_20__13	65	8545c_TRA_Data	13/11/2018	26.4	133	174	0.31954	17	12470.6	0.00115	no	0.8381	0.021	0.10018	0.0018	0.46304	9.98203	0.091	0.06068	0.00074	0.03173	0.0011	617.7	12	615.4	11	626	15	631	22	99.6277	98.3067	615.4	11	62.723	35.016	48.8695
71	Trinidad_20__14	15	8538c_TRA_Data	13/11/2018	12.829	65	164.8	0.478762	24	8833.33	0.00162	no	0.849	0.013	0.1024	0.0014	0.45672	9.76562	0.13	0.06045	0.001	0.03237	0.00063	623.9	7.4	628.3	8.1	631	18	644	12	100.705	99.5721	628.3	8.1	45.652	39.743	42.6975
72	Trinidad_20__4	125	8553c_TRA_Data	13/11/2018	8.3053	42	1980	0.4	1310	1694.66	0.0429	yes	0.869	0.026	0.1025	0.0017	0.99974	9.77	0.11	0.06147	0.00041	0.00806	0.0042	634.7	14	628.8	9.8	655.6	14	162	85	99.0704	95.9121	628.8	9.8	70.628	39.444	55.036
73	Trinidad_20__1	4653	8557c_TRA_Data	13/11/2018	20.282	102	203.2	0.457185	33	6590.91	0.00178	no	0.8733	0.023	0.1036	0.0025	0.36898	9.65251	0.097	0.06113	0.001	0.03263	0.00073	637.1	12	635.2	14	644	19	649	14	99.7018	98.6335	635.2	14	19.05	16.689	17.8695
74	Trinidad_20__11	46	8544c_TRA_Data	13/11/2018	11.27	57	2010	0.268657	1300	2238.46	0.0247	yes	1.062	0.039	0.1199	0.0028	0.99972	8.37	0.13	0.06418	0.0003	-0.0027	0.0021	734	19	730	16	747.2	9.8	-55	42	99.455	97.6981	730	16	36.394	26.729	31.5615
75	Trinidad_20__9	154	8556c_TRA_Data	13/11/2018	14.21	71	3570	1.21008	790	5588.61	0.0396	yes	1.103	0.07	0.1228	0.0049	0.99978	8.17	0.13	0.06506	0.00058	0.01487	0.00063	754	33	747	28	776	19	298	13	99.0716	96.2629	747	28	48.598	34.085	41.3415
76	Trinidad_20__14	49	8544c_TRA_Data	13/11/2018	8.8461	45	4000	0.2775	1830	3147.54	0.029	yes	1.119	0.048	0.124	0.0041	0.98428	8.14	0.24	0.06497	0.00059	-0.0042	0.003	760	23	753	23	772	19	-85	61	99.0789	97.5389	753	23	45.54	32.935	39.2375
77	Trinidad_20__10	155	8556c_TRA_Data	13/11/2018	26.082	131	2210	0.742081	457	6805.25	0.02964	yes	1.229	0.065	0.1334	0.005	0.99949	7.495	0.057	0.06677	0.00029	0.02085	0.00068	814.1	30	808	29	831	9.3	417	13	99.2507	97.2323	808	29	54.023	45.746	49.8845
78	Trinidad_20__6	128	8553c_TRA_Data	13/11/2018	15.424	78	956	0.204289	364	4093.41	0.0264	yes	1.293	0.067	0.1377	0.0047	0.99931	7.4	0.23	0.06759	0.0019	-0.0091	0.011	837	29	831	27	852	59	-187	230	99.2832	97.5352	831	27	46.599	38.553	42.576
79	Trinidad_20__8	94	8550c_TRA_Data	13/11/2018	19.492	99	1400	0.125714	233	8583.69	0.0367	yes	1.347	0.11	0.1383	0.0078	0.98514	7.72	0.41	0.0688	0.0024	-0.088	0.015	845	48	832	44	876	69	-1920	330	98.4615	94.9772	832	44	54	44	49
80	Trinidad_20__1	63119	8565c_TRA_Data	13/11/2018	20.738	105	75.9	0.44137	41	2668.29	0.00203	no	1.511	0.033	0.1554	0.003	0.50208	6.43501	0.089	0.07051	0.0012	0.0478	0.0017	933.9	13	931	17	942	19	944	32	99.6895	98.8323	931	17	59.101	50.165	54.633
81	Trinidad_20__5	7911	8557c_TRA_Data	13/11/2018	12.899	65	11.09	1.28314	35	502.286	0.008	no	1.631	0.08	0.1633	0.0077	0.6063	6.1237	0.26	0.073	0.003	0.0491	0.0019	976	31	974	42	1006	46	968	37	99.7951	96.8191	974	42	90.646	42.639	66.6425
82	Trinidad_20__10	10477	8558c_TRA_Data	13/11/2018	21.85	109	45.3	0.735982	13	5969.23	0.0015	no	1.675	0.05	0.1688	0.0044	0.56853	5.92417	0.087	0.0721	0.0014	0.04885	0.0011	999	20	1005	24	986	25	964	20	100.601	101.927	1005	24	71.626	48.978	60.302
83	Trinidad_20__8	130	8553c_TRA_Data	13/11/2018	22.487	114	1820	0.373077	382	8507.85	0.03025	yes	1.76	0.071	0.1716	0.0042	0.96724	5.91	0.13	0.07425	0.003	0.00998	0.011	1025	26	1020	23	1045	82	200	220	99.5122	97.6077	1020	23	45.181	40.918	43.0495
84	Trinidad_20__5	40	8543c_TRA_Data	13/11/2018	12.089	61	136	2.80147	400	787.5	0.0561	yes	1.91	0.16	0.1777	0.0089	0.99741	5.81	0.27	0.0768	0.0016	0.0092	0.0014	1069	54	1052	49	1107	41	185	27	98.4097	95.0316	1052	49	36.803	24.114	30.4585
85	Trinidad_20__12	11267	8558c_TRA_Data	13/11/2018	23.543	118	185.3	0.497032	16	21831.2	5e-05	no	1.912	0.049	0.1842	0.0043	0.63574	5.42888	0.048	0.07502	0.0011	0.0527	0.00094	1084.8	17	1089.8	24	1070.4	17	1038	18	100.461	101.812	1089.8	24	86.152	37.363	61.7575
86	Trinidad_20__7	152	8555c_TRA_Data	13/11/2018	11.02	56	284	0.299296	56	8571.43	-0.0006	no	1.849	0.081	0.181	0.0068	0.70905	5.52486	0.079	0.07677	0.0012	0.0472	0.0018	1062	29	1072	37	1113	20	931	35	100.942	96.3163	1113	20	53.775	32.675	43.225
87	Trinidad_20__5	68165	8565c_TRA_Data	13/11/2018	28.127	142	95.6	0.527197	4	47650	0.00051	no	2.165	0.045	0.199	0.0033	0.70276	5.02513	0.047	0.07873	0.0011	0.05948	0.0019	1169.9	14	1169.8	18	1161.9	16	1168	36	99.9915	100.68	1161.9	16	60.374	57.009	58.6915
88	Trinidad_20__16	85	8547c_TRA_Data	13/11/2018	19.172	96	103.9	0.811357	27	8474.07	0.0024	no	2.185	0.056	0.1987	0.0042	0.77602	5.03271	0.083	0.07957	0.00086	0.0612	0.0014	1175	18	1168	23	1189	11	1199	27	99.4043	98.2338	1189	11	71.54	35.026	53.283
89	Trinidad_20__6	58	8545c_TRA_Data	13/11/2018	9.1053	46	137	1.0365	32	11593.8	0.00062	no	2.283	0.072	0.2062	0.0054	0.87152	4.84966	0.096	0.08033	0.001	0.01698	0.00087	1206	22	1208	29	1205	14	340	17	100.166	100.249	1205	14	40.62	29.559	35.0895
90	Trinidad_20__4	73	8547c_TRA_Data	13/11/2018	8.7108	44	318.5	0.798744	20	34800	0.0051	no	2.241	0.056	0.2032	0.0049	0.46303	4.92126	0.09	0.0806	0.0015	0.0675	0.0026	1193	18	1192	26	1207	17	1332	55	99.9162	98.7572	1207	17	57.486	36.257	46.8715
91	Trinidad_20__4	17688	8559c_TRA_Data	13/11/2018	11.453	58	122.3	0.815209	18	13777.8	7e-05	no	2.375	0.051	0.2135	0.0047	0.79706	4.68384	0.071	0.08064	0.0013	0.0618	0.0027	1234	15	1247	25	1209	16	1211	51	101.053	103.143	1209	16	98.437	38.593	68.515
92	Trinidad_20__6	31680	8562c_TRA_Data	13/11/2018	25.319	127	122	0.864754	27	8925.93	0.0081	no	2.271	0.053	0.198	0.0032	0.55092	5.05051	0.049	0.08234	0.0019	0.06443	0.0015	1202.4	17	1164	17	1252	25	1262	28	96.8064	92.9712	1252	25	83.571	42.187	62.879
93	Trinidad_20__10	62	8545c_TRA_Data	13/11/2018	14.225	72	1920	0.168229	360	15500	-0.0004	no	2.826	0.076	0.2383	0.0058	0.38054	4.19639	0.078	0.0864	0.0017	0.0563	0.0052	1362	20	1377	30	1342	33	1103	100	101.101	102.608	1342	33	59.59	31.922	45.756
94	Trinidad_20__3	72	8547c_TRA_Data	13/11/2018	9.7629	48	878	0.082574	98	20204.1	0.0012	no	2.513	0.065	0.2053	0.0047	0.64408	4.87092	0.091	0.0893	0.0014	0.065	0.0054	1275	19	1203	25	1412	17	1270	100	94.3529	85.1983	1412	17	56.453	30.967	43.71
95	Trinidad_20__8	70852	8565c_TRA_Data	13/11/2018	25.969	131	385	1.19481	93	10322.6	0.0034	no	3.07	0.061	0.2474	0.0044	0.77433	4.04204	0.045	0.08974	0.0012	0.08	0.0025	1424.3	15	1425	23	1418.7	15	1556	47	100.049	100.444	1418.7	15	59.335	48.889	54.112
96	Trinidad_20__7	76	8547c_TRA_Data	13/11/2018	16.142	82	1339	0.488424	395	8151.9	0.0017	no	2.729	0.057	0.2189	0.0035	0.5339	4.5683	0.042	0.09028	0.00075	0.0631	0.0024	1336.2	16	1276	19	1431	9.2	1235	45	95.4947	89.1684	1431	9.2	45.387	35.851	40.619
97	Trinidad_20__8	35698	8562c_TRA_Data	13/11/2018	24.777	125	113.5	1.09075	96	2968.75	0.0052	no	3.105	0.089	0.2514	0.0045	0.65434	3.97772	0.048	0.0909	0.0023	0.0774	0.0026	1431	21	1445	23	1441	40	1506	48	100.978	100.278	1441	40	70.618	47.64	59.129
98	Trinidad_20__13	158	8556c_TRA_Data	13/11/2018	13.588	67	137.1	0.28957	14	24478.6	0.00077	no	3.154	0.14	0.2524	0.0098	0.82652	3.96197	0.073	0.0923	0.0014	0.0762	0.0022	1444	35	1450	51	1472	18	1483	41	100.416	98.5054	1472	18	50.252	32.431	41.3415
99	Trinidad_20__14	13250	8558c_TRA_Data	13/11/2018	20.464	102	219.2	0.304288	19	31105.3	0.00025	no	3.403	0.088	0.2667	0.0063	0.66693	3.74953	0.034	0.09236	0.0013	0.0755	0.0018	1504.3	20	1524	32	1472.4	15	1471	34	101.31	103.504	1472.4	15	76.938	50.403	63.6705
100	Trinidad_20__1	146	8555c_TRA_Data	13/11/2018	14.945	75	668	1.10928	260	5884.62	0.0143	no	2.917	0.12	0.2176	0.0079	0.79866	4.59559	0.052	0.0925	0.0011	0.0362	0.0034	1385.9	31	1269	42	1477.8	14	717	66	91.565	85.8709	1477.8	14	65.355	31.717	48.536
101	Trinidad_20__3	89	8549c_TRA_Data	13/11/2018	4.5722	23	7650	0.0278431	620	40161.3	0	no	3.377	0.11	0.262	0.0064	0.38752	3.81679	0.033	0.09314	0.0015	24.2	2.5	1498.8	25	1500	33	1491	18	64700	1900	100.08	100.604	1491	18	45.928	41.029	43.4785
102	Trinidad_20__13	31	8541c_TRA_Data	13/11/2018	13.499	65	358	0.53352	50	26380	0.00157	no	3.36	0.037	0.2586	0.0064	0.67123	3.86698	0.047	0.09368	0.0012	0.0816	0.002	1494.4	8.7	1483	33	1503.6	14	1586	38	99.2372	98.63	1503.6	14	41.085	36.104	38.5945
103	Trinidad_20__6	8048	8557c_TRA_Data	13/11/2018	16.732	83	231.9	0.582579	57	10333.3	0.00165	no	3.282	0.084	0.2531	0.0061	0.44569	3.95101	0.041	0.09384	0.0014	0.0757	0.0014	1476.5	20	1454	31	1506	18	1475	27	98.4761	96.5471	1506	18	68.217	53.271	60.744
104	Trinidad_20__11	41997	8562c_TRA_Data	13/11/2018	23.2	117	2250	0.143111	538	10966.5	0.00154	no	3.5	0.083	0.2681	0.0052	0.36769	3.72995	0.057	0.0971	0.0025	0.0939	0.0029	1526.2	19	1530	27	1564	41	1813	53	100.249	97.8261	1564	41	83.855	39.94	61.8975
105	Trinidad_20__10	45	8544c_TRA_Data	13/11/2018	3.2713	17	347	0.501153	20	45150	-0.0039	no	3.041	0.1	0.2286	0.0054	0.62077	4.37445	0.074	0.0969	0.0019	0.0593	0.0044	1417	25	1327	28	1565	23	1165	83	93.6486	84.7923	1565	23	46.14	31.072	38.606
106	Trinidad_20__8	77	8547c_TRA_Data	13/11/2018	12.892	65	2750	0.192	4090	1958.44	-0.00165	no	3.578	0.099	0.2658	0.0063	0.71439	3.76223	0.073	0.0975	0.0014	0.0587	0.0031	1543	22	1518	32	1575	22	1151	59	98.3798	96.381	1575	22	52.729	43.223	47.976
107	Trinidad_20__15	33	8541c_TRA_Data	13/11/2018	23.924	121	174.3	0.216294	53	11415.1	0.00041	no	3.553	0.031	0.2643	0.0063	0.61012	3.78358	0.037	0.09742	0.0012	0.0809	0.0024	1538.4	6.9	1512	32	1577	16	1571	45	98.2839	95.8782	1577	16	43.791	34.571	39.181
108	Trinidad_20__11	63	8545c_TRA_Data	13/11/2018	7.3127	37	508	0.537402	130	12538.5	0.0007	no	3.904	0.12	0.2841	0.007	0.34346	3.51989	0.068	0.0997	0.0024	0.0189	0.0031	1613	25	1612	35	1610	38	378	62	99.938	100.124	1610	38	67.547	24.015	45.781
109	Trinidad_20__0	52	8545c_TRA_Data	13/11/2018	16.615	84	555	0.353874	199	8366.83	0.0013	no	3.295	0.087	0.2388	0.005	0.82533	4.1876	0.057	0.10001	0.0011	0.0718	0.0029	1478.9	21	1380	26	1622.2	11	1401	54	93.3126	85.0697	1622.2	11	61.382	33.749	47.5655
110	Trinidad_20__11	29	8541c_TRA_Data	13/11/2018	13.365	68	296	0.444595	51	22862.7	0.00031	no	4.187	0.092	0.3025	0.0086	0.77432	3.30579	0.061	0.1008	0.0018	0.0897	0.0041	1672	19	1703	43	1637	24	1733	78	101.854	104.032	1637	24	46.196	26.349	36.2725
111	Trinidad_20__14	83	8547c_TRA_Data	13/11/2018	13.528	68	758	0.117018	242	9095.04	0.00065	no	3.803	0.09	0.2735	0.005	0.63905	3.65631	0.046	0.101	0.0011	0.0874	0.0025	1593	19	1558	25	1641	11	1693	46	97.8029	94.9421	1641	11	57.391	41.309	49.35
112	Trinidad_20__7	69438	8565c_TRA_Data	13/11/2018	16.407	82	80.4	1.28607	19	13131.6	0.0014	no	3.997	0.096	0.2861	0.0061	0.84419	3.49528	0.055	0.1011	0.0015	0.0821	0.0027	1634	20	1621	31	1645	18	1594	50	99.2044	98.541	1645	18	65.962	47.445	56.7035
113	Trinidad_20__15	53791	8564c_TRA_Data	13/11/2018	22.86	116	430	0.925581	38	32000	0.00043	no	4.047	0.086	0.2895	0.0059	0.63122	3.45423	0.025	0.1013	0.00093	0.0854	0.0016	1643.2	17	1639	29	1648.5	9.3	1656	30	99.7444	99.4237	1648.5	9.3	60.907	34.377	47.642
114	Trinidad_20__3	5604	8557c_TRA_Data	13/11/2018	22.113	111	41.5	0.836145	44	2813.64	0.0029	no	4.079	0.13	0.2935	0.0086	0.84166	3.40715	0.063	0.1013	0.0016	0.0844	0.0018	1652	27	1657	42	1650	15	1637	33	100.303	100.424	1650	15	63.52	51.392	57.456
115	Trinidad_20__3	148	8555c_TRA_Data	13/11/2018	12.073	60	830	0.0220241	51	49451	0.000459	no	3.718	0.16	0.2527	0.0092	0.75126	3.95726	0.041	0.1014	0.0013	0.0855	0.0025	1574	33	1452	47	1650.6	14	1658	47	92.249	87.968	1650.6	14	58.02	38.118	48.069
116	Trinidad_20__11	10666	8558c_TRA_Data	13/11/2018	13.407	67	1049	0.160153	41	80853.7	-1.5e-05	no	4.075	0.1	0.2906	0.0068	0.73257	3.44116	0.03	0.10149	0.0013	0.0808	0.0014	1648.9	21	1644	34	1651.3	17	1570	26	99.7028	99.5579	1651.3	17	66.172	46.273	56.2225
117	Trinidad_20__4	22	8540c_TRA_Data	13/11/2018	26.921	136	66.3	0.612368	32	8375	0.00072	no	4.19	0.051	0.2984	0.0073	0.66408	3.35121	0.038	0.10232	0.0014	0.0886	0.0017	1672	10	1682	36	1665.6	14	1715	32	100.598	100.985	1665.6	14	52.153	39.672	45.9125
118	Trinidad_20__6	69167	8565c_TRA_Data	13/11/2018	10.02	50	469	0.609808	30	45800	0	no	4.401	0.096	0.3109	0.0059	0.65869	3.21647	0.041	0.1027	0.0015	0.089	0.0031	1712	18	1745	29	1671	17	1722	57	101.928	104.428	1671	17	107.465	39.811	73.638
119	Trinidad_20__5	44138	8563c_TRA_Data	13/11/2018	15.563	78	83.9	0.949225	22	11068.2	0.00042	no	4.32	0.11	0.3047	0.0072	0.77332	3.28192	0.048	0.1028	0.0012	0.09	0.0019	1696	20	1714	36	1673.8	12	1742	35	101.061	102.402	1673.8	12	70.527	46.985	58.756
120	Trinidad_20__3	124	8553c_TRA_Data	13/11/2018	23.2	117	63.6	0.674528	6	33433.3	0.00197	no	4.216	0.097	0.2968	0.0051	0.69193	3.36927	0.046	0.1027	0.0026	0.0876	0.021	1675	19	1675	25	1674	29	1697	390	100	100.06	1674	29	54.943	42.964	48.9535
121	Trinidad_20__8	60	8545c_TRA_Data	13/11/2018	13.811	70	295.6	0.329499	5	197800	0.00292	no	3.979	0.1	0.2808	0.0053	0.52432	3.56125	0.038	0.1026	0.0012	0.0894	0.0031	1629.4	21	1595	27	1675	13	1730	57	97.8888	95.2239	1675	13	44.747	31.413	38.08
122	Trinidad_20__9	73351	8565c_TRA_Data	13/11/2018	26.351	133	224.9	0.570031	9	77222.2	0.0002	no	4.315	0.093	0.3028	0.0057	0.7751	3.30251	0.044	0.10284	0.0014	0.0847	0.0043	1694	18	1704	28	1676.4	14	1648	79	100.59	101.646	1676.4	14	71.552	36.002	53.777
123	Trinidad_20__2	71	8547c_TRA_Data	13/11/2018	22.662	114	97.5	0.44	10	35900	0.00145	no	4.215	0.097	0.2958	0.005	0.71368	3.38066	0.034	0.10309	0.00088	0.0837	0.0035	1677	19	1670	25	1682	10	1622	66	99.5826	99.2866	1682	10	53.91	26.83	40.37
124	Trinidad_20__1	53	8545c_TRA_Data	13/11/2018	18.299	92	237.4	0.929655	56	13589.3	0.0113	no	3.715	0.098	0.2613	0.0053	0.7717	3.82702	0.049	0.10323	0.0011	0.0407	0.0022	1573	21	1496	27	1682.6	10	807	42	95.1049	88.91	1682.6	10	48.057	26.786	37.4215
125	Trinidad_20__16	161	8556c_TRA_Data	13/11/2018	16.577	83	186.4	0.686695	11	51454.5	0.00147	no	4.186	0.19	0.3081	0.013	0.91066	3.2457	0.073	0.10338	0.0014	0.0685	0.0059	1668	38	1729	62	1683	16	1330	110	103.657	102.733	1683	16	41.672	32.356	37.014
126	Trinidad_20__12	64	8545c_TRA_Data	13/11/2018	12.242	62	228	0.440789	1	834000	0.00074	no	4.23	0.11	0.296	0.0057	0.44837	3.37838	0.035	0.1034	0.0013	0.086	0.0032	1679.4	20	1671	28	1684	15	1668	59	99.4998	99.228	1684	15	43.025	29.031	36.028
127	Trinidad_20__13	100	8550c_TRA_Data	13/11/2018	13.688	66	223	0.813004	82	7573.17	0.003	no	3.735	0.14	0.2634	0.0078	0.78424	3.79651	0.073	0.1033	0.0018	0.0696	0.0044	1577	30	1506	40	1684	21	1358	83	95.4978	89.4299	1684	21	52.74	43.89	48.315
128	Trinidad_20__0	59493	8565c_TRA_Data	13/11/2018	24.992	123	398.3	0.0941501	81	14938.3	0.000103	no	4.32	0.081	0.3033	0.0049	0.63591	3.29707	0.027	0.1032	0.0013	0.0938	0.003	1696.5	16	1707	24	1685.5	12	1812	55	100.619	101.276	1685.5	12	58.844	56.879	57.8615
129	Trinidad_20__12	22477	8560c_TRA_Data	13/11/2018	4.7791	24	568	0.323944	50	30840	0.00042	no	4.313	0.091	0.303	0.0081	0.67303	3.30033	0.067	0.1036	0.002	0.0898	0.0045	1695	17	1706	40	1686	24	1738	83	100.649	101.186	1686	24	73.695	39.677	56.686
130	Trinidad_20__1	19	8540c_TRA_Data	13/11/2018	26.568	131	933	0.132905	112	34821.4	-0.00158	no	4.222	0.057	0.2966	0.0073	0.84264	3.37154	0.04	0.10345	0.0013	0.0643	0.0056	1676	11	1673	36	1686.5	16	1250	110	99.821	99.1995	1686.5	16	44.623	28.847	36.735
131	Trinidad_20__11	156	8556c_TRA_Data	13/11/2018	24.258	122	356	0.589888	49	22673.5	-0.0033	no	4.181	0.17	0.2937	0.01	0.66931	3.40483	0.027	0.10381	0.0012	0.0739	0.0019	1669.6	33	1660	52	1690.3	13	1441	36	99.425	98.2074	1690.3	13	54.529	37.219	45.874
132	Trinidad_20__2	26999	8561c_TRA_Data	13/11/2018	25.495	128	350	0.313143	37	28054.1	0.00025	no	4.348	0.1	0.3003	0.0051	0.72143	3.33	0.037	0.10351	0.0022	0.0862	0.002	1701.5	19	1692	25	1690.6	26	1670	38	99.4417	100.083	1690.6	26	96.489	45.618	71.0535
133	Trinidad_20__3	17545	8559c_TRA_Data	13/11/2018	13.27	66	297	0.30101	33	25393.9	0.00094	no	4.207	0.068	0.2951	0.0062	0.58074	3.38868	0.042	0.104	0.0016	0.0923	0.0039	1675	13	1666	31	1691	19	1784	72	99.4627	98.5216	1691	19	99.827	36.212	68.0195
134	Trinidad_20__13	23344	8560c_TRA_Data	13/11/2018	25.144	126	174.2	0.607348	11	48727.3	0	no	4.425	0.057	0.3097	0.0058	0.64851	3.22893	0.026	0.10373	0.0013	0.08615	0.0034	1716.4	11	1739	29	1691	14	1670	63	101.317	102.839	1691	14	72.706	56.048	64.377
135	Trinidad_20__3	30198	8561c_TRA_Data	13/11/2018	13.817	69	102.1	0.680705	3	96333.3	0.0037	no	4.307	0.11	0.2986	0.0071	0.8042	3.34896	0.067	0.1038	0.0025	0.0841	0.0043	1693	22	1683	35	1691	21	1629	81	99.4093	99.5269	1691	21	65.338	44.776	55.057
136	Trinidad_20__14	52141	8564c_TRA_Data	13/11/2018	12.461	63	501	0.742515	45	28888.9	0.0045	no	3.98	0.093	0.2786	0.0063	0.80277	3.58937	0.044	0.10375	0.001	0.0424	0.0067	1629.5	19	1584	32	1691.8	10	830	130	97.2077	93.6281	1691.8	10	105.015	28.95	66.9825
137	Trinidad_20__9	27	8541c_TRA_Data	13/11/2018	9.3643	48	233	0.291416	77	10922.1	-0.0083	no	3.868	0.058	0.2707	0.0069	0.80942	3.69413	0.049	0.1038	0.0014	0.0579	0.0017	1606	12	1544	35	1692	17	1136	33	96.1395	91.253	1692	17	44.432	26.421	35.4265
138	Trinidad_20__11	80	8547c_TRA_Data	13/11/2018	14.13	71	583	0.303259	46	40500	0.0006	no	4.212	0.1	0.2946	0.0057	0.64703	3.39443	0.047	0.1038	0.0012	0.0912	0.0033	1675	19	1664	28	1694	12	1762	61	99.3433	98.229	1694	12	49.277	33.848	41.5625
139	Trinidad_20__5	17925	8559c_TRA_Data	13/11/2018	13.933	70	93.7	0.747065	56	4664.29	-0.00026	no	4.258	0.076	0.2978	0.0067	0.64024	3.35796	0.047	0.1038	0.0017	0.0831	0.0035	1684	15	1680	33	1696	18	1612	66	99.7625	99.0566	1696	18	65.772	47.981	56.8765
140	Trinidad_20__15	50	8544c_TRA_Data	13/11/2018	25.361	128	281	0.633808	32	28593.8	0.01	no	3.749	0.083	0.2611	0.0055	0.82278	3.82995	0.048	0.10428	0.00081	0.0441	0.003	1580	18	1495	28	1700.5	8.5	870	58	94.6203	87.9153	1700.5	8.5	50.084	37.498	43.791
141	Trinidad_20__11	97	8550c_TRA_Data	13/11/2018	20.416	101	350	0.169429	30	39233.3	0.00015	no	4.346	0.14	0.3049	0.0077	0.45583	3.27976	0.035	0.1043	0.0017	0.0879	0.0018	1701.7	26	1715	38	1701	17	1702	33	100.782	100.823	1701	17	56.309	38.983	47.646
142	Trinidad_20__6	41	8543c_TRA_Data	13/11/2018	12.426	62	305.8	0.373447	23	53652.2	0.00018	no	4.306	0.086	0.2999	0.0056	0.54689	3.33445	0.028	0.10431	0.00089	0.086	0.0028	1694.1	16	1690	28	1702.5	7	1668	51	99.758	99.2658	1702.5	7	46.552	37.881	42.2165
143	Trinidad_20__0	42104	8563c_TRA_Data	13/11/2018	26.523	133	337	1.40059	24	42666.7	0.00095	no	4.372	0.092	0.3038	0.0062	0.44977	3.29164	0.022	0.1045	0.00094	0.0897	0.0014	1706.6	17	1710	30	1705.7	11	1736	25	100.199	100.252	1705.7	11	56.82	50.341	53.5805
144	Trinidad_20__13	11862	8558c_TRA_Data	13/11/2018	17.14	87	1176	0.123299	192	17760.4	0.00021	no	3.949	0.12	0.2734	0.008	0.95552	3.65764	0.075	0.10458	0.0014	0.0809	0.0023	1621	25	1557	41	1706.9	15	1572	42	96.0518	91.218	1706.9	15	87.987	47.793	67.89
145	Trinidad_20__10	48963	8564c_TRA_Data	13/11/2018	15.719	79	596	0.439597	7	252429	-3.7e-05	no	4.488	0.1	0.3106	0.0068	0.67641	3.21957	0.034	0.10446	0.0011	0.0925	0.0031	1728	19	1743	33	1707.6	12	1787	58	100.868	102.073	1707.6	12	90.67	39.917	65.2935
146	Trinidad_20__4	65457	8565c_TRA_Data	13/11/2018	27.567	139	318	0.358176	23	40087	-7e-05	no	4.36	0.086	0.3025	0.0054	0.84054	3.30579	0.037	0.10479	0.0013	0.0872	0.0027	1703.5	16	1703	27	1708	14	1689	50	99.9706	99.7073	1708	14	64.746	41.671	53.2085
147	Trinidad_20__0	13684	8559c_TRA_Data	13/11/2018	7.7173	39	52.4	0.778626	38	4323.68	0.0017	no	4.34	0.12	0.298	0.0085	0.79542	3.3557	0.083	0.1048	0.0021	0.0842	0.006	1699	22	1681	42	1709	22	1633	110	98.9406	98.3616	1709	22	67.534	48.008	57.771
148	Trinidad_20__12	76803	8566c_TRA_Data	13/11/2018	27.307	138	166.7	0.466107	18	27777.8	2.4e-05	no	4.502	0.083	0.31	0.005	0.73356	3.22581	0.025	0.10481	0.0012	0.08195	0.0024	1731.5	16	1740	24	1711.7	11	1592	45	100.491	101.653	1711.7	11	67.316	45.406	56.361
149	Trinidad_20__16	68	8545c_TRA_Data	13/11/2018	9.0778	45	304.4	0.446781	26	43423.1	0.0012	no	4.243	0.11	0.2915	0.0054	0.60353	3.43053	0.036	0.1052	0.0012	0.0897	0.0037	1682	21	1649	27	1719	13	1735	69	98.038	95.9279	1719	13	74.569	40.876	57.7225
150	Trinidad_20__11	76535	8566c_TRA_Data	13/11/2018	14.179	72	151.5	1.17822	9	46555.6	0.0019	no	4.465	0.11	0.3057	0.0074	0.83836	3.27118	0.067	0.1054	0.0016	0.0811	0.0037	1723	20	1719	37	1720	17	1576	70	99.7678	99.9419	1720	17	100.136	35.282	67.709
151	Trinidad_20__16	25415	8560c_TRA_Data	13/11/2018	9.3363	47	239	0.569456	52	12942.3	0.0018	no	4.444	0.077	0.306	0.0067	0.70023	3.26797	0.046	0.1056	0.0017	0.0936	0.0043	1720	14	1721	33	1722	21	1809	80	100.058	99.9419	1722	21	56.858	47.617	52.2375
152	Trinidad_20__11	12	8538c_TRA_Data	13/11/2018	9.0757	45	670	0.801493	270	8148.15	0.0087	no	3.969	0.055	0.2732	0.0052	0.49576	3.66032	0.068	0.1056	0.0019	0.0859	0.0023	1627	11	1557	26	1724	17	1665	43	95.6976	90.3132	1724	17	47.664	33.204	40.434
153	Trinidad_20__12	50963	8564c_TRA_Data	13/11/2018	26.057	132	235	0.435745	7	103429	0.00012	no	4.58	0.099	0.3141	0.0066	0.65986	3.1837	0.029	0.10576	0.001	0.0902	0.0013	1745	18	1760	33	1727	9.7	1745	25	100.86	101.911	1727	9.7	66.755	45.702	56.2285
154	Trinidad_20__5	91	8549c_TRA_Data	13/11/2018	15.251	77	558	0.478495	19	94421.1	0.00169	no	4.463	0.15	0.3046	0.0078	0.50397	3.28299	0.037	0.106	0.0018	0.0927	0.0019	1723.4	27	1714	38	1732	17	1792	36	99.4546	98.9607	1732	17	73.27	35.849	54.5595
155	Trinidad_20__8	153	8555c_TRA_Data	13/11/2018	22.189	111	277	0.975451	52	16346.2	0.0032	no	4.276	0.18	0.3008	0.012	0.89082	3.32447	0.055	0.10608	0.0014	0.0646	0.0048	1687	36	1694	58	1732.1	15	1259	92	100.415	97.8004	1732.1	15	63.298	43.328	53.313
156	Trinidad_20__5	74	8547c_TRA_Data	13/11/2018	22.477	113	494	0.168421	141	12198.6	0.00052	no	4.573	0.11	0.3112	0.0057	0.84364	3.21337	0.041	0.10615	0.00077	0.0948	0.0012	1742	20	1746	28	1734.3	7.8	1830	22	100.23	100.675	1734.3	7.8	64.371	31.39	47.8805
157	Trinidad_20__4	43331	8563c_TRA_Data	13/11/2018	15.541	79	342.6	0.570053	4	257000	0.00027	no	4.582	0.11	0.3132	0.0071	0.59061	3.19285	0.04	0.1063	0.0013	0.0929	0.0016	1746.8	18	1756	35	1737	14	1795	30	100.527	101.094	1737	14	64.945	49.561	57.253
158	Trinidad_20__4	5	8537c_TRA_Data	13/11/2018	5.5602	28	585	0.147179	125	16720	2e-05	no	4.418	0.056	0.3022	0.0058	0.70734	3.30907	0.064	0.1067	0.0015	0.0876	0.0025	1715	11	1702	29	1741	16	1696	46	99.242	97.7599	1741	16	50.119	39.986	45.0525
159	Trinidad_20__7	44946	8564c_TRA_Data	13/11/2018	18.239	92	581	0.636833	4	434000	0.00012	no	4.601	0.1	0.3126	0.0065	0.5843	3.19898	0.026	0.10666	0.0011	0.0924	0.0016	1748.9	18	1753	32	1743.4	11	1790	31	100.234	100.551	1743.4	11	59.305	55.195	57.25
160	Trinidad_20__12	134	8554c_TRA_Data	13/11/2018	8.2095	42	601	1.24626	56	32142.9	0.0006	no	4.53	0.1	0.3068	0.0058	0.61035	3.25945	0.05	0.1066	0.0028	0.0887	0.021	1736	18	1725	29	1744	24	1717	390	99.3664	98.9106	1744	24	51	35	43
161	Trinidad_20__13	51012	8564c_TRA_Data	13/11/2018	16.517	84	937	0.24333	42	67000	-0.00015	no	4.656	0.12	0.3168	0.0076	0.86526	3.15657	0.049	0.10669	0.0011	0.0856	0.002	1758	22	1773	38	1744.3	10	1659	38	100.853	101.645	1744.3	10	109.364	35.695	72.5295
162	Trinidad_20__7	8096	8557c_TRA_Data	13/11/2018	23.824	120	390	0.574872	28	44964.3	0.00011	no	4.625	0.12	0.3139	0.0076	0.68088	3.18573	0.034	0.10675	0.0015	0.0874	0.0018	1752.8	22	1759	37	1745.2	16	1693	34	100.354	100.791	1745.2	16	85.819	36.193	61.006
163	Trinidad_20__10	132	8554c_TRA_Data	13/11/2018	16.722	82	770	0.464935	512	4240.23	0.00094	no	4.096	0.085	0.2783	0.0042	0.64873	3.59325	0.039	0.10685	0.0026	0.08122	0.019	1652.8	17	1582	21	1745.9	24	1578	360	95.7164	90.6123	1745.9	24	43.004	31.68	37.342
164	Trinidad_20__5	150	8555c_TRA_Data	13/11/2018	3.5637	18	766	0.552219	220	9363.64	-0.0057	no	4.285	0.19	0.3012	0.012	0.03	3.32005	0.06	0.1067	0.0029	0.0677	0.002	1690	36	1697	59	1746	31	1324	38	100.414	97.1936	1746	31	59.125	43.392	51.2585
165	Trinidad_20__2	63321	8565c_TRA_Data	13/11/2018	22.828	115	980	0.121837	9	326667	4.6e-05	no	4.618	0.085	0.3134	0.005	0.49989	3.19081	0.023	0.10711	0.0014	0.094	0.0029	1752.2	15	1757	24	1750.4	13	1816	54	100.274	100.377	1750.4	13	58.444	52.786	55.615
166	Trinidad_20__16	59335	8564c_TRA_Data	13/11/2018	15.747	80	544	0.263603	71	23690.1	0.000108	no	4.715	0.1	0.319	0.0067	0.78503	3.1348	0.029	0.10703	0.0009	0.084	0.0014	1769.5	18	1784	33	1752.2	10	1630	26	100.819	101.815	1752.2	10	72.47	42.015	57.2425
167	Trinidad_20__7	59	8545c_TRA_Data	13/11/2018	13.496	68	533	0.315385	119	16126.1	-0.00115	no	4.512	0.11	0.3041	0.0058	0.51893	3.28839	0.036	0.1075	0.0013	0.072	0.0025	1732.9	20	1711	29	1758	13	1404	47	98.7362	97.3265	1758	13	46.077	36.945	41.511
168	Trinidad_20__11	133	8554c_TRA_Data	13/11/2018	23.108	116	159	0.685535	75	7026.67	-0.0027	no	4.616	0.1	0.3093	0.0048	0.78066	3.23311	0.035	0.10789	0.0026	0.0683	0.016	1750.9	18	1737	24	1765.6	27	1335	310	99.2061	98.3802	1765.6	27	54	30	42
169	Trinidad_20__4	30630	8561c_TRA_Data	13/11/2018	22.318	112	815	0.182822	19	137737	2e-07	no	4.908	0.11	0.3255	0.0047	0.67764	3.0722	0.021	0.10836	0.0023	0.0892	0.002	1803.2	19	1818	22	1772.4	24	1727	38	100.821	102.573	1772.4	24	90.479	36.352	63.4155
170	Trinidad_20__15	84	8547c_TRA_Data	13/11/2018	11.892	59	831	0.168472	67	41791	0.00033	no	4.482	0.1	0.2975	0.005	0.60455	3.36135	0.033	0.1091	0.0012	0.0868	0.0022	1727	19	1679	25	1784	13	1682	40	97.2206	94.1143	1784	13	56.822	45.218	51.02
171	Trinidad_20__2	123	8553c_TRA_Data	13/11/2018	12.896	65	501	0.427146	123	11707.3	0.0041	no	4.239	0.11	0.2816	0.0061	0.89334	3.55114	0.068	0.1088	0.0026	0.0263	0.0079	1680	22	1599	31	1785.5	28	522	160	95.1786	89.5547	1785.5	28	45.845	31.939	38.892
172	Trinidad_20__9	9585	8558c_TRA_Data	13/11/2018	23.312	117	198	1.18182	311	1819.94	0.0115	no	4.096	0.1	0.2705	0.0063	0.60165	3.69686	0.032	0.10966	0.0016	0.0843	0.0015	1652.8	21	1543	32	1794	18	1636	27	93.3567	86.0089	1794	18	56.939	49.546	53.2425
173	Trinidad_20__2	147	8555c_TRA_Data	13/11/2018	9.0807	45	395	0.635443	25	50200	0.0053	no	4.968	0.21	0.3087	0.012	0.64435	3.23939	0.051	0.1103	0.0018	0.0977	0.0025	1813	36	1734	58	1802	17	1885	46	95.6426	96.2264	1802	17	62.022	48.427	55.2245
174	Trinidad_20__0	18	8540c_TRA_Data	13/11/2018	6.596	34	592	0.106419	130	17461.5	-0.0059	no	4.54	0.11	0.2996	0.0094	0.75686	3.33778	0.076	0.1105	0.0021	0.0463	0.0075	1737	21	1689	47	1803	21	910	140	97.2366	93.6772	1803	21	48.265	24.586	36.4255
175	Trinidad_20__4	149	8555c_TRA_Data	13/11/2018	14.93	72	686	0.679009	6	381667	0.0102	no	5.109	0.21	0.3069	0.011	0.54948	3.25839	0.036	0.1124	0.0016	0.1025	0.002	1837	35	1725	55	1844	15	1971	37	93.9031	93.5466	1844	15	59.125	43.392	51.2585
176	Trinidad_20__2	37	8543c_TRA_Data	13/11/2018	10.855	54	505	0.423762	103	20951.5	0.0021	no	5.013	0.12	0.3229	0.0064	0.35045	3.09693	0.035	0.1131	0.0017	0.1011	0.0033	1820	20	1803	31	1848	23	1947	61	99.0659	97.5649	1848	23	60.502	36.596	48.549
177	Trinidad_20__12	30	8541c_TRA_Data	13/11/2018	22.542	114	283.9	0.352237	19	62736.8	0.00321	no	5.173	0.037	0.3258	0.0076	0.47095	3.06937	0.025	0.11524	0.0014	0.1039	0.0017	1847.7	6.1	1817	37	1884.3	12	1997	31	98.3385	96.4284	1884.3	12	41.785	30.898	36.3415
178	Trinidad_20__5	57	8545c_TRA_Data	13/11/2018	13.041	66	1318	0.273141	70	82285.7	0.00195	no	6.19	0.2	0.359	0.012	0.80476	2.78552	0.079	0.1251	0.0021	0.1147	0.0053	2000	29	1976	55	2030	20	2193	96	98.8	97.3399	2030	20	40.986	35.632	38.309
179	Trinidad_20__10	20507	8559c_TRA_Data	13/11/2018	20.433	103	350	0.791429	71	19014.1	0.00071	no	7.67	0.26	0.4074	0.0096	0.63116	2.45459	0.041	0.1365	0.0037	0.1189	0.0053	2183	30	2201	44	2167	48	2270	95	100.825	101.569	2167	48	79.255	36.672	57.9635
180	Trinidad_20__13	48	8544c_TRA_Data	13/11/2018	13.378	68	338	0.293195	41	42097.6	0.00278	no	7.36	0.23	0.3819	0.0084	0.8698	2.61849	0.039	0.1393	0.0022	0.1196	0.0039	2151	29	2084	39	2215	26	2283	71	96.8852	94.0858	2215	26	44.324	29.186	36.755
181	Trinidad_20__7	33061	8562c_TRA_Data	13/11/2018	16.629	84	821	0.478685	53	63584.9	0.00033	no	8.55	0.19	0.4239	0.0063	0.43491	2.35905	0.019	0.1469	0.0032	0.1208	0.0029	2291	20	2278	28	2309.5	23	2305	52	99.4326	98.6361	2309.5	23	67.288	48.3	57.794
182	Trinidad_20__15	16	8538c_TRA_Data	13/11/2018	15.731	79	145.4	1.01376	22	41090.9	-0.00029	no	10.11	0.14	0.4601	0.0057	0.70399	2.17344	0.027	0.1612	0.0016	0.1191	0.0011	2444	13	2439	25	2465	15	2275	21	99.7954	98.9452	2465	15	43.281	31.889	37.585
	Discordant Analyses (More than +5 to -10% '68/75' discordance for <1100Ma '6/8' age; +5 to -15% '68/76' discordance for ≥1100Ma '7/6' age)
183	Trinidad_20__5	6	8537c_TRA_Data	13/11/2018	11.962	60	613	0.724307	329	3933.13	0.0245	no	2.212	0.044	0.1721	0.0035	0.81481	5.81058	0.12	0.0932	0.0012	0.03482	0.00073	1183	14	1023	19	1492	13	692	14	86.4751	68.5657	1492	13	55.672	22.893	39.2825
184	Trinidad_20__2	3	8537c_TRA_Data	13/11/2018	13.018	66	427	1.25527	300	3363.33	0.0239	no	2.215	0.032	0.1729	0.0026	0.90727	5.78369	0.091	0.09337	0.00075	0.0166	0.0011	1185	10	1028	14	1494.8	11	332	22	86.7511	68.7717	1494.8	11	52.249	40.942	46.5955
185	Trinidad_20__7	18732	8559c_TRA_Data	13/11/2018	16.397	83	187	0.604278	17	24235.3	0.0024	no	2.944	0.045	0.223	0.0044	0.74582	4.4843	0.046	0.09584	0.0013	0.06703	0.0027	1392.6	11	1297	23	1544.9	16	1311	51	93.1351	83.9537	1544.9	16	55	51	53
186	Trinidad_20__1	122	8553c_TRA_Data	13/11/2018	24.821	126	852	0.267254	258	8178.29	0.0056	no	3.173	0.071	0.2261	0.0034	0.71576	4.42282	0.045	0.10164	0.0024	0.0692	0.017	1450.7	18	1313	18	1653.7	32	1352	310	90.508	79.3977	1653.7	32	42	38	40
187	Trinidad_20__16	103	8550c_TRA_Data	13/11/2018	28.437	143	666	0.606607	204	8514.71	0.0063	no	3.36	0.12	0.2382	0.0067	0.93617	4.19815	0.073	0.10186	0.0014	0.0484	0.0025	1494	28	1379	34	1662.1	15	953	49	92.3025	82.9673	1662.1	15	43.992	38.552	41.272
188	Trinidad_20__12	47	8544c_TRA_Data	13/11/2018	11.097	56	503	0.33002	1230	1029.27	0.0149	no	3.043	0.091	0.214	0.0048	0.75473	4.6729	0.071	0.1032	0.0016	0.0511	0.0033	1416	23	1250	25	1679	26	1006	64	88.2768	74.4491	1679	26	46.904	31.028	38.966
189	Trinidad_20__1	70	8547c_TRA_Data	13/11/2018	17.018	86	205	1.27805	140	3907.14	0.0158	no	3.48	0.13	0.2458	0.0091	0.92403	4.06835	0.15	0.1033	0.0013	0.0701	0.0052	1517	29	1414	47	1679	17	1364	98	93.2103	84.2168	1679	17	48.359	41.626	44.9925
190	Trinidad_20__0	69	8547c_TRA_Data	13/11/2018	5.7802	29	1567	0.0358009	138	30144.9	-0.00105	no	3.446	0.11	0.2414	0.0054	0.66816	4.1425	0.076	0.1041	0.0019	0.0608	0.0053	1514	24	1394	28	1700	22	1190	100	92.074	82	1700	22	63	35	49
191	Trinidad_20__5	23	8540c_TRA_Data	13/11/2018	14.861	75	1344	0.213244	421	8375.3	0.0198	no	3.066	0.056	0.2139	0.0066	0.76547	4.67508	0.11	0.105	0.0017	0.0382	0.0017	1423	14	1248	35	1706	23	758	33	87.702	73.1536	1706	23	34.572	31.231	32.9015
192	Trinidad_20__9	10	8537c_TRA_Data	13/11/2018	15.126	76	1800	0.313333	890	5719.1	0.013	no	3.343	0.073	0.2293	0.0052	0.73161	4.3611	0.1	0.1054	0.0017	0.0591	0.0011	1489	17	1330	27	1721	26	1161	21	89.3217	77.2807	1721	26	45.759	35.504	40.6315
193	Trinidad_20__9	131	8553c_TRA_Data	13/11/2018	14.5	73	71.5	1.04895	42	3707.14	0.0282	no	3.109	0.081	0.212	0.0042	0.65049	4.71698	0.082	0.1063	0.0029	0.0559	0.013	1433	20	1243	24	1735	38	1099	250	86.7411	71.6427	1735	38	50.506	37.688	44.097
194	Trinidad_20__3	4	8537c_TRA_Data	13/11/2018	16.539	84	493	0.914807	240	5650	0.0303	no	3.073	0.047	0.2103	0.0032	0.83317	4.75511	0.074	0.10666	0.00095	0.0328	0.0015	1425	12	1230	17	1739.9	11	652	29	86.3158	70.6937	1739.9	11	45.794	29.444	37.619
195	Trinidad_20__14	101	8550c_TRA_Data	13/11/2018	25.247	128	407	0.556757	320	3021.88	0.0236	no	3.253	0.11	0.219	0.0059	0.7606	4.56621	0.061	0.10776	0.0017	0.0396	0.0038	1470	26	1276	31	1760	21	781	73	86.8027	72.5	1760	21	54.554	39.046	46.8
196	Trinidad_20__7	25	8540c_TRA_Data	13/11/2018	8.6009	42	697	0.731707	320	6625	0.008	no	3.768	0.079	0.2519	0.0074	0.62367	3.96983	0.079	0.109	0.0022	0.0673	0.0034	1585	17	1448	38	1779	23	1316	64	91.3565	81.394	1779	23	42.44	28.861	35.6505
197	Trinidad_20__0	86	8549c_TRA_Data	13/11/2018	24.213	122	627	0.69378	223	7860.99	0.0064	no	3.611	0.13	0.2462	0.0071	0.94281	4.06174	0.074	0.10697	0.0015	0.0677	0.0023	1549	28	1418	37	1747.7	14	1323	44	91.5429	81.1352	1747.7	14	42.362	32.07	37.216
198	Trinidad_20__1	2	8537c_TRA_Data	13/11/2018	24.443	123	157	1.05414	283	1908.13	0.0191	no	4.01	0.11	0.262	0.0063	0.78258	3.81679	0.095	0.1113	0.0017	0.0604	0.0053	1631	22	1498	32	1818	26	1180	100	91.8455	82.3982	1818	26	44.41	25.427	34.9185
199	Trinidad_20__12	157	8556c_TRA_Data	13/11/2018	11.962	60	398	0.947236	412	2240.29	0.0336	no	3.391	0.14	0.2213	0.0081	0.40605	4.51875	0.051	0.1123	0.0019	0.0335	0.0015	1501.6	33	1288	43	1835	23	666	29	85.7752	70.1907	1835	23	50.684	31.678	41.181
200	Trinidad_20__5	127	8553c_TRA_Data	13/11/2018	10.358	52	474	0.289241	250	5360	0.0041	no	5.04	0.12	0.2837	0.005	0.70682	3.52485	0.049	0.1288	0.0032	0.0638	0.015	1825	20	1609	25	2083	29	1249	290	88.1644	77.2444	2083	29	44.374	35.379	39.8765
201	Trinidad_20__10	28	8541c_TRA_Data	13/11/2018	19.721	98	153.2	0.278721	85	6835.29	0.0094	no	5.393	0.093	0.2963	0.0082	0.85766	3.37496	0.057	0.1325	0.0019	0.0871	0.0027	1881	15	1672	41	2130	15	1687	50	88.8889	78.4977	2130	15	29	26.6	27.8
	Notes
	1 Calibration standard: 91500m zircon (U=80 ppm, Th=30 ppm) (Wiedenbeck et al., 2004)
	2 Common Pb correction made using the method of Andersen (2002), as calculated by Iolite v.3.6
	3 Data corrected for background, drift and downhole U/Pb fractionation using Iolite v.3.6 and 91500 zircon as calibration standard
	4 Uncertainties Uncertainties quoted are Iolite output of 2SE for isotopic ratios, either as internal error only and expressed as 2sint for age or propagated random errors (Internal error + Calculated excess uncertainity) and expressed as 2sprop for age (Paton et al., 2010)
	5 Dates calculated using the decay constants of Jaffey et al. (1971)
	6 Concordence calculated as (206Pb-238U age/207Pb-235U age)*100
	7 Concordance calculated as (206Pb-238U age/207Pb-206Pb age)*100
	8 If zircon age <1100Ma, preferred age is 206Pb-238U age with concordance as 90%-105%; if zircon age ≥1100Ma, Preferred age is 207Pb-206Pb age with concordance as 85%-105%.

## Sheet: Pierre Sh 20-63um 
	Table S4. U-Pb Isotope Data for Detrital Zircon, Pierre Shale Mount (Coarse Silt), Raton Basin																																	Sylvester, Souders, Liu Geology G49684
	Mineral Isotope Laser Laboratory (MILL), Texas Tech University, 20 µm spots, 2.5 J/cm2, 30 sec total ablation, 8Hz, 240 shots										Andersen (2002) Correction		U-Pb Data for Wetherill plot3					U-Pb Data for Tera-Wasserburg plot3				Th-Pb Data3		Dates (Ma)5								206Pb/238U-207Pb/235U	206Pb/238U-207Pb/206Pb			Grain dimensions
Count	File sequence	Grain-Analysis Number	Source file	Date	Duration (s)	Points	U ppm1	Th/U1	204Pb cps	206Pb/204Pb	Corrected2 Final Fraction Common Pb	Correction Used	207Pb/235U	2sprop4	206Pb/238U	2sprop4	Error Correlation Rho	238U/206Pb	2sint4	207Pb/206Pb	2sprop4	208Pb/232Th	2sprop4	207Pb/235U	2sprop4	206Pb/238U	2sprop4	207Pb/206Pb	2sprop4	208Pb/232Th	2sprop4	% Conc6	% Conc7	Preferred Age8	2sprop4	Length (mm)	Width (mm)	[Length + Width]/2
1	Pierre_added_2	3_1	8567c_TRA_Data	14/11/2018	14.436	73	435	0.597701	48	1012.5	0.0022	no	0.0688	0.0023	0.01038	0.00031	0.207	96.3391	1.5	0.048	0.0013	0.00375	0.00013	67.5	2.2	66.5	2	164	34	75.7	2.6	98.5185	40.5488	66.5	2	37.911	28.379	33.145
2	Pierre_added_6	7	8567c_TRA_Data	14/11/2018	15.462	77	45.7	0.743982	13	366.923	0.0062	no	0.0733	0.0069	0.01051	0.00044	0.07	95.1475	3.4	0.0508	0.005	0.00312	0.00028	71.4	6.5	67.4	2.8	469	97	62.9	5.5	94.3978	14.371	67.4	2.8	30.292	27.616	28.954
3	Pierre_Exp8_0	72887	8520c_TRA_Data	06/11/2018	31.411	158	84	1.45238	76	96.0526	0.0065	no	0.0731	0.0046	0.01058	0.00027	0.05	94.518	2.4	0.0518	0.0035	0.00322	0.00018	72.3	4.5	67.9	1.7	496	67	64.9	3.6	93.9142	13.6895	67.9	1.7	85.098	48.99	67.044
4	Pierre_Exp8_5	74419	8520c_TRA_Data	06/11/2018	10.66	54	192	1.48438	22	736.364	0.0036	no	0.0711	0.0039	0.01063	0.00032	0.40574	94.0734	2.7	0.0483	0.0024	0.00316	0.00021	69.7	3.7	68.2	2	273	51	63.8	4.3	97.8479	24.9817	68.2	2	49.358	31.119	40.2385
5	Pierre_added_7	8	8567c_TRA_Data	14/11/2018	16.747	84	172	0.569186	61	306.557	0.0174	yes	0.0686	0.0016	0.01073	0.00036	0.95845	94.1	2	0.046104	1.9e-05	0.00321	0.00023	67.3	1.6	68.8	2.3	3.08	0.99	64.7	4.7	102.229	2233.77	68.8	2.3	37.206	27.89	32.548
6	Pierre_Exp6_4	63589	8516c_TRA_Data	06/11/2018	6.5657	33	220.3	0.776214	32	560	0.0275	yes	0.0681	0.0027	0.0108	0.00044	0.87959	93.5	3.1	0.046127	4e-05	0.00346	0.00024	66.9	2.6	69.2	2.8	4.3	2.1	69.8	4.8	103.438	1609.3	69.2	2.8	46.392	34.667	40.5295
7	Pierre_disco_7	107	8572c_TRA_Data	16/11/2018	5.0529	25	262	0.584351	10	4520	0.0179	yes	0.0693	0.0014	0.01089	0.00033	0.99777	92	1.8	0.046097	1.6e-05	0.00296	0.00025	68	1.3	69.8	2.1	2.7	0.85	59.6	5	102.647	2585.19	69.8	2.1	37.203	30.836	34.0195
8	Pierre_disco_9	155	8577c_TRA_Data	16/11/2018	3.8811	20	523	0.306692	30	2753.33	0.005	no	0.0757	0.0028	0.01095	0.00021	0.36007	91.3242	1.4	0.0503	0.0017	0.00324	0.00021	74.1	2.7	70.2	1.4	222	49	65.4	4.2	94.7368	31.6216	70.2	1.4	34.206	25.87	30.038
9	Pierre_Exp2_1	10947	8508c_TRA_Data	06/11/2018	4.2637	22	170.8	1.5281	110	191.273	0.0134	yes	0.0702	0.0025	0.01103	0.00049	0.99951	91.2	3.1	0.0461	1.2e-05	0.0033	0.00017	68.8	2.3	70.7	3.1	2.87	0.64	66.7	3.4	102.762	2463.41	70.7	3.1	66.631	25.023	45.827
10	Pierre_disco_8	190	8580c_TRA_Data	16/11/2018	22.078	111	336	0.910714	11	5481.82	0.0016	no	0.0731	0.0016	0.011139	9.3e-05	0.12848	89.7747	0.78	0.0475	0.0011	0.003331	0.00011	71.6	1.5	71.41	0.59	148	24	67.2	2.2	99.7346	48.25	71.41	0.59	48.644	27.928	38.286
11	Pierre_Exp10_7	63966	8524c_TRA_Data	06/11/2018	27.614	139	138	0.753623	11	1145.45	0.0011	no	0.0733	0.0039	0.01122	0.00034	0.10893	89.1266	1.5	0.0468	0.0022	0.00363	0.00022	71.6	3.7	71.9	2.2	306	45	73.2	4.4	100.419	23.4967	71.9	2.2	48.629	27.814	38.2215
12	Pierre_Exp6_5	63806	8516c_TRA_Data	06/11/2018	10.402	52	333	0.321321	85	338.235	0.0046	no	0.0779	0.0036	0.01127	0.00028	0.15972	88.7311	1.6	0.0496	0.0019	0.00394	0.00022	76.1	3.4	72.2	1.8	254	46	79.4	4.4	94.8752	28.4252	72.2	1.8	52.844	35.861	44.3525
13	Pierre_disco_9	191	8581c_TRA_Data	16/11/2018	28.009	141	85.5	1.35906	16	972.5	0.0025	no	0.0754	0.0025	0.01129	0.00014	0.26219	88.574	1.1	0.0483	0.0016	0.003374	0.00012	73.8	2.4	72.37	0.89	235	37	68.1	2.5	98.0623	30.7957	72.37	0.89	38.704	32.567	35.6355
14	Pierre_Exp9_1	87948	8522c_TRA_Data	06/11/2018	12.584	64	1290	1.46512	118	906.78	0.0132	yes	0.07251	0.0012	0.0114	0.00067	0.99896	87.9	1.1	0.0460911	4.7e-06	0.003098	8.9e-05	71.07	1.1	73.1	4.3	2.39	0.25	62.5	1.8	102.856	3058.58	73.1	4.3	64.097	20.308	42.2025
15	Pierre_disco_7	128	8574c_TRA_Data	16/11/2018	17.75	89	235	0.821277	7	6285.71	0.002	no	0.0758	0.0023	0.01145	0.00024	0.02	87.3362	1.1	0.0489	0.0015	0.003626	0.00011	74.1	2.2	73.39	1.6	183	28	73.2	2.1	99.0418	40.1038	73.39	1.6	43.928	26.753	35.3405
16	Pierre_Exp2_14	18092	8509c_TRA_Data	06/11/2018	28.121	142	123.3	1.51338	39	441.795	0.0015	no	0.0751	0.0028	0.01159	0.00038	0.2848	86.2813	1.3	0.0473	0.0016	0.003599	8.1e-05	73.7	2.8	74.2	2.4	212	41	72.6	1.6	100.678	35	74.2	2.4	39.986	34.166	37.076
17	Pierre_disco_12	159	8577c_TRA_Data	16/11/2018	16.119	81	505	0.566337	21	3914.29	0.0044	no	0.0795	0.0018	0.01159	0.0002	0.37803	86.2813	1.1	0.0499	0.0011	0.003762	0.00017	77.7	1.7	74.29	1.3	211	26	75.9	3.4	95.6113	35.2085	74.29	1.3	38.793	29.802	34.2975
18	Pierre_Exp4_2	29499	8512c_TRA_Data	06/11/2018	3.4716	18	1215	1.38765	30	4936.67	0.0072	no	0.0827	0.006	0.0116	0.00034	0.32527	86.2069	1.9	0.0517	0.0033	0.00315	0.00013	80.6	5.6	74.3	2.2	270	110	63.5	2.6	92.1836	27.5185	74.3	2.2	63.73	21.75	42.74
19	Pierre_Exp8_6	75171	8520c_TRA_Data	06/11/2018	19.02	94	207	0.396618	38	528.947	0.0021	no	0.0762	0.0032	0.0116	0.00025	0.04	86.2069	1.7	0.0478	0.0022	0.00326	0.00023	74.5	3	74.4	1.6	289	58	65.7	4.7	99.8658	25.7439	74.4	1.6	65.29	24.191	44.7405
20	Pierre_disco_6	188	8580c_TRA_Data	16/11/2018	13.639	69	518	1.48456	173	547.399	0.0029	no	0.0782	0.0014	0.01173	0.00013	0.2138	85.2515	0.95	0.0486	0.00092	0.003253	0.00011	76.4	1.3	75.18	0.83	142	20	65.7	2.2	98.4031	52.9437	75.18	0.83	67.049	26.472	46.7605
21	Pierre_disco_14	114	8573c_TRA_Data	16/11/2018	10.964	56	1102	0.756806	1350	171.111	0.122	yes	0.07503	0.00093	0.01179	0.0002	0.98056	85	1	0.0460777	2.7e-06	0.00274	0.00015	73.46	0.87	75.53	1.3	1.68	0.14	55.2	3	102.818	4495.83	75.53	1.3	40.946	17.973	29.4595
22	Pierre_Exp9_0	84495	8522c_TRA_Data	06/11/2018	11.724	59	919	0.762786	24	3341.67	0.0032	no	0.0798	0.0025	0.01182	0.00069	0.2151	84.6024	1.5	0.0482	0.0014	0.00403	0.00013	77.9	2.3	75.8	4.4	181	34	81.3	2.6	97.3042	41.8785	75.8	4.4	42.624	34.934	38.779
23	Pierre_Exp3_8	25016	8510c_TRA_Data	06/11/2018	2.9632	15	411	1.73479	180	296.667	0.0064	no	0.0843	0.0048	0.01198	0.00043	0.1937	83.4724	2.3	0.0508	0.0028	0.00389	0.00019	82.2	4.5	76.8	2.8	335	51	78.4	3.8	93.4307	22.9254	76.8	2.8	87.655	29.671	58.663
24	Pierre_Exp5_11	52148	8515c_TRA_Data	06/11/2018	21.302	108	286	1.46853	17	1811.76	0.0015	no	0.0792	0.0027	0.0122	0.00025	0.20176	81.9672	1.4	0.0476	0.0017	0.003416	0.00012	77.3	2.5	78.2	1.6	179	32	68.9	2.5	101.164	43.6872	78.2	1.6	47.067	26.728	36.8975
25	Pierre_Exp5_6	46502	8514c_TRA_Data	06/11/2018	28.12	142	485	0.476289	36	1494.44	0.0019	no	0.0811	0.002	0.01234	0.0002	0.2745	81.0373	0.97	0.04791	0.0013	0.003432	0.00011	79.1	1.9	79.08	1.3	171	32	69.2	2.3	99.9747	46.2456	79.08	1.3	48.93	27.99	38.46
26	Pierre_Exp5_9	51861	8515c_TRA_Data	06/11/2018	13.955	71	127.4	1.38383	18	766.111	0.0038	no	0.0851	0.005	0.0126	0.0003	0.2277	79.3651	1.6	0.0493	0.0029	0.00357	0.00017	82.8	4.7	80.7	1.9	348	63	72	3.3	97.4638	23.1897	80.7	1.9	58.128	33.044	45.586
27	Pierre_Exp7_5	67366	8518c_TRA_Data	06/11/2018	5.6207	28	1301	0.916218	270	454.444	0.0204	yes	0.08	0.002	0.0126	0.0004	1	79.6	1.5	0.0460692	5.1e-07	0.0025	0.00015	78.1	1.9	80.7	2.5	1.242	0.027	50.4	3.1	103.329	6497.58	80.7	2.5	59.698	20.79	40.244
28	Pierre_disco_3	169	8578c_TRA_Data	16/11/2018	5.3183	27	3890	0.323907	200	3420	0.0078	no	0.0933	0.011	0.01295	0.00039	0.14291	77.2201	1.1	0.05165	0.0048	0.00394	0.00066	90.6	9.9	83	2.5	262	25	79.6	13	91.6115	31.6794	83	2.5	40.286	25.695	32.9905
29	Pierre_Exp4_0	28249	8512c_TRA_Data	06/11/2018	17.215	87	1390	1.20863	33	6393.94	0.00239	no	0.0863	0.0028	0.01297	0.00029	0.32326	77.101	0.78	0.04831	0.00098	0.00398	0.00017	84	2.6	83.09	1.8	127	24	80.2	3.4	98.9167	65.4252	83.09	1.8	54.848	26.61	40.729
30	Pierre_added_1	2	8567c_TRA_Data	14/11/2018	11.988	61	531	0.717514	31	2161.29	0.0042	no	0.0905	0.0037	0.01328	0.00041	0.12	75.3012	1.3	0.0496	0.0019	0.00405	0.00025	87.9	3.5	85.1	2.6	278	72	81.6	5	96.8146	30.6115	85.1	2.6	41.227	29.061	35.144
31	Pierre_Exp6_12	65021	8517c_TRA_Data	06/11/2018	6.6536	32	833	0.612245	20	4315	0.0068	no	0.0979	0.0044	0.01362	0.00043	0.17301	73.4214	1.8	0.0512	0.002	0.00356	0.00018	94.8	4	87.2	2.8	277	48	71.9	3.7	91.9831	31.4801	87.2	2.8	53.442	24.555	38.9985
32	Pierre_Exp9_9	98479	8522c_TRA_Data	06/11/2018	22.682	113	732	0.680328	297	352.189	0.0178	yes	0.08687	0.00075	0.01362	0.00071	0.947	73.56	0.6	0.046267	9.2e-05	0.004253	8.8e-05	84.58	0.7	87.21	4.5	11.4	4.7	85.8	1.8	103.109	765	87.21	4.5	47.177	24.767	35.972
33	Pierre_Exp5_7	50851	8514c_TRA_Data	06/11/2018	28.122	142	1040	1.07981	21	6138.1	0.00165	no	0.0901	0.002	0.01374	0.00019	0.32098	72.7802	0.61	0.04778	0.0011	0.003913	0.00012	87.6	1.8	87.99	1.2	127	29	78.9	2.3	100.445	69.2835	87.99	1.2	43.939	26.437	35.188
34	Pierre_Exp5_10	52074	8515c_TRA_Data	06/11/2018	7.9821	40	966	0.421325	70	1611.43	0.0073	no	0.0967	0.0034	0.01374	0.00033	0.38764	72.7802	1.5	0.052	0.0023	0.00401	0.00028	93.6	3.2	88	2.1	348	77	80.9	5.6	94.0171	25.2874	88	2.1	63.069	19.254	41.1615
35	Pierre_added_3	4	8567c_TRA_Data	14/11/2018	21.933	110	3090	0.563107	2670	186.517	0.1341	yes	0.0893	0.0033	0.01406	0.00052	0.99994	72.1	1.6	0.0460748	6.6e-07	0.00207	0.00017	86.8	3.1	90	3.3	1.535	0.034	41.9	3.5	103.687	5863.19	90	3.3	37.134	25.544	31.339
36	Pierre_exp1_8	6097	8506c_TRA_Data	06/11/2018	22.998	114	2247	0.966177	71	5971.83	0.00206	no	0.0963	0.0018	0.01449	0.00023	0.71175	69.0131	0.95	0.04869	0.00077	0.003935	8.3e-05	93.4	1.6	92.7	1.4	132	21	79.4	1.7	99.2505	70.2273	92.7	1.4	47.584	27.79	37.687
37	Pierre_exp1_15	8891	8507c_TRA_Data	06/11/2018	3.0163	15	1187	0.492839	80	2691.25	0.0064	no	0.1065	0.004	0.01496	0.00032	0.52062	66.8449	1.4	0.0496	0.0016	0.00464	0.00014	102.7	3.6	95.7	2	175	46	93.5	2.9	93.184	54.6857	95.7	2	35.878	25.17	30.524
38	Pierre_disco_11	193	8581c_TRA_Data	16/11/2018	9.0359	45	1140	0.381579	46	5160.87	0.0028	no	0.1034	0.0016	0.01541	0.00021	0.22672	64.8929	0.9	0.04898	0.0009	0.00519	0.00021	99.9	1.5	98.6	1.3	156	25	104.5	4.1	98.6987	63.2051	98.6	1.3	33.968	27.663	30.8155
39	Pierre_Exp3_1	21138	8510c_TRA_Data	06/11/2018	19.983	101	726	0.698347	1	137800	0.0036	no	0.1054	0.0029	0.01551	0.00041	0.24333	64.4745	0.64	0.04934	0.0008	0.00517	0.00019	101.7	2.7	99.24	2.6	183	21	104.2	3.7	97.5811	54.2295	99.24	2.6	45.447	28.053	36.75
40	Pierre_Exp9_11	98913	8523c_TRA_Data	06/11/2018	18.626	92	103.9	2.37729	435	36.1149	0.0794	yes	0.1061	0.0033	0.01669	0.0012	0.9993	60.6	1.6	0.046091	1.3e-05	0.00551	0.00026	102.4	3	106.7	7.3	2.37	0.65	111.1	5.1	104.199	4502.11	106.7	7.3	43.891	27.923	35.907
41	Pierre_Exp3_5	23894-1	8510c_TRA_Data	06/11/2018	19.65	99	10500	0.678095	36200	83.1492	0.258	yes	0.1088	0.005	0.01712	0.00089	0.99563	60	2.4	0.046091	3.7e-05	0.00153	0.00032	104.7	4.5	109.4	5.6	2.4	1.9	30.8	6.4	104.489	4558.33	109.4	5.6	30.324	21.983	26.1535
42	Pierre_Exp9_12	99502	8523c_TRA_Data	06/11/2018	6.1491	31	529	1.43289	250	341.2	0.0299	yes	0.1104	0.0027	0.01733	0.0011	0.98622	57.9	1.1	0.04612	6.9e-05	0.0045	0.00029	106.3	2.4	110.8	6.9	3.9	3.6	90.8	5.8	104.233	2841.03	110.8	6.9	87.582	17.609	52.5955
43	Pierre_disco_6	106	8572c_TRA_Data	16/11/2018	20.404	103	500	0.717	15	10606.7	0.00241	no	0.1285	0.0028	0.01914	0.00047	0.44939	52.2466	0.48	0.04862	0.00075	0.0063	0.00019	122.7	2.5	122.2	3	145	19	127	3.9	99.5925	84.2759	122.2	3	40.217	24.124	32.1705
44	Pierre_Exp8_16	84234	8521c_TRA_Data	06/11/2018	18.34	92	365.3	2.07774	112	611.607	0.0263	yes	0.1298	0.0017	0.02042	0.00029	0.99696	49.16	0.64	0.0460747	2.6e-06	0.00755	0.00029	123.9	1.6	130.3	1.9	1.53	0.14	152.1	5.8	105.165	8516.34	130.3	1.9	42.441	33.301	37.871
45	Pierre_Exp2_16	18382	8509c_TRA_Data	06/11/2018	11.993	61	94.2	1.66667	42	604.762	0.0197	yes	0.1399	0.0092	0.0217	0.0013	0.97384	48	2.4	0.04641	0.00025	0.00601	0.00054	132.6	8.2	138	8.2	19	13	121	11	104.072	726.316	138	8.2	48.761	30.943	39.852
46	Pierre_Exp10_3	9951	8524c_TRA_Data	06/11/2018	28.118	142	439	1.44191	30	2763.33	0.00448	no	0.1499	0.0046	0.02177	0.00059	0.40465	45.9348	0.48	0.05058	0.001	0.00796	0.00037	141.7	4	138.8	3.8	240	24	160.2	7.4	97.9534	57.8333	138.8	3.8	52.374	29.919	41.1465
47	Pierre_Exp9_6	97495	8522c_TRA_Data	06/11/2018	16.993	86	479	1.96242	71	1559.15	0.008	no	0.1608	0.0063	0.02232	0.0013	0.17035	44.8029	0.67	0.0534	0.002	0.00783	0.00017	151.2	5.4	142.3	8	359	71	157.6	3.4	94.1138	39.6379	142.3	8	43.688	29.249	36.4685
48	Pierre_disco_4	150	8576c_TRA_Data	16/11/2018	15.307	78	513	1.36842	314	1270.7	0.0149	no	0.1806	0.0024	0.02275	0.00042	0.08	43.956	0.65	0.0576	0.0011	0.00554	0.00025	168.5	2.1	145	2.6	506	39	111.6	5.1	86.0534	28.6561	145	2.6	33.581	25.251	29.416
49	Pierre_Exp6_9	64273	8517c_TRA_Data	06/11/2018	15.498	76	149.7	1.2151	3	8933.33	0.0053	no	0.1618	0.007	0.023	0.00055	0.058234	43.4783	0.68	0.0505	0.0018	0.00735	0.00023	152	6.1	146.6	3.5	325	49	147.9	4.5	96.4474	45.1077	146.6	3.5	47.047	32.233	39.64
50	Pierre_disco_12	112	8573c_TRA_Data	16/11/2018	18.438	93	432	0.886574	10	16710	0.0046	no	0.1632	0.0036	0.02343	0.00059	0.51313	42.6803	0.45	0.05047	0.00077	0.00719	0.0002	153.4	3.2	149.3	3.7	224	21	144.7	4.1	97.3272	66.6518	149.3	3.7	34.167	30.632	32.3995
51	Pierre_Exp4_12	36661	8513c_TRA_Data	06/11/2018	7.2181	36	1822	1.92097	10	39800	0.0043	no	0.1636	0.0055	0.02358	0.00061	0.43942	42.4088	0.72	0.05021	0.0011	0.00719	0.00038	153.9	4.8	150.3	3.9	204	29	144.8	7.5	97.6608	73.6765	150.3	3.9	58.088	26.195	42.1415
52	Pierre_Exp2_2	11197	8508c_TRA_Data	06/11/2018	9.73	49	1347	4.23905	64	5889.06	0.0041	no	0.1647	0.0054	0.02374	0.00076	0.48199	42.123	0.58	0.0501	0.0012	0.00675	0.00012	155.5	5.1	151.3	4.8	209	48	135.9	2.4	97.299	72.3923	151.3	4.8	51.103	29.156	40.1295
53	Pierre_Exp9_8	98474	8522c_TRA_Data	06/11/2018	11.421	58	817	1.37087	260	730.769	0.0062	no	0.1701	0.0041	0.02411	0.0014	0.015154	41.4766	0.54	0.05199	0.0012	0.00728	0.00017	159.4	3.6	153.5	8.6	279	28	146.7	3.4	96.2986	55.0179	153.5	8.6	55.183	24.414	39.7985
54	Pierre_Exp3_10	25825	8511c_TRA_Data	06/11/2018	10.541	53	870	0.812644	194	1262.89	0.0161	yes	0.16	0.0031	0.02469	0.00067	0.83234	40.59	0.51	0.04707	0.00039	0.00741	0.00026	150.7	2.7	157.2	4.2	51	20	149.1	5.1	104.313	308.235	157.2	4.2	56.705	23.594	40.1495
55	Pierre_disco_11	133	8575c_TRA_Data	16/11/2018	10.16	52	1010	0.738614	266	1575.19	0.0122	yes	0.1614	0.003	0.02499	0.00055	0.85833	40.12	0.57	0.04682	0.0004	0.0057	0.00046	151.9	2.6	159.1	3.5	39	20	114.9	9.3	104.74	407.949	159.1	3.5	42.638	23.59	33.114
56	Pierre_Exp6_0	62908	8516c_TRA_Data	06/11/2018	18.843	95	1066	0.739212	66	3106.06	0.00312	no	0.1737	0.0048	0.02523	0.00054	0.46208	39.6354	0.37	0.05026	0.00066	0.00826	0.00014	162.5	4.1	160.6	3.4	206	16	166.2	2.8	98.8308	77.9612	160.6	3.4	45.401	31.202	38.3015
57	Pierre_Exp7_7	67913	8518c_TRA_Data	06/11/2018	19.774	100	385	2.25455	28	2907.14	0.0038	no	0.1773	0.0054	0.02539	0.00058	0.14929	39.3856	0.39	0.05053	0.0012	0.00796	0.00029	165.7	4.6	161.6	3.6	216	25	160.3	5.7	97.5256	74.8148	161.6	3.6	57.515	20.206	38.8605
58	Pierre_Exp2_8	14764	8509c_TRA_Data	06/11/2018	12.317	62	815	0.742331	51	4790.2	0.0037	no	0.1766	0.0049	0.02553	0.00085	0.40579	39.1696	0.63	0.04993	0.0011	0.00882	0.00028	165.1	4.2	162.5	5.3	198	31	177.5	5.7	98.4252	82.0707	162.5	5.3	50.237	29.457	39.847
59	Pierre_Exp2_15	18120	8509c_TRA_Data	06/11/2018	13.118	66	957	0.855799	35	8162.86	0.003	no	0.1754	0.0046	0.02559	0.00083	0.41752	39.0778	0.56	0.04978	0.00094	0.00823	0.00015	164	4	162.9	5.2	183	22	165.6	3	99.3293	89.0164	162.9	5.2	43.742	30.861	37.3015
60	Pierre_Exp3_2	21234	8510c_TRA_Data	06/11/2018	14.13	70	196	1.07806	73	820.548	0.0018	no	0.175	0.0058	0.02602	0.00075	0.36212	38.432	0.6	0.0488	0.0011	0.00824	0.00029	163.6	5	165.6	4.7	167	23	165.8	5.8	101.222	99.1617	165.6	4.7	54.082	37.863	45.9725
61	Pierre_added_15	16	8568c_TRA_Data	14/11/2018	5.6261	29	825	1.55879	68	3185.29	0.0097	no	0.1985	0.0079	0.02662	0.00081	0.12625	37.5657	0.62	0.054	0.0019	0.00799	0.00041	183.8	6.7	169.4	5.1	362	61	160.9	8.1	92.1654	46.7956	169.4	5.1	39.794	25.469	32.6315
62	Pierre_disco_0	100	8572c_TRA_Data	16/11/2018	4.8861	25	14300	0.166434	6400	1062.5	0.0392	yes	0.208	0.017	0.031	0.0021	0.99118	33.1	2.1	0.04848	0.00099	-0.00441	0.00085	191	15	196	13	119	48	-89	17	102.618	164.706	196	13	40.001	31.385	35.693
63	Pierre_Exp10_0	2174	8524c_TRA_Data	06/11/2018	6.8859	35	1163	0.392089	60	5650	0.0057	no	0.2622	0.0095	0.03627	0.0011	0.51812	27.571	0.48	0.0531	0.0013	0.01238	0.00072	236.4	7.6	229.7	6.9	332	32	248.7	14	97.1658	69.1867	229.7	6.9	58.128	30.279	44.2035
64	Pierre_Exp4_3	29607	8512c_TRA_Data	06/11/2018	11.531	58	4920	0.346341	6060	392.739	0.0756	yes	0.2702	0.0084	0.0383	0.00094	0.89011	26.17	0.33	0.051448	9.7e-05	-0.00152	0.00031	242.8	6.7	242.3	5.8	260.9	4.3	-30.8	6.3	99.7941	92.8708	242.3	5.8	47.281	32.469	39.875
65	Pierre_exp1_5	3251	8506c_TRA_Data	06/11/2018	7.9028	40	2326	1.1178	70	15814.3	0.0083	no	0.3004	0.0044	0.04016	0.00062	0.49022	24.9004	0.38	0.0523	0.00098	0.01049	0.00045	266.7	3.4	253.8	3.9	297	26	210.8	8.9	95.1631	85.4545	253.8	3.9	64.08	27.189	45.6345
66	Pierre_Exp4_16	40917	8513c_TRA_Data	06/11/2018	18.964	95	5830	0.552316	2010	1238.81	0.0596	yes	0.318	0.028	0.0443	0.0032	0.99873	25.5	1.8	0.05071	0.0012	-0.00047	0.00024	275	22	279	20	217	53	-9.4	4.9	101.455	128.571	279	20	65.474	40.775	53.1245
67	Pierre_disco_1	183	8580c_TRA_Data	16/11/2018	17.308	87	1276	0.62931	122	7270.49	0.0095	no	0.3675	0.0052	0.04814	0.00067	0.80399	20.7727	0.29	0.0557	0.00062	0.0122	0.0005	317.7	3.9	303.1	4.1	438	17	245.1	9.9	95.4045	69.2009	303.1	4.1	43.777	24.577	34.177
68	Pierre_Exp5_13	57065	8515c_TRA_Data	06/11/2018	19.507	98	3080	0.479221	1310	1100	0.0595	yes	0.3386	0.015	0.04932	0.00098	0.93438	20.4	0.33	0.04958	0.0019	0.00285	0.00042	295.4	11	310.3	6	166	87	57.5	8.4	105.044	186.928	310.3	6	60.181	39.487	49.834
69	Pierre_Exp8_7	75439	8520c_TRA_Data	06/11/2018	8.5796	43	4800	0.397917	2360	991.525	0.0646	yes	0.365	0.025	0.0501	0.0029	0.99268	19.82	0.98	0.05277	0.00084	-0.0033	0.0025	314	19	315	18	315	38	-67	52	100.318	100	315	18	63.098	35.462	49.28
70	Pierre_Exp2_9	15229	8509c_TRA_Data	06/11/2018	9.1236	46	878	1.37927	103	5320.39	0.0108	no	0.3889	0.011	0.05114	0.0017	0.66095	19.5542	0.29	0.05534	0.00088	0.01227	0.00027	333.4	7.9	321.5	10	437	27	246.4	5.4	96.4307	73.5698	321.5	10	45.003	32.489	38.746
71	Pierre_Exp10_5	62404	8524c_TRA_Data	06/11/2018	13.062	66	953	1.01049	123	3634.15	0.0114	no	0.4542	0.014	0.0575	0.0018	0.65933	17.3913	0.3	0.05827	0.0011	0.01604	0.00085	380	9.7	360.1	11	539	24	321.7	17	94.7632	66.8089	360.1	11	48.171	29.369	38.77
72	Pierre_Exp2_3	11421	8508c_TRA_Data	06/11/2018	12.68	64	374	0.496524	1	257600	0.0089	no	0.4616	0.013	0.05844	0.0019	0.55392	17.1116	0.23	0.05701	0.0011	0.01495	0.00041	385.1	9	366.1	11	491	23	299.9	8.2	95.0662	74.5621	366.1	11	44.079	29.662	36.8705
73	Pierre_Exp8_15	81756	8521c_TRA_Data	06/11/2018	16.679	84	2030	0.36601	1800	614.444	0.0701	yes	0.43	0.014	0.0586	0.0012	0.90935	17.19	0.33	0.05301	0.00095	0.00981	0.001	362.1	9.6	367.2	7.3	322	44	197	20	101.408	114.037	367.2	7.3	68.948	38.478	53.713
74	Pierre_Exp8_2	73319	8520c_TRA_Data	06/11/2018	18.671	94	565	0.293805	48	6000	0.00162	no	0.4598	0.01	0.06156	0.0011	0.60612	16.2443	0.25	0.0549	0.00093	0.01813	0.00086	383.7	7.1	385	6.4	403	22	363	17	100.339	95.5335	385	6.4	48.272	43.106	45.689
75	Pierre_exp1_7	5212	8506c_TRA_Data	06/11/2018	14.345	72	2220	0.585586	5400	331.481	0.0777	yes	0.47	0.035	0.0624	0.0036	0.996	16.98	0.96	0.0538	0.0011	0.00361	0.00051	386	24	389	22	349	48	73	10	100.777	111.461	389	22	65.344	26.387	45.8655
76	Pierre_disco_5	125	8574c_TRA_Data	16/11/2018	3.5784	18	467	0.59743	102	4705.88	0.0084	no	0.522	0.014	0.0672	0.0023	0.45944	14.881	0.44	0.0569	0.0017	0.01699	0.00088	426.6	9.4	419	14	485	25	341	17	98.2185	86.3918	419	14	37.535	20.862	29.1985
77	Pierre_Exp10_9	64468	8524c_TRA_Data	06/11/2018	9.6919	49	4740	3.01688	3190	996.865	0.0444	yes	0.601	0.026	0.0762	0.0029	0.99973	13.24	0.35	0.05709	0.00047	0.00279	0.00016	477	16	473	17	494	18	56.2	3.2	99.1614	95.749	473	17	50.997	32.844	41.9205
78	Pierre_Exp3_16	28083	8511c_TRA_Data	06/11/2018	7.2776	37	447	1.5906	150	2580	0.0184	no	0.693	0.023	0.0783	0.0024	0.52402	12.7714	0.25	0.0641	0.0014	0.0281	0.0015	534	14	485.6	14	743	26	559	29	90.9363	65.3567	485.6	14	48.767	26.958	37.8625
79	Pierre_added_4	5	8567c_TRA_Data	14/11/2018	15.318	77	1011	1.17903	561	1702.32	0.0515	yes	0.662	0.026	0.0824	0.0028	0.99963	12.25	0.28	0.0582	0.00028	0.00853	0.0003	515	16	510	17	537	11	171.7	6.1	99.0291	94.9721	510	17	34.134	27.23	30.682
80	Pierre_Exp3_9	25784	8511c_TRA_Data	06/11/2018	19.928	100	889	0.83802	1140	826.316	0.0437	yes	0.682	0.02	0.0846	0.0029	0.97655	11.91	0.24	0.05853	0.00025	0.01831	0.00064	527	12	523.2	17	549.2	9.4	367	13	99.2789	95.2658	523.2	17	40.328	36.299	38.3135
81	Pierre_Exp6_1	63125	8516c_TRA_Data	06/11/2018	22.471	113	1820	1.45055	1670	778.443	0.0477	yes	0.7	0.018	0.0862	0.0021	0.99902	11.67	0.19	0.05879	0.00025	0.0143	0.001	537.6	10	532.7	12	559.8	9.4	286	20	99.0885	95.159	532.7	12	69.873	31.868	50.8705
82	Pierre_disco_3	185	8580c_TRA_Data	16/11/2018	13.505	68	440	1.125	870	827.586	0.0779	yes	0.782	0.03	0.0933	0.0028	0.99908	10.88	0.32	0.06055	0.00053	-0.0104	0.002	584	17	575	16	621	19	-212	42	98.4589	92.5926	575	16	49.958	24.696	37.327
83	Pierre_disco_4	170	8578c_TRA_Data	16/11/2018	7.1311	36	605	0.813223	45	17866.7	0.0053	no	0.819	0.094	0.0967	0.0035	0.68164	10.3413	0.24	0.06116	0.0056	0.03031	0.005	607	52	595	20	634	28	603	98	98.0231	93.8486	595	20	34.172	28.876	31.524
84	Pierre_disco_10	132	8575c_TRA_Data	16/11/2018	8.1035	41	2410	0.626556	560	6767.86	0.0399	yes	0.836	0.059	0.0989	0.0054	0.99932	10.36	0.49	0.06085	0.0012	-0.00526	0.00051	612	32	607	32	631	40	-107	10	99.183	96.1965	607	32	40.06	21.358	30.709
85	Pierre_Exp5_0	41502	8514c_TRA_Data	06/11/2018	17.203	87	2170	1.27189	1360	1455.88	0.0508	yes	0.871	0.053	0.1015	0.0045	0.99896	10.22	0.4	0.06152	0.0017	0.00378	0.00045	629	28	622	26	653	59	76.2	9.1	98.8871	95.2527	622	26	63.613	22.471	43.042
86	Pierre_Exp4_4	30425	8512c_TRA_Data	06/11/2018	22.823	115	1680	1.07738	2460	906.504	0.0539	yes	1.037	0.057	0.1159	0.0047	0.99882	8.93	0.31	0.06424	0.00076	0.01472	0.0007	715	28	705	27	744	25	295	14	98.6014	94.7581	705	27	50.086	28.622	39.354
87	Pierre_disco_5	151	8577c_TRA_Data	16/11/2018	16.181	81	1930	0.363212	7010	512.126	0.0519	yes	1.131	0.021	0.1248	0.0024	0.96931	8	0.11	0.06577	0.00033	0.0144	0.0015	767.3	9.9	758.2	14	799	10	289	30	98.814	94.8936	758.2	14	62.12	38.431	50.2755
88	Pierre_Exp4_15	39975	8513c_TRA_Data	06/11/2018	6.6658	33	2144	0.345616	290	9827.59	0.1038	yes	1.242	0.082	0.1309	0.0059	0.99854	7.73	0.29	0.0684	0.0013	-0.0235	0.0031	816	36	793	33	878	39	-481	65	97.1814	90.3189	793	33	47.397	28.873	38.135
89	Pierre_Exp3_11	26868	8511c_TRA_Data	06/11/2018	15.807	79	1660	1.37952	620	4467.74	0.0387	yes	1.313	0.071	0.1386	0.0057	0.99698	7.38	0.25	0.06814	0.0009	0.0152	0.0012	845	31	836	32	868	27	305	25	98.9349	96.3134	836	32	46.312	29.708	38.01
90	Pierre_Exp10_1	2933	8524c_TRA_Data	06/11/2018	9.7914	49	3000	1.42333	1000	3840	0.0383	yes	1.338	0.052	0.1415	0.0042	0.99934	7.084	0.095	0.06854	0.00057	0.02622	0.0014	862	22	853	24	885	17	523	27	98.9559	96.3842	853	24	53.425	24.865	39.145
91	Pierre_disco_14	137	8575c_TRA_Data	16/11/2018	14.446	73	3980	0.112312	384	23619.8	0.0217	yes	1.392	0.088	0.1421	0.0047	0.95036	7.14	0.2	0.0704	0.002	-0.0261	0.0088	878	36	856	26	929	52	-550	180	97.4943	92.1421	856	26	34.622	28.685	31.6535
92	Pierre_Exp10_4	9951-1	8524c_TRA_Data	06/11/2018	8.6758	43	238.3	0.819555	125	2248	0.0265	yes	1.35	0.073	0.1424	0.0057	0.99319	7.05	0.24	0.06848	0.0009	0.0223	0.0024	864	31	858	32	881	27	446	47	99.3056	97.3893	858	32	41.069	21.26	31.1645
93	Pierre_disco_16	140	8575c_TRA_Data	16/11/2018	13.834	70	410	0.612195	333	2975.98	0.0206	yes	1.461	0.077	0.1435	0.0032	0.76782	6.986	0.084	0.0737	0.0021	0.0352	0.0027	912	31	864.3	18	1026	55	697	53	94.7697	84.2398	864.3	18	40.337	27.146	33.7415
94	Pierre_disco_10	192	8581c_TRA_Data	16/11/2018	10.821	54	1199	0.3995	710	3492.96	0.0472	yes	1.414	0.067	0.1443	0.0039	0.95793	6.99	0.18	0.0704	0.0013	0.0205	0.004	890	27	868	22	934	37	409	79	97.5281	92.9336	868	22	40.477	26.769	33.623
95	Pierre_Exp3_13	27489	8511c_TRA_Data	06/11/2018	15.134	76	2230	0.216592	620	6177.42	0.0357	yes	1.5	0.14	0.1467	0.0079	0.97838	7.07	0.3	0.072	0.0024	0.0012	0.0063	908	51	880	44	963	61	20	130	96.9163	91.3811	880	44	43.377	33.742	38.5595
96	Pierre_added_0	1	8567c_TRA_Data	14/11/2018	15.918	81	571	0.299475	331	2604.23	0.0161	yes	1.453	0.075	0.1469	0.0056	0.94422	6.9	0.18	0.0714	0.0011	0.0289	0.0029	906	31	883	31	963	31	574	56	97.4614	91.6926	883	31	37.751	25.97	31.8605
97	Pierre_Exp6_2	63125-1	8516c_TRA_Data	06/11/2018	22.241	112	5890	1.14261	2710	2734.32	0.0192	yes	1.556	0.087	0.1579	0.0044	0.99857	6.4	0.12	0.07121	0.00054	0.0232	0.0013	949	34	944	25	961	15	463	25	99.4731	98.231	944	25	33.057	20.276	26.6665
98	Pierre_Exp2_11	15947	8509c_TRA_Data	06/11/2018	9.3619	47	52.3	0.756597	43	2255.81	0.0033	no	1.668	0.053	0.1662	0.0059	0.60434	6.01685	0.12	0.0721	0.0016	0.0518	0.0018	995	20	991	33	986	27	1021	35	99.598	100.507	991	33	39.646	36.309	37.9775
99	Pierre_Exp3_7	24265	8510c_TRA_Data	06/11/2018	8.5585	43	289	1.50519	190	2942.11	0.0126	yes	1.711	0.078	0.1693	0.0053	0.99947	5.924	0.096	0.07323	0.00048	0.0326	0.0014	1012	30	1008	29	1020	13	649	27	99.6047	98.8235	1008	29	50.323	23.641	36.982
100	Pierre_Exp5_12	53113	8515c_TRA_Data	06/11/2018	11.702	59	437	0.659039	133	4932.33	-0.0017	no	1.863	0.046	0.1743	0.0034	0.77223	5.73724	0.091	0.0781	0.0017	0.0453	0.0016	1067	16	1036	19	1151	24	895	31	97.0947	90.0087	1036	19	42.348	32.784	37.566
101	Pierre_disco_14	196	8581c_TRA_Data	16/11/2018	14.728	75	842	0.151425	146	13616.4	0.0295	yes	1.91	0.11	0.1758	0.0056	0.93588	5.8	0.2	0.0777	0.0029	-0.024	0.012	1071	37	1042	31	1123	68	-510	240	97.2923	92.7872	1042	31	34.495	30.525	32.51
102	Pierre_Exp7_6	67438	8518c_TRA_Data	06/11/2018	8.6178	43	891	0.820426	16	72375	0.0007	no	1.837	0.053	0.1755	0.0043	0.60808	5.69801	0.079	0.0756	0.0014	0.0527	0.0021	1058.4	19	1042	24	1085	24	1038	41	98.4505	96.0369	1042	24	38.383	34.878	36.6305
103	Pierre_Exp8_10	77026	8521c_TRA_Data	06/11/2018	17.563	88	1292	0.212848	140	14214.3	0.02915	yes	1.768	0.037	0.1721	0.0023	0.99949	5.815	0.065	0.07441	0.00057	-0.0159	0.0017	1033	14	1024	13	1052	16	-325	34	99.1288	97.3384	1024	13	41.558	32.448	37.003
104	Pierre_Exp7_4	67301	8518c_TRA_Data	06/11/2018	11.406	57	195.8	1.43361	46	5802.17	0.00094	no	1.844	0.056	0.1786	0.0045	0.65659	5.5991	0.083	0.0747	0.0015	0.05333	0.002	1063	21	1059	25	1060	19	1050	38	99.6237	99.9057	1059	25	54.941	27.65	41.2955
105	Pierre_Exp7_0	65856	8518c_TRA_Data	06/11/2018	25.482	128	1620	1.97531	354	6186.44	0.0315	yes	1.974	0.13	0.1813	0.0066	0.96787	5.66	0.16	0.0766	0.0028	0.0371	0.0026	1091	42	1072	36	1116	80	734	50	98.2585	96.0573	1072	36	56.78	26.797	41.7885
106	Pierre_Exp4_6	33817	8512c_TRA_Data	06/11/2018	24.458	124	429	0.226107	32	27062.5	0.00018	no	2.056	0.06	0.1929	0.0041	0.63251	5.18403	0.041	0.07746	0.001	0.05888	0.00088	1133.9	20	1137	22	1132.4	15	1156	17	100.273	100.406	1132.4	15	57.04	37.256	47.148
107	Pierre_disco_15	139	8575c_TRA_Data	16/11/2018	6.2789	31	989	0.687563	550	5600	0.0304	yes	2.229	0.08	0.2004	0.0049	0.99913	4.998	0.078	0.0806	0.00078	0.0292	0.0022	1189	25	1178	26	1211	19	581	43	99.0749	97.275	1211	19	45.536	25.193	35.3645
108	Pierre_Exp5_3	42487	8514c_TRA_Data	06/11/2018	9.5665	48	278.8	0.511119	18	26333.3	-0.0018	no	2.266	0.052	0.193	0.0033	0.44583	5.18135	0.069	0.0841	0.002	0.0557	0.0016	1201	16	1137	18	1293	35	1095	32	94.6711	87.935	1293	35	47.312	31.698	39.505
109	Pierre_disco_9	130	8575c_TRA_Data	16/11/2018	19.249	97	338	0.372485	33	35636.4	0.0034	no	2.665	0.078	0.2256	0.006	0.93785	4.43262	0.095	0.0869	0.0012	0.0734	0.0014	1315	22	1310	31	1357	20	1432	27	99.6198	96.5365	1357	20	48.133	30.526	39.3295
110	Pierre_added_11	12	8568c_TRA_Data	14/11/2018	16.593	82	184.4	0.666486	47	8744.68	0.0059	no	2.538	0.07	0.2075	0.0063	0.84526	4.81928	0.081	0.08848	0.00084	0.0544	0.0032	1281	20	1215	34	1392	11	1069	62	94.8478	87.2845	1392	11	43.038	25.531	34.2845
111	Pierre_Exp7_2	66843	8518c_TRA_Data	06/11/2018	15.599	79	247	0.854251	41	12363.4	-0.00022	no	2.964	0.082	0.2398	0.0053	0.73723	4.17014	0.037	0.08894	0.0014	0.0713	0.0029	1397.8	21	1386	28	1402.4	19	1392	54	99.1558	98.8306	1402.4	19	38.56	33.536	36.048
112	Pierre_Exp3_4	23894	8510c_TRA_Data	06/11/2018	4.3807	22	543	0.996317	110	12645.5	0.0021	no	2.871	0.082	0.2327	0.007	0.22787	4.29738	0.075	0.0889	0.0019	0.0678	0.0023	1374	22	1348	36	1408	16	1327	43	98.1077	95.7386	1408	16	48.17	31.39	39.78
113	Pierre_disco_13	113	8573c_TRA_Data	16/11/2018	16.359	83	332.4	0.869735	115	10556.5	0.0067	no	2.757	0.05	0.2228	0.0054	0.58613	4.48833	0.038	0.08939	0.0011	0.04142	0.0013	1343.6	13	1296	29	1412.6	12	820	24	96.4573	91.7457	1412.6	12	37.073	19.679	28.376
114	Pierre_exp1_12	7908	8507c_TRA_Data	06/11/2018	10.416	53	706	0.351558	60	37100	0.00094	no	3.188	0.05	0.2519	0.0043	0.67308	3.96983	0.062	0.0903	0.0015	0.077	0.002	1454	12	1448	22	1430	17	1499	38	99.5873	101.259	1430	17	40.628	38.522	39.575
115	Pierre_Exp7_14	69148	8519c_TRA_Data	06/11/2018	22.269	112	528	1.08712	28	35821.4	0.0043	no	2.954	0.08	0.2399	0.0055	0.67408	4.1684	0.042	0.09054	0.0015	0.0726	0.0027	1395.2	21	1386	28	1436	21	1417	51	99.3406	96.5181	1436	21	49.626	27.887	38.7565
116	Pierre_Exp10_2	9905	8524c_TRA_Data	06/11/2018	6.4151	33	2091	0.496891	63	63333.3	0.0004	no	2.977	0.082	0.2416	0.007	0.54836	4.13907	0.057	0.0907	0.0016	0.0719	0.0037	1401.6	21	1395	36	1439	17	1403	69	99.5291	96.9423	1439	17	50.536	40.344	45.44
117	Pierre_Exp2_10	15252	8509c_TRA_Data	06/11/2018	9.1197	46	172	1.92442	33	14606.1	0.0086	no	3.261	0.091	0.2562	0.0095	0.48937	3.9032	0.094	0.0908	0.0019	0.0828	0.0025	1471	22	1469	49	1442	21	1608	47	99.864	101.872	1442	21	49.703	29.778	39.7405
118	Pierre_Exp7_15	71335	8519c_TRA_Data	06/11/2018	13.909	70	1533	0.826484	38	74947.4	0.0007	no	2.983	0.079	0.24	0.0053	0.48145	4.16667	0.034	0.09138	0.0015	0.0705	0.0026	1403.1	20	1386.7	27	1454	19	1377	49	98.8312	95.3714	1454	19	68.274	40.053	54.1635
119	Pierre_disco_3	148	8576c_TRA_Data	16/11/2018	7.9985	41	229	0.422707	80	21125	0.0027	no	3	0.079	0.2347	0.0053	0.87906	4.26076	0.086	0.0924	0.0012	0.046	0.006	1406	19	1359	27	1474	21	910	120	96.6572	92.1981	1474	21	43.271	30.102	36.6865
120	Pierre_disco_9	109	8572c_TRA_Data	16/11/2018	12.66	63	311.4	0.578998	52	22326.9	-0.006	no	2.977	0.064	0.2296	0.006	0.79765	4.3554	0.056	0.09397	0.0011	0.0621	0.0021	1401	16	1332	31	1505.9	12	1218	40	95.0749	88.4521	1505.9	12	35.638	27.081	31.3595
121	Pierre_Exp4_5	33019	8512c_TRA_Data	06/11/2018	12.061	61	64.7	2.55023	60	2783.33	0.0228	no	3.137	0.13	0.241	0.0083	0.85801	4.14938	0.11	0.095	0.0019	0.083	0.0021	1438	31	1391	43	1524	24	1611	38	96.7316	91.273	1524	24	51.739	38.341	45.04
122	Pierre_disco_15	164	8577c_TRA_Data	16/11/2018	9.0534	45	603	0.386401	490	4408.16	-0.0001	no	3.58	0.14	0.2701	0.0083	0.73116	3.70233	0.1	0.0974	0.0023	0.0199	0.0043	1542	28	1540	42	1574	35	396	85	99.8703	97.8399	1574	35	39.915	18.916	29.4155
123	Pierre_disco_8	129	8574c_TRA_Data	16/11/2018	4.0013	20	1600	0.17375	4070	1719.9	-0.0028	no	3.67	0.086	0.2746	0.0096	0.66077	3.64166	0.11	0.0987	0.0026	0.0496	0.0064	1564	19	1564	49	1593	37	980	120	100	98.1795	1593	37	37.825	22.217	30.021
124	Pierre_disco_1	101	8572c_TRA_Data	16/11/2018	7.157	36	1170	0.317949	180	29611.1	-0.00066	no	3.988	0.11	0.2966	0.0092	0.45223	3.37154	0.07	0.0988	0.0027	0.0769	0.0028	1630	24	1674	46	1595	44	1497	53	102.699	104.953	1595	44	39.691	26.465	33.078
125	Pierre_disco_1	119	8574c_TRA_Data	16/11/2018	25.06	126	1304	0.451687	227	22555.1	0.0053	no	3.293	0.064	0.2385	0.0048	0.36988	4.19287	0.044	0.0991	0.0015	0.0557	0.0016	1479.5	15	1379	25	1603	26	1095	32	93.2072	86.0262	1603	26	41.666	30.741	36.2035
126	Pierre_Exp3_14	27587	8511c_TRA_Data	06/11/2018	18.133	92	2010	0.0993035	299	23344.5	-0.0002	no	4.035	0.1	0.2958	0.0093	0.47674	3.38066	0.071	0.0996	0.0018	0.0627	0.0052	1640.6	21	1669	47	1607	29	1224	98	101.731	103.858	1607	29	46.658	27.103	36.8805
127	Pierre_Exp8_12	80155	8521c_TRA_Data	06/11/2018	14.133	71	265	0.950943	75	7533.33	-0.0026	no	3.771	0.059	0.269	0.0039	0.71055	3.71747	0.05	0.09942	0.0011	0.0721	0.0029	1586	13	1539	21	1609.5	12	1407	54	97.0366	95.6198	1609.5	12	37.823	35.026	36.4245
128	Pierre_Exp4_7	34851	8512c_TRA_Data	06/11/2018	8.0319	40	2670	0.182772	36	206944	-0.0012	no	3.796	0.11	0.28	0.009	0.18527	3.57143	0.094	0.0995	0.0028	0.0678	0.004	1591.6	24	1590	46	1611	41	1324	75	99.8995	98.6965	1611	41	52.816	24.026	38.421
129	Pierre_Exp7_12	68810	8519c_TRA_Data	06/11/2018	11.142	55	928	0.399784	215	8255.81	0.0032	no	3.355	0.099	0.2445	0.0063	0.68187	4.08998	0.068	0.0998	0.0019	0.0749	0.0044	1493	23	1410	33	1621	25	1457	82	94.4407	86.9833	1621	25	52.742	27.234	39.988
130	Pierre_Exp4_11	36493	8513c_TRA_Data	06/11/2018	15.07	74	637	0.43956	65	27538.5	0.00094	no	3.982	0.12	0.2867	0.0064	0.53985	3.48797	0.037	0.10063	0.0014	0.0865	0.0021	1630.1	23	1625	32	1635.1	14	1677	39	99.6871	99.3823	1635.1	14	53.409	30.035	41.722
131	Pierre_Exp2_13	17003	8509c_TRA_Data	06/11/2018	17.559	88	421	1.15914	25	54000	0.0229	no	3.582	0.085	0.2595	0.0081	0.54214	3.85357	0.044	0.101	0.0016	0.0873	0.0015	1545.1	19	1487	41	1641	17	1692	28	96.2397	90.6155	1641	17	40.067	30.6	35.3335
132	Pierre_Exp6_11	64784	8517c_TRA_Data	06/11/2018	18.029	91	275	1.72	117	5153.85	0.0048	no	3.902	0.099	0.2786	0.0058	0.54372	3.58937	0.032	0.10102	0.00085	0.0837	0.0011	1614.8	21	1584	29	1645.8	9.9	1625	21	98.0926	96.245	1645.8	9.9	55.374	24.865	40.1195
133	Pierre_disco_16	116	8573c_TRA_Data	16/11/2018	18.584	94	1340	0.166642	125	50000	0.0015	no	4.066	0.076	0.2914	0.0082	0.29922	3.43171	0.056	0.1017	0.0018	0.066	0.0059	1646.9	15	1647	41	1650	30	1280	110	100.006	99.8182	1650	30	40.918	27.632	34.275
134	Pierre_exp1_10	6888	8506c_TRA_Data	06/11/2018	16.345	81	211	0.489573	40	19800	0.00023	no	4.281	0.066	0.2993	0.0046	0.78263	3.34113	0.045	0.10202	0.0015	0.082	0.0014	1689	13	1687	23	1659.7	16	1594	26	99.8816	101.645	1659.7	16	45.264	28.787	37.0255
135	Pierre_added_8	9	8567c_TRA_Data	14/11/2018	13.781	69	1939	0.168128	156	34615.4	-0.0007	no	4	0.093	0.2854	0.0094	0.39125	3.50385	0.068	0.1023	0.0018	0.0827	0.0058	1633.7	19	1617	47	1662	29	1600	110	98.9778	97.2924	1662	29	44.759	25.631	35.195
136	Pierre_disco_4	124	8574c_TRA_Data	16/11/2018	18.925	96	861	0.684088	103	37378.6	0.00069	no	3.946	0.069	0.2754	0.0049	0.40653	3.63108	0.02	0.10236	0.0013	0.081	0.0013	1622.9	14	1567.9	25	1665.6	11	1574	24	96.611	94.1342	1665.6	11	35.544	25.791	30.6675
137	Pierre_Exp5_2	41658	8514c_TRA_Data	06/11/2018	25.787	130	265	0.953585	73	8876.71	0.0049	no	3.806	0.079	0.2662	0.0046	0.8972	3.75657	0.052	0.10263	0.0019	0.0561	0.0035	1592	17	1521	23	1670.5	20	1101	67	95.5402	91.0506	1670.5	20	42.262	29.068	35.665
138	Pierre_Exp3_0	19940	8510c_TRA_Data	06/11/2018	18.92	96	192	1.12292	42	16595.2	0.00057	no	4.218	0.1	0.2981	0.0078	0.6764	3.35458	0.03	0.10262	0.0007	0.08657	0.0024	1676.9	20	1682	39	1671.3	7.2	1678	45	100.304	100.64	1671.3	7.2	51.928	28.367	40.1475
139	Pierre_Exp7_8	68138	8518c_TRA_Data	06/11/2018	9.4134	47	105.9	0.862134	44	5243.18	0.0117	no	4.11	0.16	0.2888	0.0096	0.60644	3.4626	0.091	0.1028	0.003	0.0975	0.0048	1652	33	1634	48	1674	34	1879	88	98.9104	97.6105	1674	34	42.877	31.663	37.27
140	Pierre_disco_8	154	8577c_TRA_Data	16/11/2018	25.206	127	431	0.430394	265	6445.28	0.0026	no	3.615	0.046	0.2549	0.0042	0.85151	3.92311	0.045	0.10293	0.00077	0.0591	0.0046	1551.5	10	1463	22	1676.7	8.1	1155	89	94.2958	87.2547	1676.7	8.1	44.299	32.881	38.59
141	Pierre_Exp4_9	36082	8513c_TRA_Data	06/11/2018	18.417	93	956	0.198013	158	16094.9	0.00336	no	3.672	0.12	0.2593	0.0067	0.92552	3.85654	0.064	0.10293	0.0013	0.0856	0.0015	1563	26	1485	34	1678.9	13	1659	28	95.0096	88.4508	1678.9	13	45.031	32.674	38.8525
142	Pierre_exp1_11	7036	8506c_TRA_Data	06/11/2018	16.212	82	179	0.664804	212	2948.11	0.0034	no	4.05	0.072	0.2813	0.0047	0.80463	3.55492	0.056	0.1032	0.0017	0.049	0.0061	1643	15	1597	24	1680	16	960	120	97.2002	95.0595	1680	16	48.224	26.815	37.5195
143	Pierre_Exp2_5	13860	8508c_TRA_Data	06/11/2018	24.729	125	272.7	0.817748	36	28222.2	0.0028	no	4.269	0.11	0.2997	0.0093	0.6492	3.33667	0.039	0.10316	0.0014	0.0849	0.0032	1687.5	22	1692	48	1680.1	14	1645	61	100.267	100.708	1680.1	14	72.292	29.95	51.121
144	Pierre_Exp4_13	37649	8513c_TRA_Data	06/11/2018	21.586	109	107.8	0.734972	49	5859.18	0.0097	no	3.81	0.12	0.2682	0.0065	0.63574	3.72856	0.05	0.1031	0.0016	0.0868	0.0013	1594	24	1531	33	1681	17	1683	24	96.0477	91.0767	1681	17	49.668	23.085	36.3765
145	Pierre_disco_10	156	8577c_TRA_Data	16/11/2018	5.6515	28	359	0.465181	260	5488.46	-0.0079	no	3.821	0.069	0.2689	0.0061	0.73	3.71886	0.071	0.1033	0.0014	0.0588	0.004	1596	15	1535	31	1683	15	1155	77	96.1779	91.2062	1683	15	36.163	24.259	30.211
146	Pierre_Exp8_4	74303	8520c_TRA_Data	06/11/2018	16.034	81	237.9	0.936108	1	611000	0.0036	no	4.109	0.057	0.2917	0.0041	0.78241	3.42818	0.043	0.10313	0.001	0.0923	0.0037	1655.3	11	1649	21	1683.5	11	1785	68	99.6194	97.9507	1683.5	11	43.45	28.329	35.8895
147	Pierre_Exp4_1	29224	8512c_TRA_Data	06/11/2018	15.064	76	1400	0.0656429	123	38455.3	-0.002	no	4.17	0.13	0.2939	0.0077	0.60233	3.40252	0.056	0.1035	0.0017	0.0682	0.0068	1667	25	1660	38	1685	27	1320	130	99.5801	98.5163	1685	27	42.991	31.457	37.224
148	Pierre_Exp8_9	75978	8521c_TRA_Data	06/11/2018	13.779	70	315	0.670476	11	72454.5	-0.0001	no	4.206	0.064	0.2964	0.0046	0.72411	3.37382	0.046	0.10342	0.0012	0.0892	0.0041	1674	13	1673	23	1685.2	12	1727	76	99.9403	99.2761	1685.2	12	48.519	32.381	40.45
149	Pierre_disco_5	105	8572c_TRA_Data	16/11/2018	7.6271	38	252	0.738095	98	11836.7	0.0022	no	4.253	0.11	0.2981	0.0089	0.6671	3.35458	0.066	0.1036	0.0019	0.0867	0.003	1683	21	1681	44	1686	17	1680	56	99.8812	99.7034	1686	17	43.095	26.591	34.843
150	Pierre_Exp2_6	14436	8508c_TRA_Data	06/11/2018	13.134	66	391	0.493606	33	41848.5	0.0005	no	4.311	0.12	0.2977	0.0094	0.75402	3.35909	0.041	0.10392	0.0015	0.0897	0.0018	1694	23	1679	46	1695	15	1735	32	99.1145	99.056	1695	15	44.417	37.368	40.8925
151	Pierre_Exp6_13	65094	8517c_TRA_Data	06/11/2018	17.327	87	2010	0.485572	179	23966.5	-0.0004	no	3.892	0.1	0.2702	0.0062	0.8364	3.70096	0.046	0.10396	0.00065	0.0451	0.0024	1611	22	1541	31	1695.5	7.6	891	46	95.6549	90.8876	1695.5	7.6	58.63	20.578	39.604
152	Pierre_disco_0	182	8580c_TRA_Data	16/11/2018	8.312	42	600.5	0.276436	27	89074.1	0.00034	no	4.099	0.048	0.2887	0.004	0.62188	3.4638	0.047	0.104	0.0013	0.0854	0.0039	1653.8	9.6	1635	20	1696.5	11	1655	72	98.8632	96.3749	1696.5	11	43.777	24.577	34.177
153	Pierre_Exp5_8	50956	8514c_TRA_Data	06/11/2018	16.231	82	173.1	0.722126	7	68000	0.001	no	4.493	0.11	0.3137	0.0067	0.57245	3.18776	0.062	0.1039	0.0021	0.0772	0.0036	1728	20	1757	33	1697	27	1501	68	101.678	103.536	1697	27	66.283	28.524	47.4035
154	Pierre_disco_2	120	8574c_TRA_Data	16/11/2018	12.653	64	510	0.270784	38	58526.3	-0.0072	no	4.026	0.08	0.2775	0.0057	0.7153	3.6036	0.043	0.10404	0.0015	0.0342	0.0021	1642.2	14	1578	29	1697.1	12	680	41	96.0906	92.9821	1697.1	12	36.18	27.767	31.9735
155	Pierre_Exp6_16	65521	8517c_TRA_Data	06/11/2018	14.782	75	1210	0.398347	77	38000	0.00038	no	4.298	0.11	0.297	0.0061	0.38726	3.367	0.025	0.10403	0.00081	0.0868	0.0011	1692.7	20	1676	30	1697.2	7.9	1682	20	99.0134	98.7509	1697.2	7.9	47.391	33.548	40.4695
156	Pierre_disco_13	136	8575c_TRA_Data	16/11/2018	12.466	63	756	0.104497	1	3590000	1.3e-05	no	4.346	0.087	0.2993	0.006	0.70101	3.34113	0.037	0.10411	0.0014	0.0831	0.0028	1701.6	16	1687	30	1698.2	14	1613	52	99.142	99.3405	1698.2	14	38.065	35.59	36.8275
157	Pierre_Exp8_13	80597	8521c_TRA_Data	06/11/2018	22.245	112	141.7	0.954128	32	10718.8	0	no	4.173	0.06	0.2829	0.004	0.72025	3.53482	0.044	0.10414	0.0011	0.079	0.0033	1667.7	12	1605	20	1698.3	11	1537	62	96.2403	94.5063	1698.3	11	49.872	26.109	37.9905
158	Pierre_disco_11	111	8573c_TRA_Data	16/11/2018	6.4997	33	232.3	0.462333	50	21440	0.0004	no	4.28	0.13	0.298	0.01	0.76472	3.3557	0.075	0.1041	0.002	0.084	0.0043	1687	25	1680	50	1699	19	1628	80	99.5851	98.8817	1699	19	65.288	24.573	44.9305
159	Pierre_exp1_1	2086	8506c_TRA_Data	06/11/2018	18.198	91	239.5	1.73695	147	6006.8	0.00148	no	4.509	0.086	0.3083	0.0055	0.86958	3.24359	0.056	0.10445	0.0015	0.0778	0.003	1730	16	1731	27	1702.9	14	1513	58	100.058	101.65	1702.9	14	55.629	25.829	40.729
160	Pierre_Exp4_14	38265	8513c_TRA_Data	06/11/2018	10.986	55	360.7	0.755198	73	11863	0.0044	no	3.677	0.11	0.2558	0.0063	0.6827	3.9093	0.057	0.1043	0.0016	0.0776	0.0014	1565.7	24	1468	32	1703	15	1511	26	93.76	86.2008	1703	15	59.866	34.578	47.222
161	Pierre_disco_2	184	8580c_TRA_Data	16/11/2018	11.192	56	291.3	1.38757	194	6087.63	0.0123	no	3.991	0.057	0.2806	0.0037	0.67835	3.56379	0.047	0.1042	0.0013	0.0882	0.0026	1632	12	1594	19	1703.6	11	1708	48	97.6716	93.5666	1703.6	11	39.301	32.559	35.93
162	Pierre_disco_12	194	8581c_TRA_Data	16/11/2018	18.035	90	1202	0.361065	110	44000	-0.011	no	4.165	0.042	0.2884	0.0029	0.25166	3.46741	0.034	0.1049	0.0013	0.0592	0.0026	1666.7	8.4	1633	14	1706	22	1162	50	97.978	95.721	1706	22	36.559	25.841	31.2
163	Pierre_added_10	11	8568c_TRA_Data	14/11/2018	18.253	92	1118	0.204293	149	20402.7	-0.0016	no	3.921	0.091	0.2723	0.0075	0.45492	3.67242	0.035	0.1048	0.0011	0.0742	0.0036	1617.6	19	1552	38	1707	11	1445	68	95.9446	90.9197	1707	11	43.522	25.218	34.37
164	Pierre_exp1_4	3025	8506c_TRA_Data	06/11/2018	18.015	91	502.1	0.170484	82	22890.2	0.00013	no	4.382	0.053	0.3024	0.0035	0.58565	3.30688	0.03	0.10458	0.0014	0.0849	0.0017	1708.4	9.8	1703	17	1707.2	14	1647	32	99.6839	99.754	1707.2	14	48.118	28.112	38.115
165	Pierre_disco_3	122	8574c_TRA_Data	16/11/2018	26.538	134	701	0.160913	171	19707.6	-0.0014	no	4.273	0.078	0.2918	0.0054	0.75486	3.427	0.026	0.10468	0.0013	0.0549	0.0025	1687.6	15	1650	27	1708.3	13	1079	48	97.772	96.5873	1708.3	13	36.596	21.049	28.8225
166	Pierre_Exp8_11	79828	8521c_TRA_Data	06/11/2018	5.7612	29	206	0.898058	97	4938.14	0.0101	no	4.38	0.16	0.304	0.012	0.65799	3.28947	0.13	0.1036	0.0027	0.0973	0.0058	1706	29	1709	58	1715	40	1875	110	100.176	99.6501	1715	40	48.645	32.249	40.447
167	Pierre_Exp3_3	22897	8510c_TRA_Data	06/11/2018	6.9843	35	1280	0.504687	140	26142.9	0.0043	no	3.703	0.093	0.2546	0.0067	0.37096	3.92773	0.037	0.1051	0.0011	0.0786	0.0026	1571.7	20	1462	34	1716	11	1529	48	93.0203	85.1981	1716	11	77.862	25.193	51.5275
168	Pierre_Exp8_14	81666	8521c_TRA_Data	06/11/2018	10.164	51	1180	0.372034	320	6812.5	0.0114	no	3.79	0.12	0.2551	0.0085	0.8472	3.92003	0.12	0.1052	0.0015	0.0439	0.0045	1586	26	1463	43	1716	20	867	87	92.2446	85.2564	1716	20	51.84	22.39	37.115
169	Pierre_Exp5_4	43362	8514c_TRA_Data	06/11/2018	7.4622	37	497	0.380483	50	27120	-0.00012	no	4.559	0.1	0.3101	0.0066	0.741	3.22477	0.06	0.1053	0.0022	0.0849	0.003	1741	19	1741	33	1717	25	1646	55	100	101.398	1717	25	40.868	33.123	36.9955
170	Pierre_disco_11	158	8577c_TRA_Data	16/11/2018	17.438	88	1033	0.131655	163	26932.5	-0.00034	no	4.374	0.045	0.3014	0.0047	0.69919	3.31785	0.033	0.10561	0.0009	0.0695	0.0028	1706.9	8.6	1698	23	1724.5	9.4	1357	54	99.4786	98.4633	1724.5	9.4	43.423	25.422	34.4225
171	Pierre_Exp6_6	63836	8516c_TRA_Data	06/11/2018	28.131	139	309	0.499676	21	36333.3	0.00118	no	4.367	0.11	0.3005	0.0063	0.77219	3.32779	0.031	0.10554	0.00063	0.0892	0.0012	1705.3	21	1693	31	1724.7	6	1730	23	99.2787	98.162	1724.7	6	36.823	29.49	33.1565
172	Pierre_Exp5_1	41645	8514c_TRA_Data	06/11/2018	28.302	143	820	0.273171	96	24416.7	9e-05	no	4.67	0.088	0.3157	0.0047	0.84124	3.16756	0.033	0.10613	0.0019	0.0739	0.0029	1760.5	16	1768	23	1734.5	19	1440	55	100.426	101.931	1734.5	19	64.95	23.19	44.07
173	Pierre_Exp7_11	68706	8519c_TRA_Data	06/11/2018	7.6118	37	301	0.58206	13	54230.8	0.0008	no	4.493	0.14	0.3071	0.0077	0.66637	3.25627	0.048	0.1061	0.002	0.0865	0.0032	1729	26	1726	38	1735	19	1676	59	99.8265	99.4813	1735	19	52.704	33.553	43.1285
174	Pierre_Exp5_15	61086	8515c_TRA_Data	06/11/2018	9.7167	49	308	0.977273	22	37954.5	0.0005	no	4.423	0.084	0.3055	0.0053	0.39382	3.27332	0.045	0.1067	0.0023	0.0828	0.0032	1718.3	17	1718	26	1736	18	1607	60	99.9825	98.9631	1736	18	45.153	31.781	38.467
175	Pierre_Exp5_14	61046	8515c_TRA_Data	06/11/2018	15.368	77	473	1.04651	140	8357.14	-0.006	no	3.832	0.073	0.2651	0.004	0.74307	3.77216	0.039	0.10627	0.002	0.0734	0.0019	1598.9	15	1515	21	1738	16	1431	36	94.7526	87.1692	1738	16	55.108	38.01	46.559
176	Pierre_disco_7	153	8577c_TRA_Data	16/11/2018	18.365	92	756	0.525132	128	24453.1	-0.0015	no	4.117	0.036	0.2806	0.0042	0.69792	3.56379	0.031	0.10663	0.00078	0.0777	0.0032	1657.2	7.2	1596	22	1739	8.2	1512	61	96.307	91.7769	1739	8.2	39.021	25.027	32.024
177	Pierre_Exp8_1	73244	8520c_TRA_Data	06/11/2018	5.2996	27	412	0.563107	40	23250	0.0004	no	4.463	0.088	0.3093	0.007	0.64557	3.23311	0.069	0.1066	0.002	0.0854	0.0045	1723	16	1737	34	1739	21	1655	84	100.813	99.885	1739	21	39.993	35.352	37.6725
178	Pierre_disco_15	115	8573c_TRA_Data	16/11/2018	19.218	97	523	0.19044	53	49056.6	0.00037	no	4.532	0.082	0.3084	0.0076	0.68411	3.24254	0.032	0.10674	0.0012	0.0886	0.0027	1736.4	15	1732	38	1740.6	12	1715	51	99.7466	99.5059	1740.6	12	29.383	27.126	28.2545
179	Pierre_Exp10_11	68429	8524c_TRA_Data	06/11/2018	10.989	56	481	0.337006	46	28434.8	-3e-05	no	4.662	0.13	0.3144	0.0088	0.76224	3.18066	0.039	0.10672	0.0017	0.0881	0.0042	1760	24	1762	43	1741.3	14	1707	79	100.114	101.189	1741.3	14	50.304	31.212	40.758
180	Pierre_disco_5	187	8580c_TRA_Data	16/11/2018	13.178	67	757	0.265522	41	85609.8	0.00066	no	4.427	0.048	0.3024	0.0033	0.56345	3.30688	0.036	0.1068	0.0012	0.0948	0.003	1716.9	8.9	1703	16	1746.2	11	1831	56	99.1904	97.5261	1746.2	11	50.284	38.159	44.2215
181	Pierre_Exp3_15	27919	8511c_TRA_Data	06/11/2018	18.035	91	723	0.515906	76	34565.8	0.00043	no	4.534	0.11	0.3073	0.0079	0.47881	3.25415	0.026	0.10712	0.00082	0.0892	0.0025	1736.8	20	1727	39	1751	8.2	1726	47	99.4357	98.6294	1751	8.2	47.315	35.286	41.3005
182	Pierre_Exp7_1	65949	8518c_TRA_Data	06/11/2018	9.857	50	1940	0.0612887	86	50232.6	-0.00096	no	4.206	0.12	0.2818	0.0067	0.65383	3.54862	0.043	0.1073	0.0018	0.0722	0.0064	1674.8	23	1600	34	1753	18	1410	120	95.5338	91.2721	1753	18	53.307	28.487	40.897
183	Pierre_Exp4_8	35431	8513c_TRA_Data	06/11/2018	18.301	92	1385	0.612274	29	153103	0.00055	no	4.568	0.13	0.3098	0.0068	0.66946	3.22789	0.028	0.10729	0.0014	0.091	0.0014	1742.9	24	1739	33	1753.3	13	1760	25	99.7762	99.1844	1753.3	13	46.813	31.454	39.1335
184	Pierre_Exp2_12	16863	8509c_TRA_Data	06/11/2018	8.7612	45	471	0.713376	74	22108.1	-3.5e-05	no	4.814	0.12	0.3187	0.0099	0.35351	3.13775	0.036	0.1073	0.0016	0.0894	0.002	1787	20	1783	49	1755	16	1730	36	99.7762	101.595	1755	16	51.291	26.51	38.9005
185	Pierre_disco_4	186	8580c_TRA_Data	16/11/2018	9.0175	45	250.9	0.414508	200	5545	0.00031	no	4.56	0.11	0.3108	0.0073	0.83311	3.2175	0.077	0.1076	0.0016	0.0906	0.0031	1739	20	1743	36	1759	14	1753	58	100.23	99.0904	1759	14	40.213	28.528	34.3705
186	Pierre_disco_6	127	8574c_TRA_Data	16/11/2018	12.736	64	766	0.283943	280	12750	-0.003	no	4.31	0.1	0.2942	0.0065	0.81011	3.39905	0.048	0.1076	0.0015	0.0683	0.0072	1694	19	1662	32	1760	14	1330	140	98.111	94.4318	1760	14	50.726	31.174	40.95
187	Pierre_disco_14	163	8577c_TRA_Data	16/11/2018	7.1183	36	923	0.201517	220	17909.1	-0.00032	no	4.698	0.083	0.3184	0.0071	0.7682	3.1407	0.061	0.1079	0.0012	0.0835	0.0054	1766	15	1781	35	1760	13	1619	100	100.849	101.193	1760	13	42.629	28.942	35.7855
188	Pierre_disco_4	104	8572c_TRA_Data	16/11/2018	4.4219	22	812	0.309113	1060	3245.28	-0.0141	no	4.193	0.096	0.2813	0.0081	0.7058	3.55492	0.066	0.1085	0.0017	0.0515	0.0021	1672	19	1598	41	1773	17	1016	41	95.5742	90.1297	1773	17	30.791	24.728	27.7595
189	Pierre_Exp7_9	68353	8518c_TRA_Data	06/11/2018	19.863	100	36.8	0.625543	7	13514.3	0.0033	no	4.931	0.16	0.3239	0.0087	0.65073	3.08737	0.056	0.1103	0.0022	0.1003	0.0045	1807	28	1807	42	1797	24	1931	82	100	100.556	1797	24	60.526	38.323	49.4245
190	Pierre_disco_2	145	8576c_TRA_Data	16/11/2018	8.9782	45	264.3	0.154219	440	6415.91	0.00061	no	4.789	0.049	0.3157	0.0052	0.4196	3.16756	0.036	0.1102	0.0012	0.0972	0.0043	1782.8	8.7	1768	25	1800	13	1875	78	99.1698	98.2222	1800	13	31.535	25.76	28.6475
191	Pierre_exp1_9	6830	8506c_TRA_Data	06/11/2018	18.498	93	585	0.364103	540	4388.89	0.00106	no	4.878	0.081	0.3185	0.0036	0.37632	3.13972	0.028	0.1103	0.0019	0.0866	0.0024	1797	14	1782	17	1802	27	1677	44	99.1653	98.8901	1802	27	48.663	31.428	40.0455
192	Pierre_Exp8_3	73409	8520c_TRA_Data	06/11/2018	3.8383	20	405	0.311111	30	30966.7	0.00097	no	4.62	0.12	0.3083	0.0071	0.79748	3.24359	0.07	0.1107	0.0018	0.0844	0.0072	1753	22	1732	35	1810	19	1640	130	98.8021	95.6906	1810	19	44.541	34.505	39.523
193	Pierre_exp1_14	8411-1	8507c_TRA_Data	06/11/2018	9.5639	49	502	1.44422	143	12797.2	0.0108	no	4.751	0.074	0.2975	0.0046	0.68391	3.36135	0.046	0.1128	0.0018	0.057	0.003	1778	14	1678	23	1844	20	1119	58	94.3757	90.9978	1844	20	31.382	18.026	24.704
194	Pierre_Exp2_7	14649	8509c_TRA_Data	06/11/2018	5.1802	26	388	0.96701	40	34750	0.004	no	5.22	0.15	0.3209	0.011	0.44746	3.11624	0.051	0.1137	0.0022	0.0973	0.004	1856	25	1794	52	1857	18	1876	74	96.6595	96.6074	1857	18	48.282	32.085	40.1835
195	Pierre_added_5	6	8567c_TRA_Data	14/11/2018	24.924	120	89	0.582022	18	16777.8	-0.0007	no	5.56	0.16	0.3537	0.012	0.86017	2.82726	0.069	0.1139	0.0014	0.08	0.0029	1908	25	1949	58	1860	15	1554	54	102.149	104.785	1860	15	39.744	24.187	31.9655
196	Pierre_Exp7_13	69023	8519c_TRA_Data	06/11/2018	10.91	55	523	0.978967	760	1484.21	0.0073	no	4.44	0.18	0.2833	0.009	0.62278	3.52983	0.087	0.114	0.0029	0.0752	0.0055	1721	36	1607	45	1881	49	1462	100	93.3759	85.4333	1881	49	59.807	31.512	45.6595
197	Pierre_disco_13	195	8581c_TRA_Data	16/11/2018	12.696	64	113	1.38938	383	1135.77	0.0171	no	4.8	0.12	0.2969	0.0064	0.86489	3.36814	0.073	0.1175	0.0016	0.045	0.0021	1783	20	1675	32	1916	16	890	40	93.9428	87.4217	1916	16	67.66	22.657	45.1585
198	Pierre_disco_7	189	8580c_TRA_Data	16/11/2018	9.4844	48	540	0.881481	252	10111.1	-0.0071	no	5.089	0.073	0.3101	0.004	0.879	3.22477	0.042	0.11932	0.0011	0.0578	0.0022	1833	12	1741	20	1948.5	10	1136	43	94.9809	89.3508	1948.5	10	32.306	21.913	27.1095
199	Pierre_Exp8_8	75507	8520c_TRA_Data	06/11/2018	23.315	115	160	0.4525	62	9387.1	-0.0029	no	9.08	0.25	0.435	0.011	0.92327	2.29885	0.058	0.1522	0.0017	0.108	0.0054	2338	25	2324	49	2366	16	2070	98	99.4012	98.2249	2366	16	49.443	35.647	42.545
200	Pierre_disco_10	110	8572c_TRA_Data	16/11/2018	19.578	99	571	0.420315	250	17240	0.00273	no	10.88	0.2	0.4423	0.011	0.6857	2.26091	0.018	0.17725	0.0018	0.1291	0.0034	2513.4	16	2361	48	2633.5	14	2454	61	93.9365	89.6526	2633.5	14	39.75	28.316	34.033
	Discordant Analyses (More than +5 to -10% '68/75' discordance for <1100Ma '6/8' age; +5 to -15% '68/76' discordance for ≥1100Ma '7/6' age)
201	Pierre_Exp9_16	298337	8523c_TRA_Data	06/11/2018	15.555	78	1330	1.5188	168	7619.05	0.0301	no	1.439	0.043	0.1267	0.0075	0.93877	7.89266	0.17	0.08027	0.0011	0.0416	0.0025	906	17	768	43	1203.3	14	823	49	84.7682	63.8245	1203.3	14	46.477	27.591	37.034
202	Pierre_Exp4_10	36268	8513c_TRA_Data	06/11/2018	8.2428	42	887	0.48929	40	46825	0.0091	yes	2.757	0.12	0.2148	0.006	0.78786	4.67	0.086	0.0934	0.0022	0.0638	0.0014	1342	34	1254	32	1490	45	1250	27	93.4426	84.1611	1490	45	70.527	37.809	54.168
203	Pierre_exp1_6	3477	8506c_TRA_Data	06/11/2018	16.351	82	450	0.453556	208	6389.42	0.009	no	3.423	0.045	0.2376	0.0034	0.56605	4.20875	0.052	0.1031	0.0016	0.0584	0.004	1509	10	1374	18	1680.1	14	1144	77	91.0537	81.7808	1680.1	14	44.349	33.245	38.797
204	Pierre_Exp2_0	10026	8508c_TRA_Data	06/11/2018	19.783	98	898	0.152561	84	33309.5	0.0011	yes	3.509	0.13	0.2453	0.0078	0.68707	4.086	0.04	0.1031	0.0023	0.07155	0.00067	1528	29	1414	41	1684	39	1397	13	92.5393	83.9667	1684	39	50.777	23.066	36.9215
205	Pierre_Exp2_4	13762	8508c_TRA_Data	06/11/2018	10.275	52	265	1.36226	274	2737.23	0.0204	no	3.333	0.093	0.2336	0.008	0.82498	4.28082	0.079	0.1043	0.0016	0.01734	0.00095	1488	22	1353	42	1701	15	347	19	90.9274	79.5414	1701	15	61.518	29.632	45.575
206	Pierre_disco_16	165	8577c_TRA_Data	16/11/2018	18.303	89	730	0.282329	540	4470.37	0.0152	no	3.207	0.05	0.221	0.0041	0.70038	4.52489	0.063	0.105	0.0011	0.0501	0.0037	1457	12	1287	22	1715	16	986	71	88.3322	75.0437	1715	16	34.765	24.685	29.725
207	Pierre_disco_2	102	8572c_TRA_Data	16/11/2018	9.8668	50	710	0.174648	1640	1969.51	-0.0024	no	3.895	0.081	0.255	0.0062	0.17563	3.92157	0.034	0.1104	0.0017	0.0347	0.0042	1612	17	1464	32	1805	26	688	81	90.8189	81.108	1805	26	43	24	33.5
208	Pierre_disco_3	103	8572c_TRA_Data	16/11/2018	10.482	53	804	0.430348	1310	3511.45	0.0013	no	8.009	0.16	0.3602	0.0091	0.7496	2.77623	0.031	0.162	0.0019	0.0932	0.0044	2231	18	1983	43	2477.4	11	1799	81	88.8839	80.0436	2477.4	11	41	24	32.5
209	Pierre_Exp3_6	24171	8510c_TRA_Data	06/11/2018	11.785	57	620	2.69677	380	9431.58	0.0067	no	11.66	0.31	0.4366	0.012	0.85683	2.29043	0.027	0.1933	0.0015	0.1203	0.0039	2577	25	2335	53	2771.7	9	2296	70	90.6092	84.2443	2771.7	9	81.837	54.086	67.9615
	Notes
	1 Calibration standard: 91500m zircon (U=80 ppm, Th=30 ppm) (Wiedenbeck et al., 2004)
	2 Common Pb correction made using the method of Andersen (2002), as calculated by Iolite v.3.6
	3 Data corrected for background, drift and downhole U/Pb fractionation using Iolite v.3.6 and 91500 zircon as calibration standard
	4 Uncertainties Uncertainties quoted are Iolite output of 2SE for isotopic ratios, either as internal error only and expressed as 2sint for age or propagated random errors (Internal error + Calculated excess uncertainity) and expressed as 2sprop for age (Paton et al., 2010)
	5 Dates calculated using the decay constants of Jaffey et al. (1971)
	6 Concordence calculated as (206Pb-238U age/207Pb-235U age)*100
	7 Concordance calculated as (206Pb-238U age/207Pb-206Pb age)*100
	8 If zircon age <1100Ma, preferred age is 206Pb-238U age with concordance as 90%-105%; if zircon age ≥1100Ma, Preferred age is 207Pb-206Pb age with concordance as 85%-105%.

## Sheet: Pierre Sh Thin Sections
	Table S5. U-Pb Isotope Data for Detrital Zircon, Pierre Shale Thin Sections, Raton Basin																																	Sylvester, Souders, Liu Geology G49684
	Mineral Isotope Laser Laboratory (MILL), Texas Tech University, 12 µm spots, 4.25 J/cm2, 30 sec total ablation, 8Hz, 240 shots										Andersen (2002) Correction		U-Pb Data for Wetherill plot3					U-Pb Data for Tera-Wasserburg plot3				Th-Pb Data3		Dates (Ma)5								206Pb/238U-207Pb/235U	206Pb/238U-207Pb/206Pb			Grain dimensions
Count	File sequence	Grain-Analysis Number	Source file	Date	Duration (s)	Points	U ppm1	Th/U1	204Pb cps	206Pb/204Pb	Corrected2 Final Fraction Common Pb	Correction Used	207Pb/235U	2sprop4	206Pb/238U	2sprop4	Error Correlation Rho	238U/206Pb	2sint4	207Pb/206Pb	2sprop4	208Pb/232Th	2sprop4	207Pb/235U	2sprop4	206Pb/238U	2sprop4	207Pb/206Pb	2sprop4	208Pb/232Th	2sprop4	% Conc6	% Conc7	Preferred Age8	2sprop4	Length (mm)	Width (mm)	[Length + Width]/2
1	LPieBul1_6	47_1	9341c_TRA_Data	20/02/2019	5.9684	30	298	1.32215	680	32.9412	0.052	yes	0.0663	0.0021	0.01043	0.00034	0.99996	96.5	3.1	0.0460947	7.7e-06	0.00313	0.00026	65.2	2	66.9	2.2	2.58	0.4	63.2	5.2	102.607	2593.02	66.9	2.2	26.698	22.01	24.354
2	LPieBul1_13	34_1	9340c_TRA_Data	20/02/2019	11.537	58	381	0.566142	1110	29.036	0.0015	no	0.0708	0.003	0.01067	0.00017	0.40924	93.7207	1.6	0.0477	0.0018	0.00343	0.00016	69.4	2.8	68.4	1.1	175	38	69.2	3.1	98.5591	39.0857	68.4	1.1	31.565	28.636	30.1005
3	LPieBul2017Exp2_2	14_2017	9354c_TRA_Data	21/02/2019	7.6677	39	537	0.608939	313	117.891	0.0129	yes	0.0691	0.0014	0.01073	0.00016	0.81381	93.1	1.5	0.046158	6e-05	0.00336	0.00022	67.8	1.3	68.8	1	5.8	3.1	67.8	4.4	101.475	1186.21	68.8	1	27.765	15.613	21.689
4	LPieBul1_5	65_1	9342c_TRA_Data	20/02/2019	7.2137	37	489	1.8364	680	50	0.0191	yes	0.0692	0.0015	0.01086	0.0004	0.98254	92.5	2.1	0.046131	3.8e-05	0.0034	0.00015	68	1.4	69.6	2.5	4.5	2	68.7	3.1	102.353	1546.67	69.6	2.5	26.234	15.812	21.023
5	LPieBul1LPieBul2_5	83_1	9343c_TRA_Data	20/02/2019	9.0993	46	1560	1.63462	620	167.742	0.04	yes	0.0692	0.0014	0.01088	0.00023	0.994	92.3	1.7	0.0460861	3.9e-06	0.0028	0.00013	68	1.3	69.8	1.4	2.12	0.2	56.4	2.6	102.647	3292.45	69.8	1.4	27.305	19.354	23.3295
6	LPieBul1LPieBul2_6	84_1	9343c_TRA_Data	20/02/2019	5.7915	29	544	1.13971	1060	34.3396	0.0326	yes	0.0697	0.0019	0.01094	0.00033	0.99472	91.8	2.3	0.046142	6.4e-05	0.00325	0.00019	68.4	1.8	70.1	2.1	5	3.3	65.7	3.8	102.485	1402	70.1	2.1	26.412	21.39	23.901
7	LPieBul2Exp3_10	35_2	9349c_TRA_Data	21/02/2019	10.86	54	418	0.851675	263	135.513	0.0026	no	0.0728	0.003	0.01098	0.0002	0.2258	91.0747	1.4	0.0481	0.002	0.00338	0.00011	71.3	2.9	70.4	1.3	215	53	68.2	2.1	98.7377	32.7442	70.4	1.3	31.399	21.422	26.4105
8	LPieBul1_13	57_1	9341c_TRA_Data	20/02/2019	22.258	112	256	1.44531	336	65.744	0.0025	no	0.0733	0.0025	0.01107	0.00018	0.12763	90.3342	1.3	0.0483	0.0016	0.0038	0.00015	71.8	2.4	70.97	1.2	256	40	76.7	3	98.844	27.7227	70.97	1.2	47.014	17.284	32.149
9	LPieBul2Exp4_6	48-2	9351c_TRA_Data	21/02/2019	11.834	60	152.3	1.13657	230	58.087	-0.0001	no	0.0712	0.0038	0.0111	0.00028	0.037656	90.0901	2	0.0466	0.0028	0.00309	0.00015	69.7	3.6	71.2	1.8	164	46	62.3	3.1	102.152	43.4146	71.2	1.8	25.264	17.873	21.5685
10	LPieBul1_13	74_1	9342c_TRA_Data	20/02/2019	8.0871	40	206.7	0.274794	870	16.7931	0.0051	no	0.076	0.005	0.01113	0.00041	0.41735	89.8473	1.7	0.0499	0.0031	0.00385	0.00045	74.3	4.7	71.3	2.6	296	66	77.6	9	95.9623	24.0878	71.3	2.6	24.259	15.442	19.8505
11	LPieBul2Exp3_0	25_2	9349c_TRA_Data	21/02/2019	17.126	86	284	1.27113	353	72.238	0.0035	no	0.0747	0.0026	0.01115	0.00018	0.20927	89.6861	1.1	0.0489	0.0017	0.003525	9.8e-05	73.5	2.6	71.47	1.1	246	38	71.1	2	97.2381	29.0528	71.47	1.1	28.243	25.584	26.9135
12	LPieBul2017Exp2_13	26_2017	9354c_TRA_Data	21/02/2019	5.4113	28	496	0.881048	400	96.75	0.0365	yes	0.071	0.0017	0.01117	0.00026	0.99997	89.9	2.1	0.0460882	7.4e-06	0.00303	0.00027	69.6	1.6	71.6	1.7	2.23	0.39	61.1	5.4	102.874	3210.76	71.6	1.7	19.847	16.941	18.394
13	LPieBul1_12	33_1	9340c_TRA_Data	20/02/2019	4.7924	24	738	0.859079	700	80.8571	0.0005	no	0.072	0.0044	0.01122	0.00024	0.4062	89.1266	2	0.0475	0.0026	0.00382	0.00016	70.5	4.1	71.9	1.5	168	77	77.1	3.3	101.986	42.7976	71.9	1.5	30	24	27
14	LPieBul2Exp4_4	46_2	9351c_TRA_Data	21/02/2019	19.036	96	407	0.756757	261	141.379	0.0029	no	0.0741	0.0021	0.01121	0.00026	0.44743	89.2061	1.6	0.0486	0.0017	0.00349	0.00016	72.9	2.1	71.9	1.6	195	42	70.3	3.3	98.6283	36.8718	71.9	1.6	40.981	19.1	30.0405
15	LPieBul1_5	6_1	9334c_TRA_Data	20/02/2019	8.1199	41	202.4	0.668972	260	67.1538	0.0127	yes	0.0725	0.0031	0.01127	0.00053	0.90047	89.7	3	0.046117	4.7e-05	0.0037	0.00029	71	2.9	72.2	3.4	3.7	2.4	75.9	5.3	101.69	1951.35	72.2	3.4	32	29	30.5
16	LPieBul2017Exp1_3	62_2	9352c_TRA_Data	21/02/2019	7.7683	39	194	0.762887	210	76	0.0027	no	0.0748	0.0086	0.01129	0.00031	0.21	88.574	2.5	0.0489	0.0063	0.00277	0.00026	73	8	72.4	2	710	380	55.9	5.2	99.1781	10.1972	72.4	2	39.108	13.544	26.326
17	LPieBul2_2	10_2	9344c_TRA_Data	20/02/2019	16.464	83	1844	1.36117	380	401.579	0.0037	no	0.0768	0.0013	0.01131	0.0001	0.39904	88.4173	0.81	0.04907	0.00084	0.003486	9.6e-05	75.1	1.2	72.53	0.66	161	21	70.3	1.9	96.5779	45.0497	72.53	0.66	29.611	25.536	27.5735
18	LPieBul2017Exp1_9	4_2017	9352c_TRA_Data	21/02/2019	8.0811	41	106.1	1.19887	78	97.3077	0.0381	yes	0.0725	0.0029	0.01138	0.00037	0.99818	88	3.2	0.046117	6.4e-05	0.00369	0.00051	71.1	2.8	73	2.4	3.7	3.3	74.5	10	102.672	1972.97	73	2.4	58	19	38.5
19	LPieBul1_3	4_1	9334c_TRA_Data	20/02/2019	8.02	40	854	4.56674	310	238.71	0.0012	no	0.0748	0.0037	0.01147	0.00044	0.44484	87.184	1.7	0.047	0.0017	0.003061	0.00011	73.2	3.5	73.5	2.8	113	37	61.8	2.3	100.41	65.0442	73.5	2.8	55.825	22.599	39.212
20	LPieBul2017Exp3_8	38_2017	9356c_TRA_Data	21/02/2019	25.892	127	423	0.739953	196	171.429	0.0038	no	0.0778	0.0048	0.01153	0.00024	0.41222	86.7303	1.7	0.0492	0.0032	0.00394	0.00056	76	4.5	73.9	1.5	249	46	79.5	11	97.2368	29.6787	73.9	1.5	35.027	22.1	28.5635
21	LPieBul1_8	9_1	9334c_TRA_Data	20/02/2019	9.3888	47	302	0.910596	320	80.3125	0.0034	no	0.0767	0.0041	0.01152	0.00047	0.10981	86.8056	2	0.0485	0.0025	0.00352	0.00015	75.6	4.2	73.9	3	236	80	71.1	3	97.7513	31.3136	73.9	3	35.636	29.026	32.331
22	LPieBul1_14	36_1	9340c_TRA_Data	20/02/2019	5.7827	29	1351	0.876388	630	168.095	0.0028	no	0.0774	0.0028	0.01153	0.00019	0.29175	86.7303	1.2	0.0497	0.0017	0.00386	0.00013	75.7	2.6	73.9	1.2	187	40	77.9	2.6	97.6222	39.5187	73.9	1.2	33.034	27.471	30.2525
23	LPieBul1_0	39_1	9341c_TRA_Data	20/02/2019	9.6305	49	2260	1.40265	1210	154.545	0.023	yes	0.0735	0.0011	0.01157	0.00022	0.99963	86.7	1.2	0.0460874	3e-06	0.003035	0.00012	72	1	74.1	1.4	2.19	0.16	61.3	2.3	102.917	3383.56	74.1	1.4	59.257	20.629	39.943
24	LPieBul2_16	24_2	9344c_TRA_Data	20/02/2019	12.823	64	177.8	0.818898	400	37.35	0.0015	no	0.0751	0.0039	0.01158	0.00023	0.053642	86.3558	1.8	0.0476	0.0028	0.00342	0.00019	73.5	3.6	74.2	1.5	261	78	69.1	3.8	100.952	28.4291	74.2	1.5	61.077	11.93	36.5035
25	LPieBul1_4	64_1	9342c_TRA_Data	20/02/2019	26.36	132	225	0.751111	813	22.1402	0.0051	no	0.0803	0.0032	0.01161	0.00041	0.22279	86.1326	1.3	0.0498	0.002	0.00405	0.0002	78.3	3	74.4	2.6	337	51	81.6	4	95.0192	22.0772	74.4	2.6	33.011	23.911	28.461
26	LPieBul1_2	42_1	9341c_TRA_Data	20/02/2019	8.0653	41	85.3	1.39273	1020	6.78431	0.0073	no	0.0816	0.0088	0.01163	0.00053	0.10199	85.9845	3.9	0.0511	0.006	0.00368	0.00022	79.3	8.3	74.5	3.4	580	150	74.2	4.5	93.947	12.8448	74.5	3.4	32.962	17.988	25.475
27	LPieBul2Exp3_5	30_2	9349c_TRA_Data	21/02/2019	16.117	81	151	0.84106	381	36.8766	0.0045	no	0.0787	0.0045	0.01163	0.00026	0.47734	85.9845	1.7	0.0489	0.0025	0.00363	0.00016	76.8	4.2	74.5	1.6	291	55	73.2	3.2	97.0052	25.6014	74.5	1.6	29.482	19.705	24.5935
28	LPieBul1_2	3_1	9334c_TRA_Data	20/02/2019	5.6899	28	358	0.639665	320	100.312	0.0048	no	0.0809	0.0051	0.01164	0.00045	0.33636	85.9107	1.7	0.0501	0.0027	0.00417	0.00035	78.9	4.8	74.6	2.9	236	44	84.1	7	94.5501	31.6102	74.6	2.9	36.756	20.582	28.669
29	LPieBul1_11	32_1	9340c_TRA_Data	20/02/2019	6.8949	34	378	0.31746	450	66.4444	0.0001	no	0.0747	0.0041	0.01167	0.0003	0.27764	85.6898	1.9	0.0472	0.0026	0.00377	0.00032	73	3.9	74.8	1.9	172	62	76.1	6.5	102.466	43.4884	74.8	1.9	38.588	20.536	29.562
30	LPieBul1LPieBul2_10	1_2	9343c_TRA_Data	20/02/2019	19.018	95	651	0.889401	138	370.29	0.0024	no	0.0769	0.0021	0.01168	0.00022	0.1771	85.6164	0.88	0.0482	0.0012	0.003718	0.00014	75.2	1.9	74.85	1.4	194	29	75	2.8	99.5346	38.5825	74.85	1.4	41.393	18.471	29.932
31	LPieBul1_0	19_1	9340c_TRA_Data	20/02/2019	12.282	62	142	0.969718	860	14	0.0012	no	0.076	0.0044	0.01169	0.00026	-0.0004538	85.5432	1.9	0.0474	0.0029	0.00376	0.00018	74.3	4.1	74.9	1.6	272	54	75.8	3.7	100.808	27.5368	74.9	1.6	40.597	25.366	32.9815
32	LPieBul2_1	9_2	9344c_TRA_Data	20/02/2019	17.629	88	477	0.314465	200	200.5	0.0032	no	0.0791	0.0021	0.01175	0.00017	0.36979	85.1064	1.2	0.0487	0.0012	0.0039	0.00023	77.3	2	75.3	1.1	206	31	78.7	4.7	97.4127	36.5534	75.3	1.1	28.416	24.51	26.463
33	LPieBul1_7	8_1	9334c_TRA_Data	20/02/2019	7.5799	39	672	0.403274	270	222.222	0.0044	no	0.0797	0.0041	0.01178	0.00042	0.026273	84.8896	1.2	0.0486	0.0021	0.00357	0.00021	77.8	3.9	75.5	2.7	201	44	71.9	4.3	97.0437	37.5622	75.5	2.7	55.63	19.41	37.52
34	LPieBul2Exp3_12	37_2	9349c_TRA_Data	21/02/2019	20.828	104	286	1.62238	313	86.5815	0.0028	no	0.0814	0.0043	0.01225	0.00045	0.59711	81.6326	2.8	0.048	0.0019	0.00377	0.00022	79.9	4.1	78.4	2.9	211	39	76	4.4	98.1227	37.1564	78.4	2.9	32	19.6	25.8
35	LPieBul2017Exp1_4	63_2	9352c_TRA_Data	21/02/2019	8.0592	40	85.5	1.03626	400	19.75	0.0013	no	0.0782	0.0066	0.01225	0.00046	0.09	81.6326	3.1	0.0474	0.0047	0.00279	0.00032	76.3	6.2	78.5	2.9	325	90	56.3	6.4	102.883	24.1538	78.5	2.9	67.978	30.422	49.2
36	LPieBul2Exp3_4	29_2	9349c_TRA_Data	21/02/2019	12.844	64	207	1.21739	313	60.0639	0.0045	no	0.0852	0.0048	0.01238	0.00041	0.21961	80.7754	2.4	0.05	0.0028	0.00448	0.00022	82.9	4.5	79.3	2.6	310	48	90.4	4.4	95.6574	25.5806	79.3	2.6	35.325	21.169	28.247
37	LPieBul2017Exp1_7	2_2017	9352c_TRA_Data	21/02/2019	17.729	89	279	3.01075	221	106.787	0.002	no	0.079	0.006	0.0124	0.00031	0.24172	80.6452	2	0.0481	0.0046	0.00418	0.00046	76.9	5.5	79.4	2	290	160	84.4	9.3	103.251	27.3793	79.4	2	43.587	33.196	38.3915
38	LPieBul2017Exp2_10	22_2017	9354c_TRA_Data	21/02/2019	10.921	55	156	0.916667	132	97.7273	0.0046	no	0.0895	0.0059	0.01282	0.00037	0.26202	78.0031	2.3	0.0497	0.0028	0.00404	0.00025	86.9	5.4	82.1	2.4	289	64	81.5	5	94.4764	28.4083	82.1	2.4	46.274	20.294	33.284
39	LPieBul1_7	27_1	9340c_TRA_Data	20/02/2019	10.23	51	840	1.25	900	104.667	0.0106	no	0.0973	0.0024	0.01305	0.00023	0.13971	76.6283	1.4	0.0529	0.0015	0.0046	0.00023	94.3	2.2	83.6	1.4	323	39	92.8	4.6	88.6532	25.8824	83.6	1.4	36.937	21.669	29.303
40	LPieBul2017Exp2_11	23_2017	9354c_TRA_Data	21/02/2019	11.319	57	1357	0.578482	328	359.146	0.0152	yes	0.0841	0.0012	0.01314	0.00015	0.95064	76.22	0.87	0.04636	0.00016	0.00412	0.00015	81.99	1.1	84.18	0.96	16.3	8.2	83.1	2.9	102.671	516.442	84.18	0.96	35.374	19.79	27.582
41	LPieBul2017Exp1_16	11_2017	9352c_TRA_Data	21/02/2019	8.6732	44	223.7	1.25704	111	190.991	0.009	no	0.0957	0.006	0.01331	0.00034	0.011674	75.1315	1.9	0.0532	0.0042	0.00434	0.0004	92.7	5.6	85.2	2.1	349	81	87.6	8	91.9094	24.4126	85.2	2.1	43.295	24.068	33.6815
42	LPieBul2017Exp1_6	1_2017	9352c_TRA_Data	21/02/2019	3.9931	20	7160	0.530726	860	827.907	0.0079	no	0.1026	0.0063	0.01426	0.00044	0.67712	70.1262	2.1	0.0534	0.0031	0.00254	0.00024	99.1	5.8	91.3	2.8	351	54	51.4	4.8	92.1292	26.0114	91.3	2.8	56.865	20.713	38.789
43	LPieBul1_5	46_1	9341c_TRA_Data	20/02/2019	5.1504	26	4410	3.95011	6520	76.5337	0.126	yes	0.0931	0.0019	0.01466	0.00034	1	67.9	1.6	0.0460771	4.8e-07	0.00341	0.00017	90.4	1.8	93.8	2.2	1.652	0.025	68.9	3.4	103.761	5677.97	93.8	2.2	27.088	24.67	25.879
44	LPieBul1LPieBul2_16	7_2	9343c_TRA_Data	20/02/2019	10.034	49	997	0.765296	860	130.116	0.101	yes	0.0968	0.0023	0.01518	0.00038	0.98815	66.3	1.6	0.046125	7.3e-05	0.00355	0.00038	93.8	2.2	97.1	2.4	4.1	3.7	71.7	7.6	103.518	2368.29	97.1	2.4	76.202	15.799	46.0005
45	LPieBul2Exp3_11	36_2	9349c_TRA_Data	21/02/2019	16.007	80	161	0.770186	222	85.5856	0.0036	no	0.1019	0.004	0.0152	0.00029	0.12614	65.7895	1.1	0.0487	0.002	0.00453	0.00019	98.4	3.7	97.2	1.9	252	51	91.4	3.7	98.7805	38.5714	97.2	1.9	27.94	20.453	24.1965
46	LPieBul2Exp3_16	41_2	9349c_TRA_Data	21/02/2019	11.55	58	2500	1.864	4010	105.237	0.1721	yes	0.1113	0.0033	0.01751	0.00052	1	57.4	1.7	0.0460714	2.1e-06	0.00354	0.00011	107.1	3	111.9	3.3	1.36	0.11	71.5	2.2	104.482	8227.94	111.9	3.3	31.497	24.979	28.238
47	LPieBul2017Exp3_15	73_1	9356c_TRA_Data	21/02/2019	9.3413	47	204	1.32353	1330	19.7744	0.0483	yes	0.1178	0.0037	0.01854	0.00038	0.99991	54.2	1.1	0.046078	3.3e-06	0.00376	0.00086	113	3.3	118.4	2.4	1.7	0.17	75.8	17	104.779	6964.71	118.4	2.4	28.9189	19.7297	24.3243
48	LPieBul1_9	50_1	9341c_TRA_Data	20/02/2019	17.373	87	222	1.02748	2240	17.8571	0.194	yes	0.1253	0.005	0.01968	0.00092	0.99715	51.8	2.1	0.046091	3.8e-05	0.00485	0.0003	119.7	4.6	125.6	5.8	2.3	2	97.8	6	104.929	5460.87	125.6	5.8	30.348	16.881	23.6145
49	LPieBul1LPieBul2_2	79_1	9343c_TRA_Data	20/02/2019	12.77	63	4640	2.08621	2870	228.571	0.0867	yes	0.1303	0.0043	0.02051	0.00072	1	49.2	1.7	0.0460711	1.8e-06	0.0049	0.00027	124.2	3.9	130.8	4.5	1.343	0.093	98.8	5.4	105.314	9739.39	130.8	4.5	29.176	22.957	26.0665
50	LPieBul1_9	10_1	9334c_TRA_Data	20/02/2019	16.989	86	4100	1.32439	1200	568.333	0.1223	yes	0.1417	0.011	0.0221	0.0016	0.99386	49	2.8	0.0460757	2.2e-06	0.00136	0.00015	133.8	9.5	140.7	9.9	1.58	0.11	27.4	3.1	105.157	8905.06	140.7	9.9	43.367	23.131	33.249
51	LPieBul2017Exp3_7	37_2017	9356c_TRA_Data	21/02/2019	9.611	49	614	0.506515	427	274.239	0.0158	yes	0.1506	0.0053	0.02317	0.00033	0.90942	43.11	0.66	0.04692	0.00072	0.00627	0.0015	142.4	4.7	147.7	2	44	36	126.3	30	103.722	335.682	147.7	2	32.287	22.521	27.404
52	LPieBul1_15	76_1	9342c_TRA_Data	20/02/2019	7.5355	37	252	1.90476	660	58.7879	0.0076	no	0.1654	0.0097	0.0235	0.00085	0.19342	42.5532	0.78	0.0525	0.0037	0.00719	0.00022	155.2	8.2	149.7	5.4	420	160	144.8	4.5	96.4562	35.6429	149.7	5.4	45.486	19.442	32.464
53	LPieBul1_8	69_1	9342c_TRA_Data	20/02/2019	10.661	54	1790	1.34637	650	413.846	0.004	no	0.165	0.0033	0.02386	0.00085	0.56625	41.9111	0.68	0.04959	0.00092	0.00757	0.00027	155.1	2.9	152	5.3	183	28	152.4	5.4	98.0013	83.0601	152	5.3	29.615	27.398	28.5065
54	LPieBul2017Exp1_0	59_2	9352c_TRA_Data	21/02/2019	11.588	58	191	1.44503	356	92.6966	0.0034	no	0.1729	0.011	0.02491	0.00056	0.22732	40.1445	0.87	0.0499	0.0035	0.00673	0.00055	161.6	9.8	158.6	3.5	351	78	135.5	11	98.1436	45.1852	158.6	3.5	22.5	16.6	19.55
55	LPieBul2Exp4_0	42_2	9351c_TRA_Data	21/02/2019	11.476	56	72.7	1.94773	249	59.0763	0.0046	no	0.1745	0.0094	0.02562	0.00075	0.24023	39.032	1.1	0.0519	0.0033	0.00746	0.00033	164.6	8.7	163.1	4.7	319	65	150.2	6.6	99.0887	51.1285	163.1	4.7	27.761	23.995	25.878
56	LPieBul1_12	73_1	9342c_TRA_Data	20/02/2019	6.32	31	189.3	0.940835	590	54.4068	0.0045	no	0.1914	0.0079	0.02719	0.0011	0.12808	36.7782	1	0.0513	0.0025	0.00894	0.00046	177.7	6.7	172.9	7.1	246	71	179.8	9.1	97.2988	70.2846	172.9	7.1	32.108	21.665	26.8865
57	LPieBul2Exp3_3	28_2	9349c_TRA_Data	21/02/2019	17.74	90	1210	0.347934	1480	241.892	0.0759	yes	0.266	0.012	0.0382	0.0015	0.97797	27	1.2	0.05023	0.00057	-0.00364	0.00051	238.2	9.8	241.3	9.4	201	27	-74	10	101.301	120.05	241.3	9.4	43.839	17.626	30.7325
58	LPieBul1_6	7_1	9334c_TRA_Data	20/02/2019	8.9744	46	567	0.564727	260	658.077	0.0041	no	0.2903	0.012	0.04036	0.0014	0.24636	24.777	0.34	0.0516	0.0016	0.01232	0.00047	258.6	9.7	255.1	9	260	43	247.4	9.4	98.6466	98.1154	255.1	9	32.238	23.378	27.808
59	LPieBul2Exp3_13	38_2	9349c_TRA_Data	21/02/2019	10.567	53	1600	1.96875	2190	248.858	0.1003	yes	0.312	0.021	0.0437	0.0024	0.98539	23.8	1.3	0.05137	0.00084	0.00175	0.00023	274	16	275	15	252	39	35.4	4.7	100.365	109.127	275	15	32.205	24.691	28.448
60	LPieBul1_7	68_1	9342c_TRA_Data	20/02/2019	7.9041	39	162.3	0.574245	303	155.116	0.0043	no	0.334	0.013	0.04571	0.0017	0.2383	21.8771	0.4	0.0525	0.002	0.0137	0.00058	292.4	9.6	288.1	11	309	49	275	12	98.5294	93.2362	288.1	11	35.732	21.155	28.4435
61	LPieBul2017Exp3_16	3_2_1	9357c_TRA_Data	21/02/2019	9.6485	49	184	1.23913	648	104.938	0.0628	yes	0.342	0.022	0.0493	0.0015	0.95192	20.56	0.7	0.05	0.0014	0.00509	0.001	297	17	310	9.4	185	68	102.7	21	104.377	167.568	310	9.4	44.1176	26.4706	35.2941
62	LPieBul2017Exp3_11	40_1	9356c_TRA_Data	21/02/2019	9.3995	47	2480	0.967742	3110	327.974	0.0662	yes	0.479	0.018	0.0628	0.0012	0.99938	15.98	0.31	0.05519	0.00038	0.00303	0.00086	396.8	12	392.8	7.4	419.9	15	61.1	17	98.9919	93.5461	392.8	7.4	34.019	22.263	28.141
63	LPieBul1_10	52_1	9341c_TRA_Data	20/02/2019	4.36	22	1481	1.66104	3720	184.409	0.0864	yes	0.48	0.022	0.0632	0.0018	0.91262	15.87	0.41	0.05548	0.00024	0.0105	0.0014	398	15	395.1	11	431.3	9.7	210	28	99.2714	91.6068	395.1	11	27.68	22.896	25.288
64	LPieBul1_1	2_1	9334c_TRA_Data	20/02/2019	10.809	55	3820	0.13089	520	3865.38	0.0866	yes	0.493	0.033	0.0641	0.0032	0.99982	15.83	0.52	0.05563	0.00051	-0.0185	0.002	406	22	401	19	437	20	-378	42	98.7685	91.762	401	19	33.965	22.649	28.307
65	LPieBul1LPieBul2_12	3_2	9343c_TRA_Data	20/02/2019	4.5359	22	620	0.424194	1130	228.319	0.0186	yes	0.521	0.017	0.068	0.0021	0.99961	14.75	0.38	0.0555	0.00028	0.00531	0.00081	426	11	424	12	432	11	107	16	99.5305	98.1481	424	12	45.162	37.475	41.3185
66	LPieBul2_6	14_2	9344c_TRA_Data	20/02/2019	15.834	80	619	0.919225	622	572.347	0.0566	yes	0.509	0.028	0.0685	0.0026	0.97116	14.94	0.58	0.0532	0.0013	0.01338	0.001	414	19	427	16	320	60	269	20	103.14	133.438	427	16	44.993	29.683	37.338
67	LPieBul2Exp4_10	52_2	9351c_TRA_Data	21/02/2019	9.6963	48	224.7	0.427681	430	281.395	0.0026	no	0.532	0.014	0.0686	0.0019	0.5189	14.5773	0.37	0.0564	0.0019	0.021	0.0014	432.4	9.5	428	11	454	52	419	28	98.9824	94.2731	428	11	28.77	20.036	24.403
68	LPieBul1_7	48_1	9341c_TRA_Data	20/02/2019	4.92	24	205.8	0.751215	490	206.122	0.0024	no	0.565	0.02	0.0715	0.0017	0.43439	13.986	0.3	0.0568	0.0017	0.02138	0.00084	455	13	445.1	10	490	39	428	17	97.8242	90.8367	445.1	10	31.643	24.566	28.1045
69	LPieBul1LPieBul2_4	81_1	9343c_TRA_Data	20/02/2019	16.32	82	292	0.560959	209	677.033	0.0016	no	0.562	0.014	0.073	0.0015	0.2267	13.6986	0.18	0.0565	0.0012	0.0194	0.00072	452.3	9.1	454.1	9.1	453	32	388.3	14	100.398	100.243	454.1	9.1	29.32	22.837	26.0785
70	LPieBul2Exp4_2	44_2	9351c_TRA_Data	21/02/2019	22.296	113	2600	0.253846	1220	1319.67	0.0319	yes	0.612	0.016	0.0775	0.0019	0.99981	13.07	0.29	0.05713	0.0006	0.00295	0.0011	483.4	10	480.8	12	495.8	23	59	22	99.4621	96.9746	480.8	12	23.6	20	21.8
71	LPieBul2Exp4_15	57_2	9351c_TRA_Data	21/02/2019	12.555	63	516	1.19574	224	1562.5	0.0063	no	0.7161	0.01	0.08407	0.0015	0.5988	11.8948	0.14	0.05964	0.0015	0.02521	0.00072	548.1	6.2	520.3	9	588	38	503.1	14	94.9279	88.4864	520.3	9	18.632	16.987	17.8095
72	LPieBul1_3	22_1	9340c_TRA_Data	20/02/2019	6.5338	33	4890	0.815951	3050	993.77	0.0514	yes	0.719	0.031	0.088	0.003	0.99972	11.47	0.4	0.05914	0.00052	0.00069	0.00048	549	18	544	18	572	19	13.9	9.6	99.0893	95.1049	544	18	57.693	21.914	39.8035
73	LPieBul2017Exp1_11	6_2017	9352c_TRA_Data	21/02/2019	5.2754	26	295	1.12881	90	2153.33	0.0035	no	0.765	0.039	0.0908	0.0015	0.39149	11.0132	0.19	0.0612	0.0034	0.02672	0.0022	577	22	560.5	9.1	645	35	533	43	97.1404	86.8992	560.5	9.1	47.597	25.637	36.617
74	LPieBul2017Exp3_1	31_2017	9356c_TRA_Data	21/02/2019	7.1704	36	345	0.744928	224	959.821	0.0043	no	0.742	0.041	0.0917	0.0023	0.65639	10.9051	0.27	0.0582	0.0034	0.0311	0.0043	563	24	566	13	537	52	618	84	100.533	105.4	566	13	35.426	23.653	29.5395
75	LPieBul2017Exp1_12	7_2017	9352c_TRA_Data	21/02/2019	6.9029	34	188	1.51755	154	916.234	0.0012	no	0.837	0.042	0.1013	0.0015	0.41047	9.87167	0.16	0.0598	0.0032	0.02587	0.002	617	23	622	9.1	586	35	516	40	100.81	106.143	622	9.1	39	23	31
76	LPieBul1_6	26_1	9340c_TRA_Data	20/02/2019	6.4465	33	1065	0.322066	4000	209.75	0.0933	yes	0.88	0.032	0.102	0.0027	0.99772	9.86	0.26	0.06244	0.00062	0.0022	0.0017	640	17	626	16	688	21	44	34	97.8125	90.9884	626	16	48.518	23.129	35.8235
77	LPieBul2017Exp3_9	39_2017	9356c_TRA_Data	21/02/2019	17.227	86	491	0.113849	340	1000	0.0059	no	0.971	0.053	0.1038	0.0014	0.24211	9.63391	0.13	0.0672	0.004	0.0214	0.004	688	27	636.5	8.2	834	37	426	79	92.5145	76.3189	636.5	8.2	47.471	19.198	33.3345
78	LPieBul2Exp3_14	39_2	9349c_TRA_Data	21/02/2019	26.17	129	65.8	0.306991	190	328.947	0.0021	no	0.896	0.023	0.1053	0.0022	0.69076	9.49668	0.18	0.0617	0.0011	0.0391	0.004	648	12	645	13	658	23	770	76	99.537	98.0243	645	13	29.183	23.322	26.2525
79	LPieBul2Exp4_9	51_2	9351c_TRA_Data	21/02/2019	8.8553	44	468	0.619658	419	892.601	0.0244	yes	0.921	0.046	0.1073	0.0044	0.99904	9.48	0.4	0.06199	0.0012	0.0068	0.00091	660	25	657	26	672	41	137	18	99.5455	97.7679	657	26	25.134	23.282	24.208
80	LPieBul1LPieBul2_0	77_1	9343c_TRA_Data	20/02/2019	12.377	62	1917	0.637454	1400	1027.14	0.0158	no	1.228	0.038	0.1165	0.0034	0.94583	8.58369	0.22	0.07753	0.0011	0.0313	0.0015	812	17	710	20	1135	15	623	29	87.4384	62.5551	710	20	29.009	19.168	24.0885
81	LPieBul1_11	53_1	9341c_TRA_Data	20/02/2019	4.7316	24	3280	0.308537	800	3525	0.0382	yes	1.106	0.026	0.1232	0.0022	0.99957	8.13	0.13	0.06508	0.00031	0.0048	0.0035	756	12	749	13	777	10	97	70	99.0741	96.3964	749	13	31.426	19.846	25.636
82	LPieBul2Exp3_1	26_2	9349c_TRA_Data	21/02/2019	21.373	108	663	0.160935	369	2040.65	0.0024	no	1.345	0.033	0.135	0.0031	0.92968	7.40741	0.16	0.07216	0.00067	0.0281	0.0019	863	14	816	17	990	14	560	38	94.5539	82.4242	816	17	27	24	25.5
83	LPieBul2017Exp2_7	19_2017	9354c_TRA_Data	21/02/2019	13.992	71	237	1.87342	590	401.695	0.0628	yes	1.314	0.1	0.1369	0.0072	0.99861	7.66	0.39	0.0684	0.0013	0.0202	0.0013	838	43	825	41	874	38	404	26	98.4487	94.3936	825	41	32.343	13.636	22.9895
84	LPieBul2Exp3_15	40_2	9349c_TRA_Data	21/02/2019	17.501	89	1350	0.6	749	2229.64	0.0366	yes	1.36	0.11	0.1395	0.0079	0.9947	7.67	0.42	0.0687	0.0017	-0.054	0.017	849	45	839	44	875	49	-1190	360	98.8221	95.8857	839	44	30.961	25.89	28.4255
85	LPieBul1_10	71_1	9342c_TRA_Data	20/02/2019	23.115	117	2190	0.0178995	1402	1619.12	0.03618	yes	1.384	0.033	0.1451	0.0052	0.96766	6.93	0.11	0.06915	0.0009	-0.72	0.085	880	14	873	29	902	27	-20500	3700	99.2045	96.7849	873	29	31.51	19.198	25.354
86	LPieBul2017Exp1_14	9_2017	9352c_TRA_Data	21/02/2019	4.5968	23	1000	0.998	640	1748.44	0.0494	yes	1.434	0.11	0.1479	0.0049	0.99941	6.8	0.23	0.07015	0.0026	0.0082	0.0025	901	47	889	27	931	75	165	49	98.6681	95.4887	889	27	29.521	17.976	23.7485
87	LPieBul2017Exp2_0	12_2017	9354c_TRA_Data	21/02/2019	10.01	50	217.3	0.511275	164	1298.78	0.0036	no	1.554	0.045	0.1547	0.0036	0.76814	6.46412	0.15	0.073	0.0012	0.0492	0.0017	954	19	927	20	1015	16	970	33	97.1698	91.33	927	20	40.955	24.573	32.764
88	LPieBul2017Exp3_18	40_2	9357c_TRA_Data	21/02/2019	6.4158	33	541	0.0822551	290	2027.59	0.0388	yes	1.602	0.14	0.1603	0.0053	0.93762	6.3	0.22	0.0726	0.0028	-0.172	0.082	967	53	958	30	1000	74	-4300	2100	99.0693	95.8	958	30	24.4898	20.4082	22.449
89	LPieBul1_16	17_1	9335c_TRA_Data	20/02/2019	10.723	54	143	1.54545	290	675.862	0.0359	yes	1.718	0.14	0.1677	0.0089	0.99872	6.07	0.22	0.0738	0.0012	0.0202	0.0025	1008	52	998	49	1031	34	403	49	99.0079	96.7992	998	49	28.434	25.691	27.0625
90	LPieBul2017Exp2_1	13_2017	9354c_TRA_Data	21/02/2019	26.283	132	53.9	0.736549	272	251.103	0.0016	no	1.818	0.046	0.1781	0.0031	0.72934	5.61482	0.097	0.07456	0.00099	0.05199	0.0011	1049	16	1056	17	1052	17	1024	20	100.667	100.38	1056	17	37.348	26.854	32.101
91	LPieBul2Exp4_14	56_2	9351c_TRA_Data	21/02/2019	24.547	123	140.7	0.958067	240	1016.67	0.00018	no	2.252	0.03	0.2022	0.0033	0.64247	4.9456	0.045	0.07848	0.0019	0.0619	0.0018	1196.5	9.3	1186.9	18	1156.6	26	1214	34	99.1977	102.62	1156.6	26	26	17	21.5
92	LPieBul2017Exp1_10	5_2017	9352c_TRA_Data	21/02/2019	8.8029	44	31.2	0.684295	99	342.121	0.0032	no	2.022	0.13	0.1899	0.0072	0.73394	5.26593	0.19	0.0785	0.0045	0.0518	0.0045	1118	44	1119	39	1163	31	1021	86	100.089	96.2167	1163	31	39.838	27.396	33.617
93	LPieBul1_1	20_1	9340c_TRA_Data	20/02/2019	6.8551	34	115.2	1.14844	1200	163	0	no	2.981	0.072	0.2478	0.0056	0.69109	4.03551	0.082	0.0881	0.0017	0.0713	0.0019	1401	18	1427	29	1382	16	1392	37	101.856	103.256	1382	16	55.492	20.58	38.036
94	LPieBul2017Exp2_6	18_2017	9354c_TRA_Data	21/02/2019	10.946	54	90.7	0.496141	209	669.856	0.0014	no	3.032	0.084	0.2455	0.0045	0.85459	4.07332	0.08	0.0888	0.0011	0.0759	0.0023	1414	21	1415	24	1402	13	1478	44	100.071	100.927	1402	13	34.423	24.278	29.3505
95	LPieBul1_10	31_1	9340c_TRA_Data	20/02/2019	9.0859	45	76.3	1.22543	390	336.923	0.0021	no	2.991	0.063	0.2445	0.0051	0.8061	4.08998	0.091	0.0891	0.0014	0.0714	0.0021	1404	16	1410	27	1402	16	1394	40	100.427	100.571	1402	16	41.267	18.545	29.906
96	LPieBul2017Exp1_15	10_2017	9352c_TRA_Data	21/02/2019	13.446	67	156	0.405128	435	572.414	0.0046	yes	2.626	0.12	0.2108	0.0025	0.48726	4.74383	0.059	0.0893	0.0046	0.0682	0.0053	1307	35	1233	13	1409	20	1334	100	94.3382	87.5089	1409	20	32.3	30.001	31.1505
97	LPieBul2Exp4_8	50_2	9351c_TRA_Data	21/02/2019	4.4595	23	276	0.476087	510	994.118	0.0014	no	2.977	0.075	0.2423	0.006	0.6578	4.12711	0.085	0.0892	0.0026	0.0722	0.0025	1401	19	1398	31	1410	33	1410	47	99.7859	99.1489	1410	33	24.755	16.184	20.4695
98	LPieBul1LPieBul2_13	4_2	9343c_TRA_Data	20/02/2019	5.5936	28	1049	0.438513	259	5984.56	0.00029	no	2.952	0.064	0.2374	0.0058	0.61855	4.2123	0.076	0.0895	0.0017	0.0676	0.0024	1395	17	1373	30	1415	19	1322	45	98.4229	97.0318	1415	19	53	21	37
99	LPieBul2Exp4_12	54_2	9351c_TRA_Data	21/02/2019	8.5187	43	243.4	0.358258	185	2581.08	0.00026	no	3.151	0.072	0.2517	0.0079	0.85814	3.97298	0.13	0.0908	0.0025	0.072	0.0027	1444	18	1446	41	1441	32	1405	51	100.139	100.347	1441	32	34.724	15.29	25.007
100	LPieBul2_12	20_2	9344c_TRA_Data	20/02/2019	18.021	90	57	0.882456	145	764.828	0.0007	no	3.237	0.069	0.2549	0.0045	0.76574	3.92311	0.071	0.0915	0.0014	0.0766	0.0022	1463	16	1463	23	1455	18	1492	41	100	100.55	1455	18	31.239	19.514	25.3765
101	LPieBul1_3	43_1	9341c_TRA_Data	20/02/2019	8.8446	45	154.7	0.911441	580	477.586	0.0037	no	3.25	0.091	0.2535	0.006	0.81523	3.94477	0.088	0.0919	0.0016	0.0829	0.0027	1467	22	1456	31	1463	27	1610	50	99.2502	99.5215	1463	27	26	21	23.5
102	LPieBul2Exp4_5	47_2	9351c_TRA_Data	21/02/2019	18.922	95	506	0.749012	534	2033.71	0.0056	no	3.148	0.037	0.2458	0.0043	0.57943	4.06835	0.045	0.09191	0.0023	0.0849	0.0033	1446.2	9.1	1417	22	1468	30	1647	61	97.9809	96.5259	1468	30	32.942	21.655	27.2985
103	LPieBul2Exp4_3	45_2	9351c_TRA_Data	21/02/2019	7.5734	38	215	0.69814	230	1826.09	0.0035	no	3.199	0.062	0.258	0.0061	0.4428	3.87597	0.076	0.0921	0.0028	0.0793	0.0029	1456	15	1479	31	1471	37	1542	54	101.58	100.544	1471	37	25.033	22.329	23.681
104	LPieBul2Exp3_9	34_2	9349c_TRA_Data	21/02/2019	23.543	118	233.5	0.469807	206	2606.8	0.00117	no	3.425	0.061	0.2649	0.0037	0.65798	3.77501	0.043	0.0935	0.0011	0.0791	0.0022	1508	14	1514	19	1495	18	1538	40	100.398	101.271	1495	18	29.331	20.412	24.8715
105	LPieBul2017Exp3_13	63_1	9356c_TRA_Data	21/02/2019	5.4429	27	702	0.156695	200	5835	-0.00031	no	3.57	0.2	0.27	0.0058	0.80908	3.7037	0.084	0.0944	0.0055	0.0632	0.012	1541	46	1540	29	1515	19	1230	220	99.9351	101.65	1515	19	30.5	20	25.25
106	LPieBul2017Exp3_12	54_1	9356c_TRA_Data	21/02/2019	18.704	94	328.3	0.539141	790	667.468	0.009	no	3.047	0.16	0.2311	0.0024	0.32876	4.32713	0.045	0.0965	0.0057	0.075	0.01	1419	42	1340	13	1547	16	1468	210	94.4327	86.6193	1547	16	52.088	17.72	34.904
107	LPieBul2017Exp2_4	16_2017	9354c_TRA_Data	21/02/2019	9.1932	46	1059	0.11577	200	8000	0.00043	no	3.301	0.062	0.2429	0.0027	0.63487	4.11692	0.046	0.09783	0.00088	0.0727	0.0016	1480.9	15	1401	14	1582	10	1419	30	94.6046	88.5588	1582	10	33.34	27.933	30.6365
108	LPieBul2017Exp1_2	61_2	9352c_TRA_Data	21/02/2019	8.1654	42	259	0.787645	280	1967.86	-0.0022	no	3.825	0.17	0.2813	0.0043	0.74492	3.55492	0.056	0.0987	0.005	0.0664	0.0052	1597	37	1598	22	1600	13	1299	98	100.063	99.875	1600	13	73.217	27.702	50.4595
109	LPieBul2017Exp1_5	64_2	9352c_TRA_Data	21/02/2019	17.182	86	818	0.123105	316	6360.76	-0.00015	no	4.087	0.18	0.2965	0.0026	0.75027	3.37268	0.031	0.0996	0.0049	0.0595	0.0046	1651.1	37	1676	14	1615.6	9.4	1168	88	101.508	103.739	1615.6	9.4	47.456	29.089	38.2725
110	LPieBul2_7	15_2	9344c_TRA_Data	20/02/2019	13.103	67	472	0.143644	290	3375.86	-0.00018	no	4.008	0.053	0.2912	0.0036	0.77073	3.43407	0.04	0.09989	0.0011	0.069	0.004	1635	11	1647	18	1622	13	1346	76	100.734	101.541	1622	13	25.673	24.259	24.966
111	LPieBul1_3	63_1	9342c_TRA_Data	20/02/2019	4.4027	22	1240	0.0992742	310	6774.19	0.00022	no	3.971	0.078	0.2809	0.0096	0.74174	3.55999	0.044	0.1012	0.0017	0.0911	0.0032	1628	16	1596	48	1643	16	1762	60	98.0344	97.1394	1643	16	41.57	20.132	30.851
112	LPieBul1_14	15_1	9335c_TRA_Data	20/02/2019	5.4851	27	171.7	0.750146	300	1230	0.0024	no	3.95	0.16	0.2828	0.011	0.21599	3.53607	0.075	0.1012	0.0032	0.0805	0.0028	1623	33	1605	56	1645	29	1565	52	98.8909	97.5684	1645	29	31.009	28.368	29.6885
113	LPieBul2Exp3_6	31_2	9349c_TRA_Data	21/02/2019	13.685	69	133.4	0.792354	347	902.017	0.0017	no	4.155	0.073	0.295	0.0049	0.74704	3.38983	0.051	0.1016	0.0011	0.0855	0.0015	1664	14	1666	24	1656	12	1658	28	100.12	100.604	1656	12	31.033	17.574	24.3035
114	LPieBul1_4	45_1	9341c_TRA_Data	20/02/2019	7.9762	41	491	0.32057	1130	893.805	0.00031	no	4.25	0.11	0.2975	0.0069	0.85829	3.36135	0.07	0.103	0.0012	0.0838	0.0027	1682	21	1678	34	1679	11	1627	51	99.7622	99.9404	1679	11	43.555	29.992	36.7735
115	LPieBul2017Exp2_5	17_2017	9354c_TRA_Data	21/02/2019	28.208	141	223	0.672646	236	2025.42	0.00185	no	4.345	0.1	0.3048	0.0053	0.92916	3.28084	0.057	0.10355	0.00069	0.0798	0.0044	1700	19	1713	26	1681.2	6.6	1546	82	100.765	101.892	1681.2	6.6	38.959	23.17	31.0645
116	LPieBul1LPieBul2_1	78_1	9343c_TRA_Data	20/02/2019	8.3128	42	620	0.198387	1250	897.6	-0.00069	no	4.199	0.1	0.3001	0.0071	0.72401	3.33222	0.059	0.1032	0.0018	0.0578	0.003	1673	20	1691	35	1682	16	1135	58	101.076	100.535	1682	16	14.8	14.4	14.6
117	LPieBul1_0	59_1	9342c_TRA_Data	20/02/2019	3.9825	20	471	1.21444	730	1147.95	0.0014	no	4.244	0.073	0.2963	0.011	0.40419	3.37496	0.064	0.1031	0.0023	0.0859	0.0023	1682	14	1672	54	1682	20	1665	43	99.4055	99.4055	1682	20	33.376	28.397	30.8865
118	LPieBul2017Exp3_14	67_1	9356c_TRA_Data	21/02/2019	2.2967	11	3010	0.757475	900	5655.56	-0.0093	no	4.122	0.22	0.281	0.0054	0.112	3.55872	0.068	0.1039	0.0064	0.0699	0.01	1658	43	1596	27	1684	17	1365	200	96.2606	94.7743	1684	17	31.369	23.922	27.6455
119	LPieBul2017Exp3_6	36_2017	9356c_TRA_Data	21/02/2019	13.504	68	530	0.506981	239	4468.62	-1.3e-05	no	4.448	0.23	0.3115	0.0042	0.69816	3.21027	0.042	0.1032	0.0059	0.0798	0.011	1720.6	42	1747	21	1685	15.2	1552	200	101.534	103.68	1685	15.2	32	16.5	24.25
120	LPieBul2Exp4_7	49_2	9351c_TRA_Data	21/02/2019	6.7173	33	1189	0.0208579	370	7162.16	-0.00057	no	4.164	0.065	0.2916	0.0063	0.44334	3.42936	0.057	0.1036	0.0029	0.0521	0.0062	1666	13	1649	31	1687	29	1020	120	98.9796	97.7475	1687	29	29.092	20.03	24.561
121	LPieBul1_15	38_1	9340c_TRA_Data	20/02/2019	8.8025	45	238	0.486975	402	1064.43	0.0081	no	3.678	0.088	0.2598	0.0066	0.86944	3.84911	0.095	0.1038	0.0015	0.0853	0.0025	1565	19	1488	34	1691	13	1654	46	95.0799	87.9953	1691	13	32.607	28.036	30.3215
122	LPieBul1_0	1_1	9334c_TRA_Data	20/02/2019	6.6399	33	97.2	1.56276	270	807.778	0.0002	no	4.27	0.19	0.297	0.013	0.8177	3.367	0.091	0.1032	0.0024	0.0817	0.003	1685	36	1675	63	1692	39	1587	57	99.4065	98.9953	1692	39	48.323	32.767	40.545
123	LPieBul1_2	21_1	9340c_TRA_Data	20/02/2019	5.4883	28	366	0.415301	960	740.625	-0.0001	no	4.102	0.07	0.292	0.0055	0.74581	3.42466	0.064	0.1037	0.0014	0.0819	0.0022	1654	14	1651	28	1692	12	1592	40	99.8186	97.5768	1692	12	37.441	25.063	31.252
124	LPieBul1_9	30_1	9340c_TRA_Data	20/02/2019	8.7945	44	1340	0.715672	410	6756.1	-0.0008	no	4.202	0.05	0.2958	0.0035	0.53168	3.38066	0.039	0.1038	0.0013	0.0801	0.0023	1674	9.8	1670	17	1692	12	1558	43	99.7611	98.6998	1692	12	37.223	27.278	32.2505
125	LPieBul2017Exp2_14	28_2017	9354c_TRA_Data	21/02/2019	11.768	59	396	0.306313	243	3024.69	0.003	no	4.139	0.086	0.2888	0.0044	0.73291	3.4626	0.052	0.104	0.001	0.0926	0.0019	1661	17	1635	22	1698	10	1789	35	98.4347	96.2898	1698	10	35.357	30.165	32.761
126	LPieBul2017Exp1_13	8_2017	9352c_TRA_Data	21/02/2019	6.6902	33	68	1.41912	255	576.863	-0.0035	no	4.191	0.2	0.2908	0.0065	0.66561	3.43879	0.076	0.1043	0.0054	0.0752	0.006	1671	40	1645	32	1701	18	1465	110	98.444	96.7078	1701	18	34.64	27.774	31.207
127	LPieBul2017Exp3_10	37_1	9356c_TRA_Data	21/02/2019	28.56	140	720	0.456944	860	1825.58	-0.0004	no	4.292	0.23	0.2983	0.0065	0.95723	3.35233	0.07	0.10444	0.0059	0.064	0.0094	1687	43	1680	32	1704.9	12	1249	180	99.5851	98.5395	1704.9	12	35.067	27.462	31.2645
128	LPieBul1_13	14_1	9335c_TRA_Data	20/02/2019	9.8549	50	404	0.581188	210	3890.48	-0.0059	no	3.743	0.14	0.2592	0.0089	0.5544	3.85803	0.037	0.1046	0.0023	0.0697	0.0021	1580	31	1485	46	1706	25	1361	40	93.9873	87.0457	1706	25	29.69	23.073	26.3815
129	LPieBul1_10	11_1	9334c_TRA_Data	20/02/2019	9.2538	47	278.4	0.519397	270	2356.67	0	no	4.435	0.17	0.3037	0.011	0.70065	3.29272	0.045	0.1048	0.0024	0.0831	0.0025	1718	32	1709	54	1712	24	1614	46	99.4761	99.8248	1712	24	28.839	25.249	27.044
130	LPieBul1LPieBul2_7	85_1	9343c_TRA_Data	20/02/2019	3.7902	19	1390	0.493525	660	3348.48	-0.0002	no	3.86	0.16	0.268	0.011	0.96377	3.73134	0.15	0.1049	0.0016	0.0581	0.0064	1603	34	1531	56	1713	17	1140	120	95.5084	89.3754	1713	17	34.603	22.364	28.4835
131	LPieBul1_14	58_1	9341c_TRA_Data	20/02/2019	16.148	81	685	0.332847	710	1794.37	-0.0016	no	3.654	0.082	0.2544	0.0055	0.88703	3.93082	0.073	0.10496	0.00081	0.0612	0.0037	1559	18	1460	28	1715.6	9.6	1198	69	93.6498	85.1014	1715.6	9.6	31.022	26.729	28.8755
132	LPieBul1LPieBul2_11	2_2	9343c_TRA_Data	20/02/2019	5.2165	27	892	0.122197	370	4337.84	-0.00037	no	4.34	0.12	0.2974	0.008	0.81514	3.36247	0.072	0.1051	0.0018	0.0788	0.0038	1700	24	1678	40	1716	15	1532	71	98.7059	97.7855	1716	15	23.511	20.387	21.949
133	LPieBul1_9	70_1	9342c_TRA_Data	20/02/2019	7.1004	35	776	0.201031	650	2261.54	0.00034	no	4.5	0.12	0.3072	0.012	0.84577	3.25521	0.078	0.1052	0.0019	0.0914	0.0032	1729	22	1726	60	1720	20	1766	59	99.8265	100.349	1720	20	31.856	19.663	25.7595
134	LPieBul1_11	12_1	9335c_TRA_Data	20/02/2019	13.099	66	1874	0.0662753	280	15750	2.5e-05	no	4.461	0.17	0.3059	0.011	0.80457	3.26904	0.038	0.10548	0.0022	0.0752	0.0051	1723.2	31	1720	53	1725.4	27	1462	97	99.8143	99.687	1725.4	27	36	20	28
135	LPieBul2Exp3_7	32_2	9349c_TRA_Data	21/02/2019	24.589	124	268	0.186567	430	1579.07	-0.00079	no	4.485	0.077	0.3059	0.0048	0.86393	3.26904	0.045	0.10584	0.00092	0.0974	0.0061	1726	14	1720	24	1727.3	11	1870	110	99.6524	99.5774	1727.3	11	30.085	20.94	25.5125
136	LPieBul1_12	55_1	9341c_TRA_Data	20/02/2019	16.061	81	827	0.171705	1740	1097.7	0.0023	no	3.88	0.11	0.2724	0.0057	0.61883	3.67107	0.068	0.10608	0.0007	0.043	0.014	1605	25	1552	29	1731.9	8.1	820	250	96.6978	89.6126	1731.9	8.1	34.757	24.122	29.4395
137	LPieBul1LPieBul2_9	88_1	9343c_TRA_Data	20/02/2019	11.206	56	344.1	0.62104	357	1949.58	5e-05	no	4.52	0.091	0.3109	0.0062	0.64417	3.21647	0.039	0.10664	0.0015	0.0849	0.0031	1734	17	1745	31	1738	16	1647	58	100.634	100.403	1738	16	29.662	23.699	26.6805
138	LPieBul1_2	61_1	9342c_TRA_Data	20/02/2019	11.602	58	1522	0.0689882	910	3494.51	-0.00025	no	4.615	0.072	0.3108	0.01	0.78174	3.2175	0.038	0.10663	0.0015	0.0549	0.0045	1751	13	1748	55	1741.1	15	1078	86	99.8287	100.396	1741.1	15	36.442	21.991	29.2165
139	LPieBul2017Exp2_3	15_2017	9354c_TRA_Data	21/02/2019	7.325	37	878	0.679954	262	6496.18	-0.00062	no	4.71	0.14	0.315	0.0076	0.93159	3.1746	0.08	0.10753	0.00091	0.0813	0.0026	1767	25	1764	37	1757	10	1579	49	99.8302	100.398	1757	10	35.226	23.891	29.5585
140	LPieBul1LPieBul2_3	80_1	9343c_TRA_Data	20/02/2019	8.7695	45	980	0.266327	1630	957.055	0.0103	yes	3.87	0.18	0.264	0.011	0.91655	3.78788	0.17	0.1077	0.0021	0.038	0.011	1602	37	1508	58	1766	32	750	210	94.1323	85.3907	1766	32	32.208	23.778	27.993
141	LPieBul2_5	13_2	9344c_TRA_Data	20/02/2019	12.15	61	1887	0.752517	381	10918.6	-0.00068	no	4.723	0.041	0.3157	0.0033	0.62655	3.16756	0.033	0.10861	0.0011	0.0855	0.0036	1771	7.4	1768	16	1776.3	11	1657	66	99.8306	99.5327	1776.3	11	29.036	23.111	26.0735
142	LPieBul2Exp4_13	55_2	9351c_TRA_Data	21/02/2019	6.2791	31	307.2	0.331055	240	3100	-0.0024	no	4.815	0.08	0.3141	0.0059	0.44246	3.1837	0.041	0.1102	0.003	0.0784	0.0034	1787	14	1761	29	1804	35	1525	63	98.545	97.6164	1804	35	33.824	13.762	23.793
143	LPieBul1_1	60_1	9342c_TRA_Data	20/02/2019	7.2994	37	238.4	0.876678	1120	403.571	0.0014	no	4.411	0.081	0.2853	0.011	0.79511	3.50508	0.078	0.1116	0.002	0.0834	0.0025	1714	15	1617	55	1825	23	1619	46	94.3407	88.6027	1825	23	30.509	19.7	25.1045
144	LPieBul2_9	17_2	9344c_TRA_Data	20/02/2019	19.097	96	62.6	0.822684	275	581.818	0.0015	no	5.197	0.091	0.3359	0.0063	0.87461	2.97708	0.055	0.1119	0.0014	0.0944	0.0026	1850	15	1871	29	1832	15	1822	48	101.135	102.129	1832	15	32.981	22.021	27.501
	Discordant Analyses (More than +5 to -10% '68/75' discordance for <1100Ma '6/8' age; +5 to -15% '68/76' discordance for ≥1100Ma '7/6' age)
145	LPieBul2017Exp1_1	60_2	9352c_TRA_Data	21/02/2019	5.2975	26	457	0.613567	267	287.266	0.027	yes	0.1531	0.0046	0.02403	0.00049	0.96297	41.72	0.83	0.0460702	4.3e-06	0.00539	0.00074	144.6	4.1	153.1	3.1	1.29	0.22	108.7	15	105.878	11868.2	153.1	3.1	18.366	8.781	13.5735
146	LPieBul2017Exp1_8	3_2017	9352c_TRA_Data	21/02/2019	7.4893	37	2740	0.580292	2690	213.383	0.075	yes	0.1947	0.0084	0.0305	0.0012	0.984	32.9	1.2	0.0460706	8.5e-07	0.00614	0.00057	180.4	7.1	193.4	7.4	1.317	0.044	124	12	107.206	14684.9	193.4	7.4	24.051	21.002	22.5265
147	LPieBul2_3	11_2	9344c_TRA_Data	20/02/2019	19.55	98	1650	0.521212	1197	531.328	0.0452	yes	0.3422	0.0083	0.05055	0.00073	0.82131	19.89	0.31	0.049	0.00079	0.00648	0.00065	298.4	6.3	317.9	4.5	139	37	131	13	106.535	228.705	317.9	4.5	43.123	19.301	31.212
148	LPieBul2017Exp3_4	34_2017	9356c_TRA_Data	21/02/2019	9.461	47	1188	0.667508	700	661.429	0.0431	yes	0.377	0.038	0.0553	0.0019	0.91194	18.33	0.61	0.0492	0.004	0.0091	0.0019	324	28	347	12	147	180	183	39	107.099	236.054	347	12	31.448	20.685	26.0665
149	LPieBul2017Exp3_5	35_2017	9356c_TRA_Data	21/02/2019	8.5787	43	154.2	0.845006	290	196.897	0.0272	yes	0.39	0.03	0.0566	0.0022	0.92469	17.77	0.7	0.05	0.0019	0.01511	0.0023	333	21	355	13	181	88	303	45	106.607	196.133	355	13	38.484	16.912	27.698
150	LPieBul2_11	19_2	9344c_TRA_Data	20/02/2019	7.5769	38	168	1.01667	380	684.211	0.0059	yes	2.125	0.062	0.1831	0.0053	0.87237	5.4615	0.16	0.084	0.0014	0.0443	0.0036	1155	20	1083	29	1293	21	874	70	93.7662	83.7587	1293	21	35.789	20.651	28.22
151	LPieBul1_5	25_1	9340c_TRA_Data	20/02/2019	13.127	66	5300	0.239623	3630	1688.71	0.0154	yes	1.942	0.044	0.1619	0.0035	0.80722	6.17665	0.13	0.0866	0.0012	0.0365	0.0018	1094	15	967	19	1352	20	725	35	88.3912	71.5237	1352	20	28.434	24.338	26.386
152	LPieBul2_15	23_2	9344c_TRA_Data	20/02/2019	9.2762	46	1098	0.419854	360	3566.67	0.0144	yes	2.017	0.02	0.1661	0.0019	0.61054	6.02047	0.069	0.08759	0.001	0.0451	0.0015	1120.9	6.7	990	10	1372	12	891	29	88.3219	72.1574	1372	12	25	25	25
153	LPieBul1_15	16_1	9335c_TRA_Data	20/02/2019	3.5532	18	603	0.542289	600	1533.33	-0.0017	no	2.498	0.099	0.2006	0.0079	0.72785	4.98505	0.1	0.0909	0.0024	0.0579	0.0023	1271	29	1179	42	1444	29	1137	44	92.7616	81.6482	1444	29	37.712	20.026	28.869
154	LPieBul1_14	75_1	9342c_TRA_Data	20/02/2019	17.476	87	482	0.543568	863	697.567	0.0172	yes	2.182	0.041	0.174	0.0062	0.91691	5.74713	0.096	0.09163	0.0012	0.0582	0.0024	1174	13	1034	34	1459.3	15	1143	46	88.075	70.8559	1459.3	15	20.7	18	19.35
155	LPieBul1_4	5_1	9334c_TRA_Data	20/02/2019	5.5567	28	6990	0.2103	360	25583.3	0.0143	yes	2.32	0.099	0.1793	0.0074	0.73432	5.57724	0.14	0.093	0.0024	0.0575	0.0049	1218	31	1063	40	1485	34	1129	93	87.2742	71.5825	1485	34	31.756	26.521	29.1385
156	LPieBul2Exp4_11	53_2	9351c_TRA_Data	21/02/2019	17.834	90	899	0.29366	706	2152.97	0.021	yes	2.76	0.035	0.2046	0.0037	0.63564	4.88759	0.056	0.09797	0.0024	0.0178	0.0022	1345.5	9.8	1199	20	1587	33	355	43	89.1119	75.5514	1587	33	37.008	18.488	27.748
157	LPieBul2017Exp3_17	6_2_1	9357c_TRA_Data	21/02/2019	5.4309	27	1154	0.0299827	310	4719.35	0.0106	yes	2.724	0.15	0.1993	0.0039	0.73137	5.01756	0.098	0.0981	0.0057	0.0624	0.0093	1334	40	1171	21	1588	15	1223	180	87.7811	73.7406	1588	15	41.1765	26.4706	33.8235
158	LPieBul2_4	12_2	9344c_TRA_Data	20/02/2019	14.694	74	1370	1.0219	575	3095.65	0.0144	yes	2.86	0.17	0.206	0.011	0.99011	4.85437	0.3	0.1	0.0012	0.0564	0.0037	1353	47	1203	61	1622	20	1108	71	88.9135	74.1677	1622	20	39.381	18.953	29.167
159	LPieBul2Exp3_2	27_2	9349c_TRA_Data	21/02/2019	15.406	78	400	0.435	556	1473.02	0.0082	yes	3.35	0.11	0.2329	0.0079	0.9668	4.29369	0.16	0.10399	0.0011	0.0546	0.0027	1486	26	1347	41	1696.4	11	1074	52	90.646	79.4034	1696.4	11	45.433	26.933	36.183
160	LPieBul1LPieBul2_8	87_1	9343c_TRA_Data	20/02/2019	14.122	71	1600	0.94375	1620	1376.54	0.0225	yes	3.094	0.058	0.2174	0.0039	0.49808	4.59982	0.039	0.10419	0.0015	0.0531	0.0019	1431	14	1267.8	21	1699	20	1046	37	88.5954	74.6204	1699	20	30.611	17.628	24.1195
161	LPieBul1_8	49_1	9341c_TRA_Data	20/02/2019	13.94	70	470	0.878723	970	696.907	0.0313	yes	2.933	0.077	0.2025	0.0055	0.56769	4.93827	0.14	0.1042	0.0016	0.0298	0.0018	1388	20	1187	30	1713	29	593	35	85.5187	69.2936	1713	29	31.504	20.16	25.832
162	LPieBul1_4	24_1	9340c_TRA_Data	20/02/2019	11.906	60	3120	0.199359	2830	1791.52	0.0243	yes	3.118	0.068	0.214	0.0056	0.88906	4.6729	0.12	0.1056	0.0013	0.0439	0.0043	1435	17	1249	29	1724	15	866	83	87.0383	72.4478	1724	15	30.93	23.708	27.319
163	LPieBul2Exp4_1	43_2	9351c_TRA_Data	21/02/2019	24.574	123	798	0.511278	667	2428.79	0.0011	yes	3.487	0.046	0.2434	0.0043	0.86266	4.10846	0.046	0.10587	0.0025	0.0638	0.0027	1523.1	10	1404	22	1729.3	27	1248	52	92.1804	81.1889	1729.3	27	34.031	20.258	27.1445
164	LPieBul1_12	13_1	9335c_TRA_Data	20/02/2019	3.5403	18	645	0.227907	440	2759.09	0.0093	yes	3.709	0.15	0.2505	0.0098	0.54482	3.99202	0.082	0.1071	0.0029	0.0955	0.0047	1573	33	1441	51	1751	21	1843	88	91.6084	82.2958	1751	21	39.903	25.545	32.724
165	LPieBul2_10	18_2	9344c_TRA_Data	20/02/2019	16.316	82	1340	0.380597	561	4153.3	0.0068	yes	3.74	0.19	0.25	0.011	0.98163	4	0.21	0.1082	0.0013	0.0462	0.0055	1562	45	1435	58	1763	20	910	110	91.8694	81.3953	1763	20	41.154	22.746	31.95
166	LPieBul2_8	16_2	9344c_TRA_Data	20/02/2019	17.802	89	226	0.518142	780	682.051	0.0139	yes	3.65	0.13	0.2427	0.0081	0.94893	4.12031	0.14	0.1093	0.0014	0.0325	0.0033	1552	28	1398	42	1786	17	645	64	90.0773	78.2755	1786	17	38.096	30.437	34.2665
	Notes
	1 Calibration standard: 91500m zircon (U=80 ppm, Th=30 ppm) (Wiedenbeck et al., 2004)
	2 Common Pb correction made using the method of Andersen (2002), as calculated by Iolite v.3.6
	3 Data corrected for background, drift and downhole U/Pb fractionation using Iolite v.3.6 and 91500 zircon as calibration standard
	4 Uncertainties Uncertainties quoted are Iolite output of 2SE for isotopic ratios, either as internal error only and expressed as 2sint for age or propagated random errors (Internal error + Calculated excess uncertainity) and expressed as 2sprop for age (Paton et al., 2010)
	5 Dates calculated using the decay constants of Jaffey et al. (1971)
	6 Concordence calculated as (206Pb-238U age/207Pb-235U age)*100
	7 Concordance calculated as (206Pb-238U age/207Pb-206Pb age)*100
	8 If zircon age <1100Ma, preferred age is 206Pb-238U age with concordance as 90%-105%; if zircon age ≥1100Ma, Preferred age is 207Pb-206Pb age with concordance as 85%-105%.

## Sheet: G49684
Sylvester, P.J., Souders, A.K., and Liu, R., 2022, Significance of U-Pb detrital zircon geochronology for mudstone provenance: Geology, v. 50, https://doi.org/10.1130/G49684.1
